# Supplementary material for: Salicyldimine-based Schiff's complex of copper(ii) as an efficient catalyst for the synthesis of nitrogen and oxygen heterocycles
Source: Royal Society of Chemistry journal article supplement (doi:10.1039/c4nj02391a), 2015-01-01
Supplement: c4nj02391a1.pdf [file c4nj02391a1.pdf]

## Salicyldimine based schiff's complex of copper (II) as an efficient catalyst for the synthesis of nitrogen and oxygen heterocycles

Manjulla Gupta<sup>a</sup>, Monika Gupta\*<sup>a</sup>, RajniKant<sup>b</sup> and Vivek Gupta<sup>b</sup>

<sup>a</sup>Department of Chemistry, University of Jammu, Jammu-180 006, India

Email\*: [monika.gupta77@rediffmail.com](mailto:monika.gupta77@rediffmail.com)

<sup>b</sup>Post-Graduate Department of Physics & Electronics, University of Jammu, Jammu Tawi - 180 006, India

### Table of contents

|                                                  |      |
|--------------------------------------------------|------|
| 1. XRD of SiO <sub>2</sub> -Cu(OAc) <sub>2</sub> | 2    |
| 2. Spectral details of some compounds            | 2-8  |
| 3. <sup>1</sup> H NMR of all the compounds       | 9-46 |

## Supplementary Information

The XRD pattern of SiO<sub>2</sub>-Cu(OAc)<sub>2</sub> has been shown in the following **fig.**

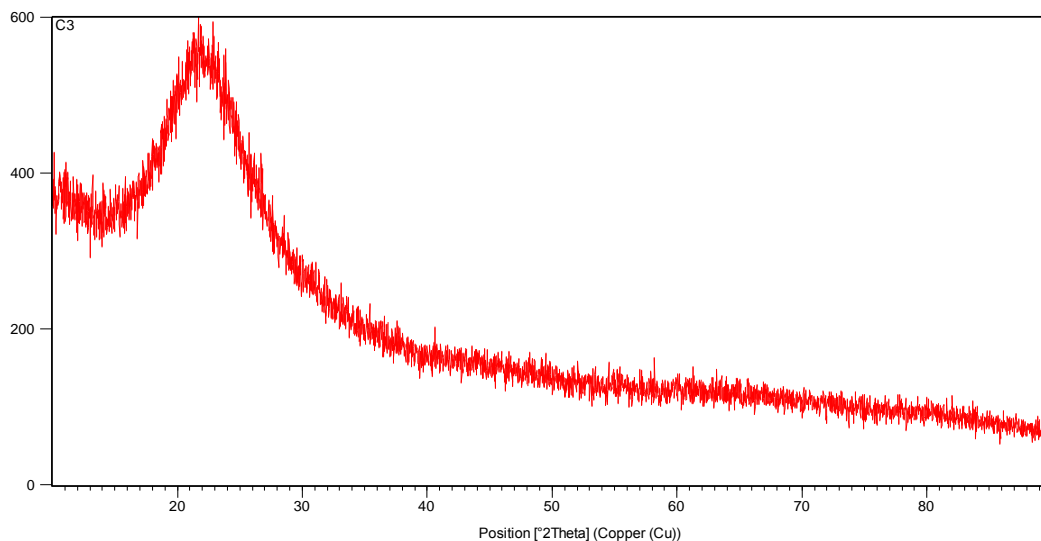

**Fig.** XRD graph of SiO<sub>2</sub>-Cu(OAc)<sub>2</sub>

### *Spectral details of some compounds*

**2-amino-6,6,8,8-tetrahydro-7,7-dimethyl-5-oxo-4-phenyl-4H-chromene-3-carbonitrile** (entry 1, table 2)

**IR** ( $\nu_{\max}$  in cm<sup>-1</sup>, KBr): 1110 (C-N str.), 1565 (aromatic C=C str.), 3022 (aromatic C-H str.), 3432 (N-H str.).

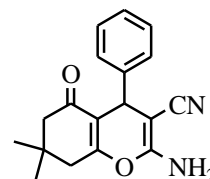

**<sup>1</sup>H NMR** (400 MHz, DMSO-d<sub>6</sub>):  $\delta$  0.93 (s, 3H, CH<sub>3</sub>), 1.07 (s, 3H, CH<sub>3</sub>), 2.04-2.29 (m, 4H, 2 X CH<sub>2</sub>), 4.25 (s, 1H, CH), 6.40 (s, 1H, NH<sub>2</sub>), 7.11-7.42 (m, 5H, ArH).

**<sup>13</sup>C NMR** (400 MHz, DMSO-d<sub>6</sub>):  $\delta$  28.01, 29.25, 31.02, 34.02, 51.55, 54.32, 118.01, 124.78, 127.61, 128.49, 128.69, 140.09, 156.76, 176.18, 190.39.

**MS:**  $m/z$  294 (M<sup>+</sup>).

**2-amino-6,6,8,8-tetrahydro-7,7-dimethyl-5-oxo-4-p-tolyl-4H-chromene-3-carbonitrile** (entry 2, table 2)

**IR** ( $\nu_{\max}$  in  $\text{cm}^{-1}$ , **KBr**): 1289 (C-N str.), 1513 (aromatic C=C str.),  
3033 (aromatic C-H str.), 3325 (N-H str.).

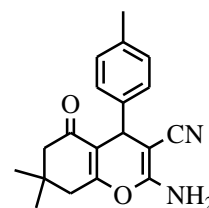

**$^1\text{H}$  NMR** (400 MHz, **DMSO- $d_6$** ):  $\delta$  0.95 (s, 3H,  $\text{CH}_3$ ), 1.04 (s, 3H,  $\text{CH}_3$ ), 2.00-2.11 (m, 4H, 2 X  $\text{CH}_2$ ), 2.25 (s, 3H,  $\text{CH}_3$ ), 4.13 (s, 1H, CH), 6.99 (s, 1H,  $\text{NH}_2$ ), 7.01-7.10 (m, 4H, ArH).

**$^{13}\text{C}$  NMR** (400 MHz, **DMSO- $d_6$** ):  $\delta$  20.24, 27.14, 28.72, 32.11, 35.64, 50.63, 58.74, 113.05, 120.28, 127.25, 129.54, 136.09, 142.29, 158.78, 162.62, 182.27, 196.11

**MS**:  $m/z$  308 ( $\text{M}^+$ ).

**2-amino-4-(4-fluorophenyl)-6,6,8,8-tetrahydro-7,7-dimethyl-5-oxo-4H-chromene-3-carbonitrile**  
(entry 5, table 2)

**IR** ( $\nu_{\max}$  in  $\text{cm}^{-1}$ , **KBr**): 1145 (C-N str.), 1595 (aromatic C=C str.),  
3078 (aromatic C-H str.), 3435 (N-H str.).

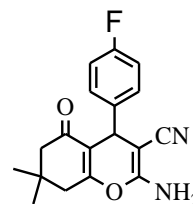

**$^1\text{H}$  NMR** (400 MHz, **DMSO- $d_6$** ):  $\delta$  0.91 (s, 3H,  $\text{CH}_3$ ), 1.21 (s, 3H,  $\text{CH}_3$ ), 1.89-2.34 (m, 4H, 2 X  $\text{CH}_2$ ), 4.27 (s, 1H, CH), 6.87 (s, 1H,  $\text{NH}_2$ ), 7.11-7.85 (m, 4H, ArH).

**$^{13}\text{C}$  NMR** (400 MHz, **DMSO- $d_6$** ):  $\delta$  28.82, 33.75, 39.60, 40.82, 51.49, 54.39, 114.01, 118.31, 124.78, 129.77, 136.09, 156.71, 162.21, 176.18, 190.39.

**MS**:  $m/z$  620 ( $\text{M}^+$ ).

**2-amino-4-(4-chlorophenyl)-6,6,8,8-tetrahydro-7,7-dimethyl-5-oxo-4H-chromene-3-carbonitrile**  
(entry 8, table 2)

**IR** ( $\nu_{\max}$  in  $\text{cm}^{-1}$ , **KBr**): 1266 (C-N str.), 1491 (aromatic C=C str.),  
3070 (aromatic C-H str.), 3379 (N-H str.).

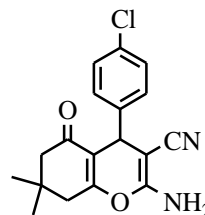

**$^1\text{H}$  NMR** (400 MHz, **DMSO- $d_6$** ):  $\delta$  0.95 (s, 3H,  $\text{CH}_3$ ), 1.04 (s, 3H,  $\text{CH}_3$ ), 2.09-2.28 (m, 4H, 2 X  $\text{CH}_2$ ), 4.20 (s, 1H, CH), 7.09 (s, 1H,  $\text{NH}_2$ ), 7.17-7.19 (d, 2H, ArH), 7.35-7.37 (d, 2H, ArH).

**$^{13}\text{C}$  NMR** (400 MHz, **DMSO- $d_6$** ):  $\delta$  27.04, 28.26, 31.75, 35.63, 50.20, 58.01, 112.79, 119.87, 128.84, 129.18, 131.57, 144.45, 158.57, 162.91, 196.10.

**MS:**  $m/z$  328 ( $M^+$ ), 330 ( $M+2$ )

**2-amino--6,6,8,8-tetrahydro-7,7-dimethyl-4-(4-nitrophenyl)-5-oxo-4H-chromene-3-carbonitrile (entry 8, table 2)**

**IR** ( $\nu_{\max}$  in  $\text{cm}^{-1}$ , **KBr**): 1090 (C-N str.), 1498 (aromatic C=C str.),  
3076 (aromatic C-H str.), 3389 (N-H str.).

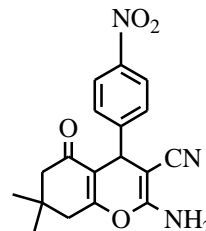

**$^1\text{H}$  NMR (400 MHz, DMSO- $d_6$ ):**  $\delta$  0.93 (s, 3H,  $\text{CH}_3$ ), 1.07 (s, 3H,  $\text{CH}_3$ ), 2.19-2.30 (m, 4H, 2 X  $\text{CH}_2$ ), 4.26 (s, 1H, CH), 6.54 (s, 1H,  $\text{NH}_2$ ), 7.19-7.39 (m, 4H, ArH).

**$^{13}\text{C}$  NMR (400 MHz, DMSO- $d_6$ ):**  $\delta$  28.82, 33.77, 39.60, 40.89, 51.45, 53.87, 118.45, 123.19, 124.79, 129.00, 145.89, 149.32, 156.90, 178.09, 190.46.

**MS:**  $m/z$  339 ( $M^+$ ).

**Ethyl-6-amino-5-cyano-2-methyl-4-phenyl-4H-pyran-3-carboxylate (entry 15, table 2)**

**IR** ( $\nu_{\max}$  in  $\text{cm}^{-1}$ , **KBr**): 1165 (C-N str.), 1532 (aromatic C=C str.),  
3099 (aromatic C-H str.), 3474 (N-H str.).

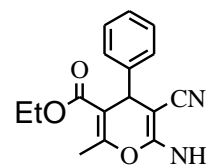

**$^1\text{H}$  NMR (400 MHz, DMSO- $d_6$ ):**  $\delta$  1.36 (t, 3H,  $\text{CH}_3$ ), 2.13 (s, 3H,  $\text{CH}_3$ ), 4.14 (q, 2H,  $\text{CH}_2$ ), 4.36 (s, 1H, CH), 6.44 (s, 1H,  $\text{NH}_2$ ), 7.24-7.37 (m, 5H, ArH).

**$^{13}\text{C}$  NMR (400 MHz, DMSO- $d_6$ ):**  $\delta$  14.70, 15.82, 40.54, 55.64, 61.58, 106.54, 118.43, 127.54, 128.49, 128.69, 140.52, 152.95, 157.62, 165.53.

**MS:**  $m/z$  284 ( $M^+$ ).

**Ethyl-6-amino-5-cyano-2-methyl-4-p-tolyl-4H-pyran-3-carboxylate (entry 16, table 2)**

**IR** ( $\nu_{\max}$  in  $\text{cm}^{-1}$ , **KBr**): 1262 (C-N str.), 1514 (aromatic C=C str.),  
3042 (aromatic C-H str.), 3329 (N-H str.).

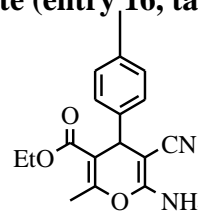

**$^1\text{H}$  NMR (400 MHz, DMSO- $d_6$ ):**  $\delta$  1.06 (t, 3H,  $\text{CH}_3$ ), 2.09 (s, 3H,  $\text{CH}_3$ ), 2.26 (s, 3H,  $\text{CH}_3$ ), 3.94 (q, 2H,  $\text{CH}_2$ ), 4.25 (s, 1H, CH), 6.89 (s, 1H,  $\text{NH}_2$ ), 7.01-7.13 (m, 4H, ArH).

**<sup>13</sup>C NMR (400 MHz, DMSO-d<sub>6</sub>):** δ 14.01, 17.96, 21.21, 57.37, 60.53, 107.86, 120.24, 127.35, 129.34, 136.10, 142.51, 156.75, 158.75, 165.96.

**MS:** *m/z* 298 (M<sup>+</sup>).

**Ethyl-6-amino-4-(4-bromophenyl)-5-cyano-2-methyl-4H-pyran-3-carboxylate (entry 19, table 2)**

**IR (ν<sub>max</sub> in cm<sup>-1</sup>, KBr):** 1150 (C-N str.), 1632 (aromatic C=C str.),  
3011 (aromatic C-H str.), 3487 (N-H str.).

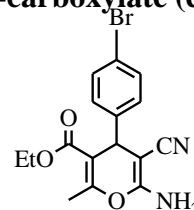

**<sup>1</sup>H NMR (400 MHz, DMSO-d<sub>6</sub>):** δ 1.16 (t, 3H, CH<sub>3</sub>), 2.34 (s, 3H, CH<sub>3</sub>), 3.54 (q, 2H, CH<sub>2</sub>), 4.67 (s, 1H, CH), 6.67 (s, 1H, NH<sub>2</sub>), 7.21-7.45 (m, 4H, ArH).

**<sup>13</sup>C NMR (400 MHz, DMSO-d<sub>6</sub>):** δ 12.01, 17.56, 22.01, 58.76, 61.53, 107.87, 121.24, 127.39, 129.56, 137.09, 141.51, 157.89, 157.75, 165.90.

**MS:** *m/z* 362 (M<sup>+</sup>), 364 (M+2).

**Ethyl-6-amino-5-cyano-2-methyl-4-(3-nitrophenyl)-4H-pyran-3-carboxylate (entry 23, table 2)**

**IR (ν<sub>max</sub> in cm<sup>-1</sup>, KBr):** 1269 (C-N str.), 1593 (aromatic C=C str.),  
3076 (aromatic C-H str.), 3399 (N-H str.).

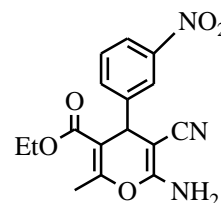

**<sup>1</sup>H NMR (400 MHz, DMSO-d<sub>6</sub>):** δ 1.03 (t, 3H, CH<sub>3</sub>), 2.36 (s, 3H, CH<sub>3</sub>), 3.97 (q, 2H, CH<sub>2</sub>), 4.50 (s, 1H, CH), 6.99 (s, 1H, NH<sub>2</sub>), 7.60-8.07 (m, 4H, ArH).

**<sup>13</sup>C NMR (400 MHz, DMSO-d<sub>6</sub>):** δ 13.79, 18.57, 39.25, 56.85, 60.68, 106.71, 119.74, 121.71, 130.30, 134.46, 147.72, 148.22, 158.22, 159.09, 165.41.

**MS:** *m/z* 329 (M<sup>+</sup>).

**Ethyl-6-amino-5-cyano-4-(furan-2-yl)-2-methyl-4H-pyran-3-carboxylate (entry 25, table 2)**

**IR** ( $\nu_{\max}$  in  $\text{cm}^{-1}$ , **KBr**): 1167 (C-N str.), 1589 (aromatic C=C str.), 3049 (aromatic C-H str.), 3432 (N-H str.).

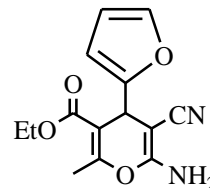

**$^1\text{H}$  NMR (400 MHz, DMSO- $d_6$ )**:  $\delta$  1.38 (t, 3H,  $\text{CH}_3$ ), 2.01 (s, 3H,  $\text{CH}_3$ ), 4.22 (q, 2H,  $\text{CH}_2$ ), 4.44 (s, 1H, CH), 6.06 (d, 1H, CH), 6.19 (t, 1H, CH), 6.99 (s, 1H,  $\text{NH}_2$ ), 7.17 (d, 1H, CH).

**$^{13}\text{C}$  NMR (400 MHz, DMSO- $d_6$ )**:  $\delta$  14.70, 15.82, 39.11, 61.50, 64.58, 104.39, 110.96, 113.41, 116.68, 140.56, 148.96, 150.96, 160.52, 164.93.

**MS**:  $m/z$  274 ( $\text{M}^+$ ).

### 3,3,6,6-Tetramethyl -9-phenyl -1,8-dioxodecahydroacridine [entry 1, table 3]

**IR** ( $\nu_{\max}$  in  $\text{cm}^{-1}$ , **KBr**): 1132 (C-N str.), 1590 (aromatic C=C str.), 1712 (C=O str.), 3034 (aromatic C-H str.), 3463 (N-H str.).

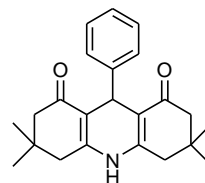

**$^1\text{H}$  NMR (400 MHz, DMSO- $d_6$ )**:  $\delta$  1.11 (s, 3H,  $\text{CH}_3$ ), 1.22 (s, 3H,  $\text{CH}_3$ ), 2.22-2.40 (m, 8H, 4 X  $\text{CH}_2$ ), 4.99 (s, 1H, CH), 7.21-7.30 (m, 5H, Ar-H), 11.55 (bs, 1H, NH).

**$^{13}\text{C}$  NMR (400 MHz, DMSO- $d_6$ )**:  $\delta$  27.67, 28.99, 30.99, 31.77, 46.11, 46.72, 114.90, 127.89, 131.21, 135.45, 189.99, 190.03.

**MS**:  $m/z$  349 ( $\text{M}^+$ ).

### 3,3,6,6-Tetramethyl -9-(4-methoxyphenyl) -1,8-dioxodecahydroacridine [entry 3, table 3]

**IR** ( $\nu_{\max}$  in  $\text{cm}^{-1}$ , **KBr**): 1139 (C-N str.), 1550 (aromatic C=C str.), 1756 (C=O str.), 3087 (aromatic C-H str.), 3466 (N-H str.).

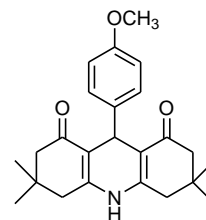

**$^1\text{H}$  NMR (400 MHz, DMSO- $d_6$ )**:  $\delta$  1.18 (s, 3H,  $\text{CH}_3$ ), 1.26 (s, 3H,  $\text{CH}_3$ ), 2.42-2.55 (m, 8H, 4 X  $\text{CH}_2$ ), 3.79 (s, 3H,  $\text{CH}_3$ ), 4.67 (s, 1H, CH), 7.18-7.31 (m, 4H, Ar-H), 11.68 (bs, 1H, NH).

**$^{13}\text{C}$  NMR (400 MHz, DMSO- $d_6$ )**:  $\delta$  28.63, 28.89, 30.39, 31.57, 47.01, 46.77, 113.90, 129.89, 132.21, 137.45, 189.98, 190.13.

**MS**:  $m/z$  379 ( $\text{M}^+$ ).

**3,3,6,6-Tetramethyl -9-(4-fluorophenyl) -1,8-dioxodecahydroacridine [entry 6, table 3]**

**IR ( $\nu_{\max}$  in  $\text{cm}^{-1}$ , KBr):** 1132 (C-N str.), 1558 (aromatic C=C str.),  
1764 (C=O str.), 3089 (aromatic C-H str.), 3465 (N-H str.).

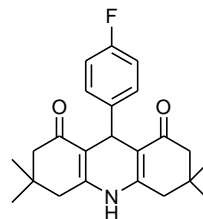

**$^1\text{H}$  NMR (400 MHz, DMSO- $d_6$ ):**  $\delta$  1.20 (s, 3H, CH<sub>3</sub>), 1.23 (s, 3H, CH<sub>3</sub>), 2.35-2.49 (m, 8H, 4 X CH<sub>2</sub>), 4.45 (s, 1H, CH), 7.28-7.39 (m, 4H, Ar-H), 11.22 (bs, 1H, NH).

**$^{13}\text{C}$  NMR (400 MHz, DMSO- $d_6$ ):**  $\delta$  28.63, 28.89, 30.39, 31.57, 47.01, 46.77, 113.90, 129.89, 132.21, 137.45, 189.98, 190.13.

**MS:**  $m/z$  367 ( $\text{M}^+$ ).

**3,3,6,6-Tetramethyl -9-(4-chlorophenyl) -1,8-dioxodecahydroacridine [entry 8, table 3]**

**IR ( $\nu_{\max}$  in  $\text{cm}^{-1}$ , KBr):** 1132 (C-N str.), 1593 (aromatic C=C str.),  
1681 (C=O str.), 3377 (N-H str.).

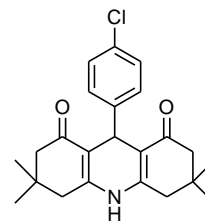

**$^1\text{H}$  NMR (400 MHz, DMSO- $d_6$ ):**  $\delta$  1.12 (s, 3H, CH<sub>3</sub>), 1.24 (s, 3H, CH<sub>3</sub>), 2.36-2.46 (m, 8H, 4 X CH<sub>2</sub>), 5.50 (s, 1H, CH), 7.02-7.29 (m, 4H, Ar-H), 11.90 (bs, 1H, NH).

**$^{13}\text{C}$  NMR (400 MHz, DMSO- $d_6$ ):**  $\delta$  27.26, 29.67, 31.17, 31.98, 46.14, 46.93, 115.21, 128.20, 131.33, 136.40, 189.36, 190.60.

**MS:**  $m/z$  383 ( $\text{M}^+$ ), 385 ( $\text{M}+2$ ).

**3,3,6,6-Tetramethyl -9-(4-bromophenyl) -1,8-dioxodecahydroacridine [entry 11, table 3]**

**IR ( $\nu_{\max}$  in  $\text{cm}^{-1}$ , KBr):** 1190 (C-N str.), 1498 (aromatic C=C str.),  
1712 (C=O str.), 3097 (aromatic C-H str.), 3432 (N-H str.).

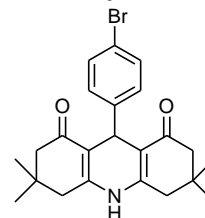

**$^1\text{H}$  NMR (400 MHz, DMSO- $d_6$ ):**  $\delta$  1.02 (s, 3H, CH<sub>3</sub>), 1.14 (s, 3H, CH<sub>3</sub>), 2.26-2.40 (m, 8H, 4 X CH<sub>2</sub>), 5.56 (s, 1H, CH), 7.12-7.26 (m, 4H, Ar-H), 11.89 (bs, 1H, NH).

**<sup>13</sup>C NMR (400 MHz, DMSO-d<sub>6</sub>):** δ 27.34, 30.06, 31.45, 32.08, 45.14, 47.93, 115.43, 129.20, 131.79, 136.54, 190.36, 190.78.

**MS:** *m/z* 428 (M<sup>+</sup>), 430 (M+2).

**3,3,6,6-Tetramethyl -9-(3-nitrophenyl)-1,8-dioxodecahydroacridine [entry 13, table 3]**

**IR (ν<sub>max</sub> in cm<sup>-1</sup>, KBr):** 1252 (C-N str.), 1499 (aromatic C=C str.),  
1697 (C=O str.), 3060 (aromatic C-H str.), 3410 (N-H str.).

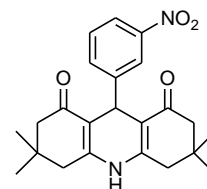

**<sup>1</sup>H NMR (400 MHz, DMSO-d<sub>6</sub>):** δ 1.15 (s, 3H, CH<sub>3</sub>), 1.30 (s, 3H, CH<sub>3</sub>), 2.38-2.50 (m, 8H, 4 X CH<sub>2</sub>),  
5.57 (s, 1H, CH), 7.29-8.08 (m, 4H, Ar-H), 11.89 (bs, 1H, NH).

**<sup>13</sup>C NMR (400 MHz, DMSO-d<sub>6</sub>):** δ 27.08, 29.36, 31.30, 32.88, 41.03, 42.94, 46.43, 47.15, 114.85,  
121.06, 122.24, 129.10, 133.01, 140.36, 148.52, 189.46, 191.01.

**MS:** *m/z* 394 (M<sup>+</sup>).



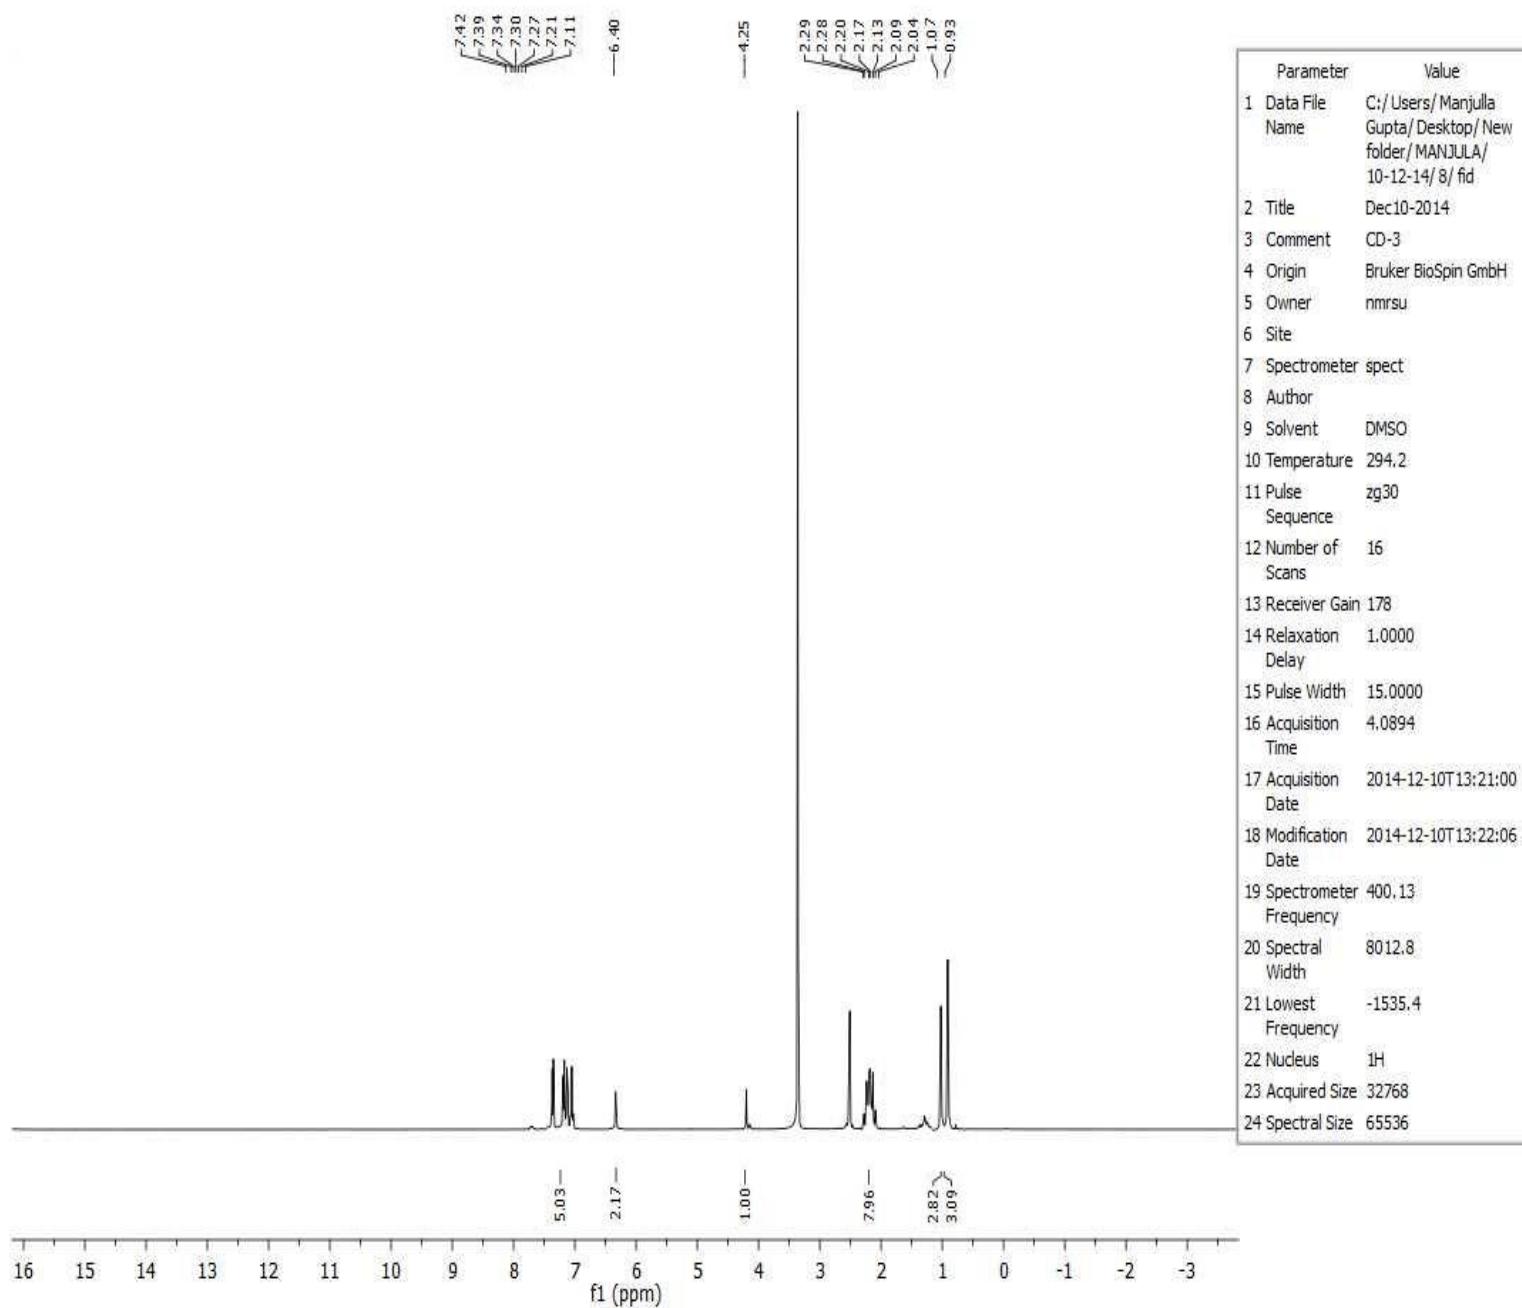

**Fig. 1** <sup>1</sup>H NMR spectra of 2-amino-6,6,8,8-tetrahydro-7,7-dimethyl-5-oxo-4-phenyl-4*H*-chromene-3-carbonitrile

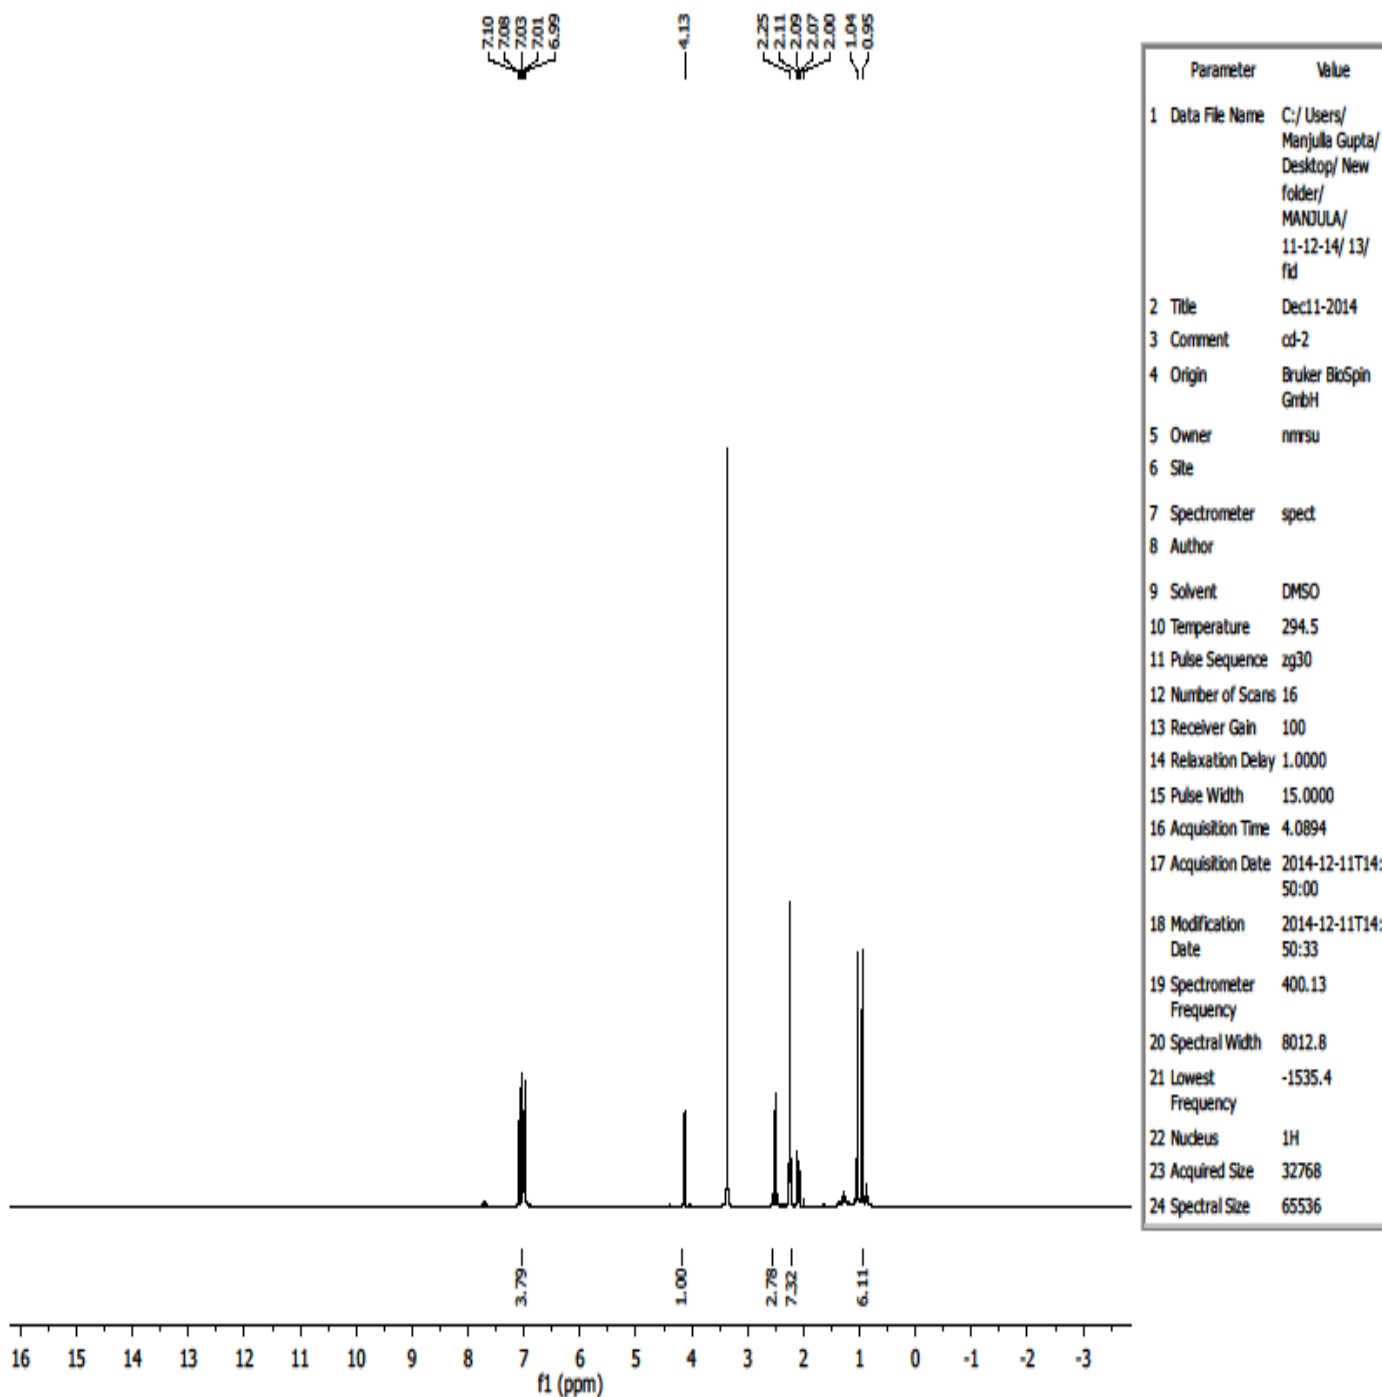

**Fig. 2**  $^1\text{H}$  NMR spectra of 2-amino-6,6,8,8-tetrahydro-7,7-dimethyl-5-oxo-4-*p*-tolyl-4*H*-chromene-3-carbonitrile

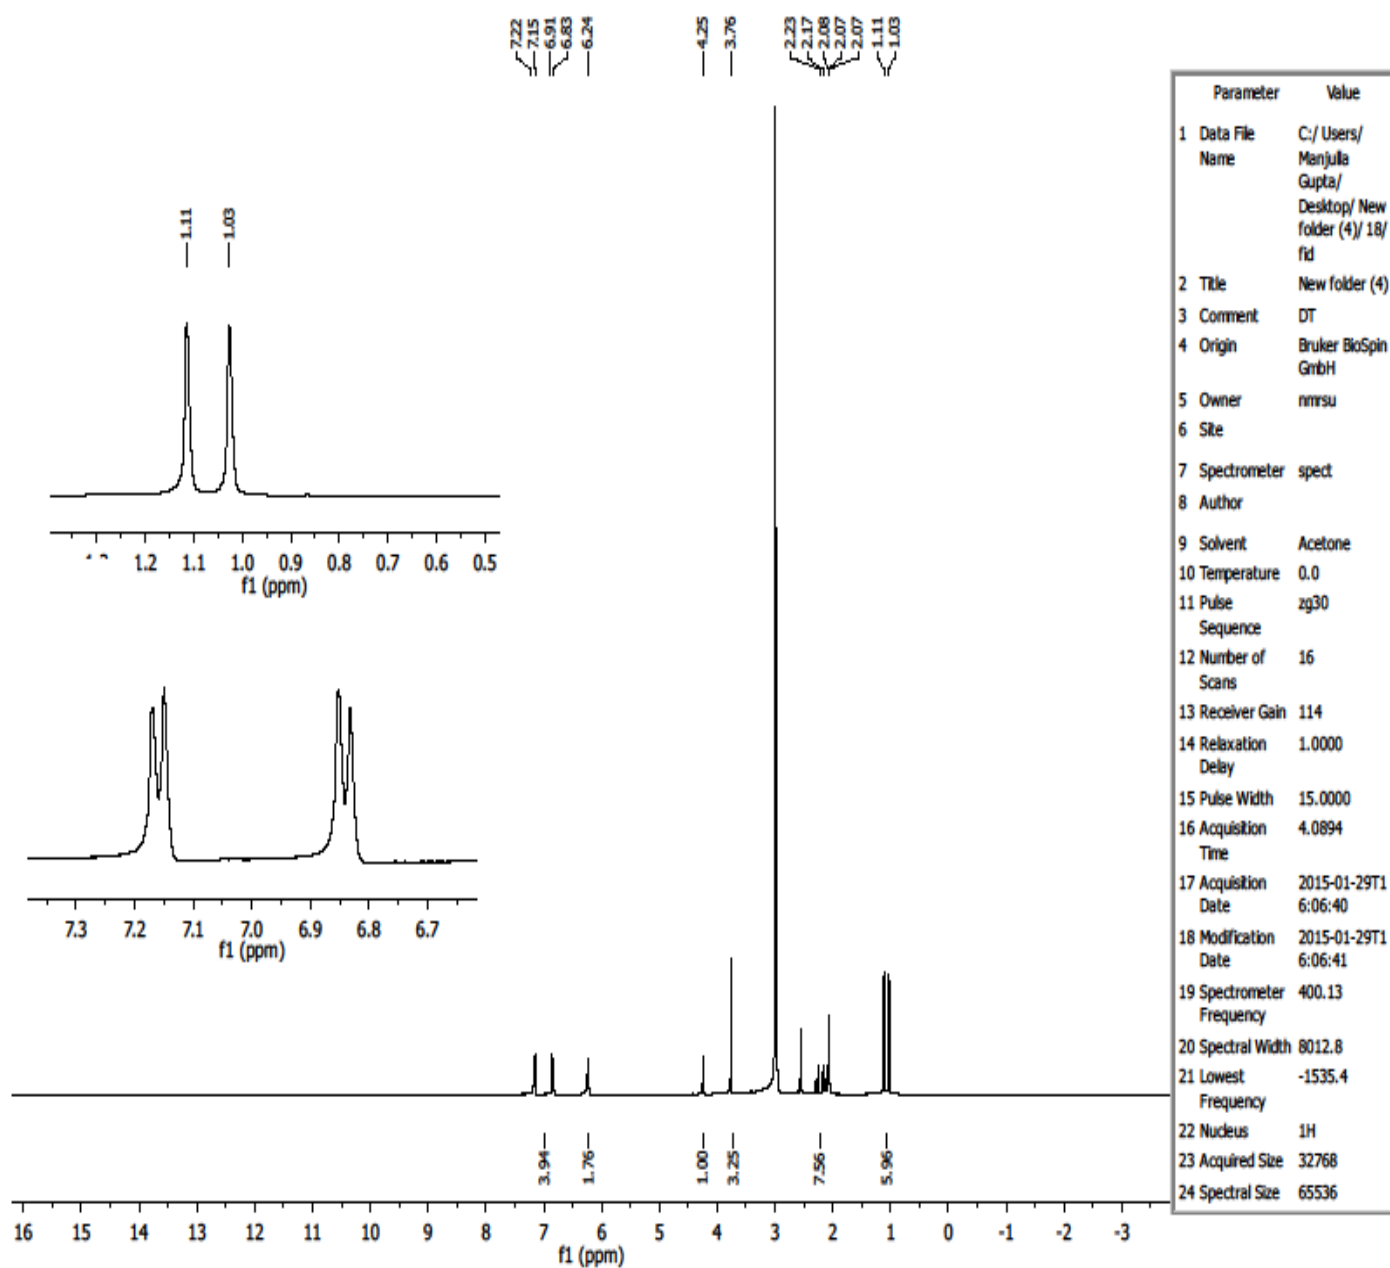

**Fig. 3**  $^1\text{H}$  NMR spectra of 2-amino-4-(4-methoxyphenyl)-6,6,8,8-tetrahydro-7,7-dimethyl-5-oxo-4H-chromene-3-carbonitrile

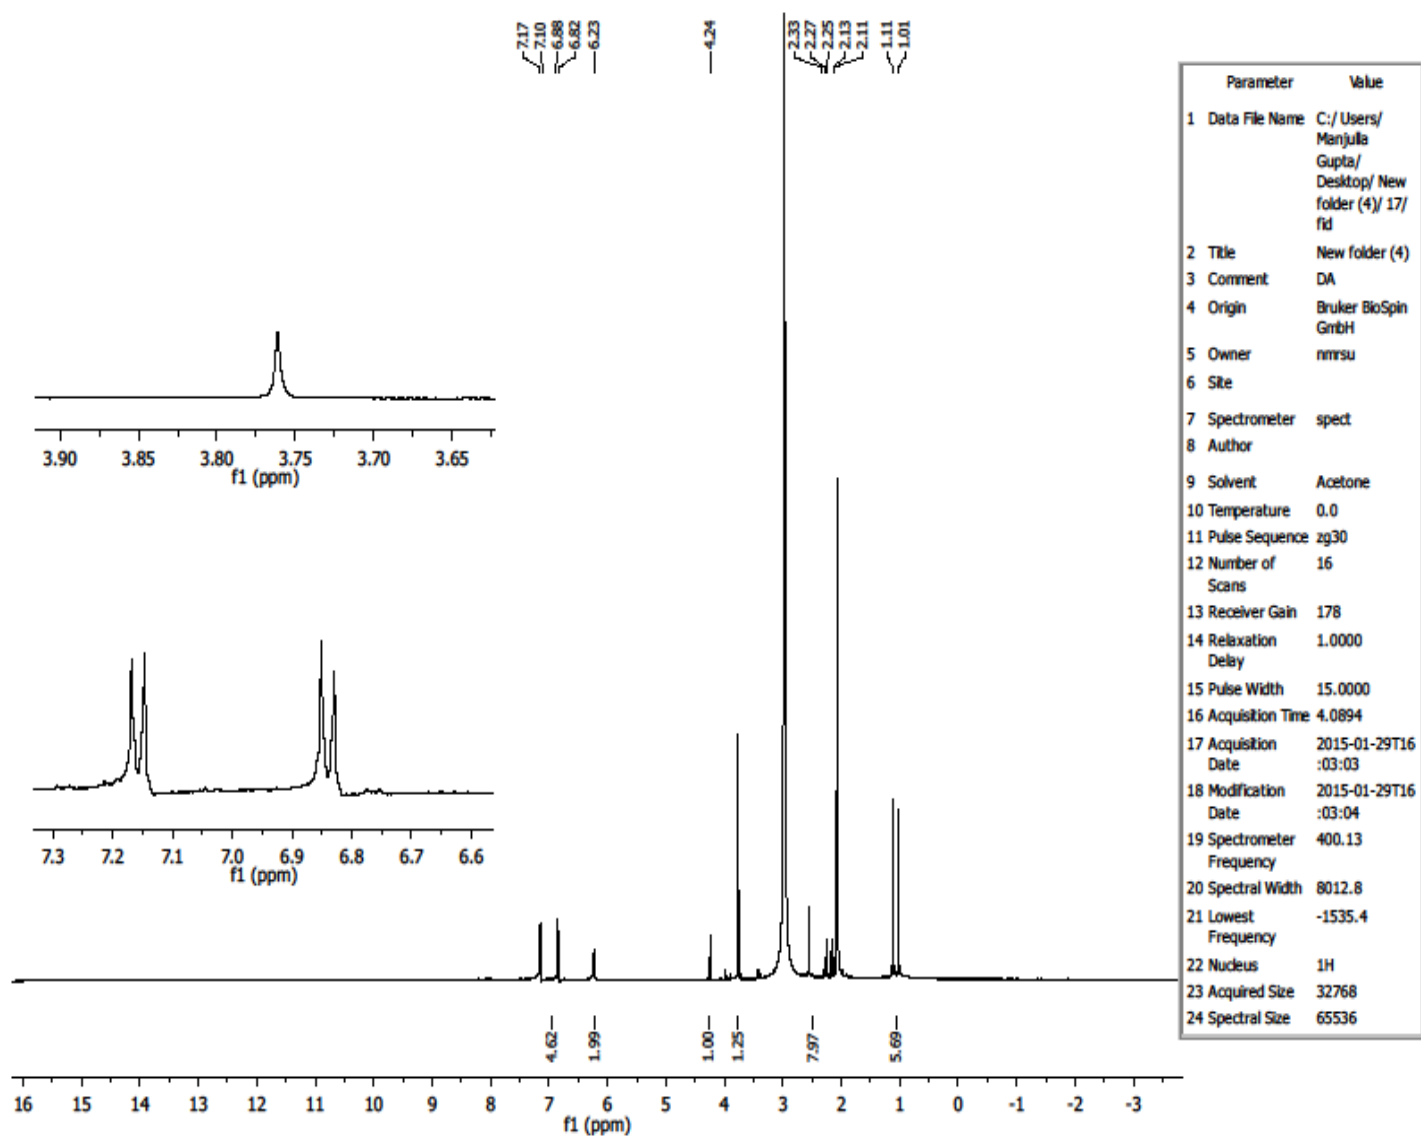

**Fig. 4**  $^1\text{H}$  NMR spectra of 2-amino-4-(4-hydroxyphenyl)-6,6,8,8-tetrahydro-7,7-dimethyl-5-oxo-4H-chromene-3-carbonitrile

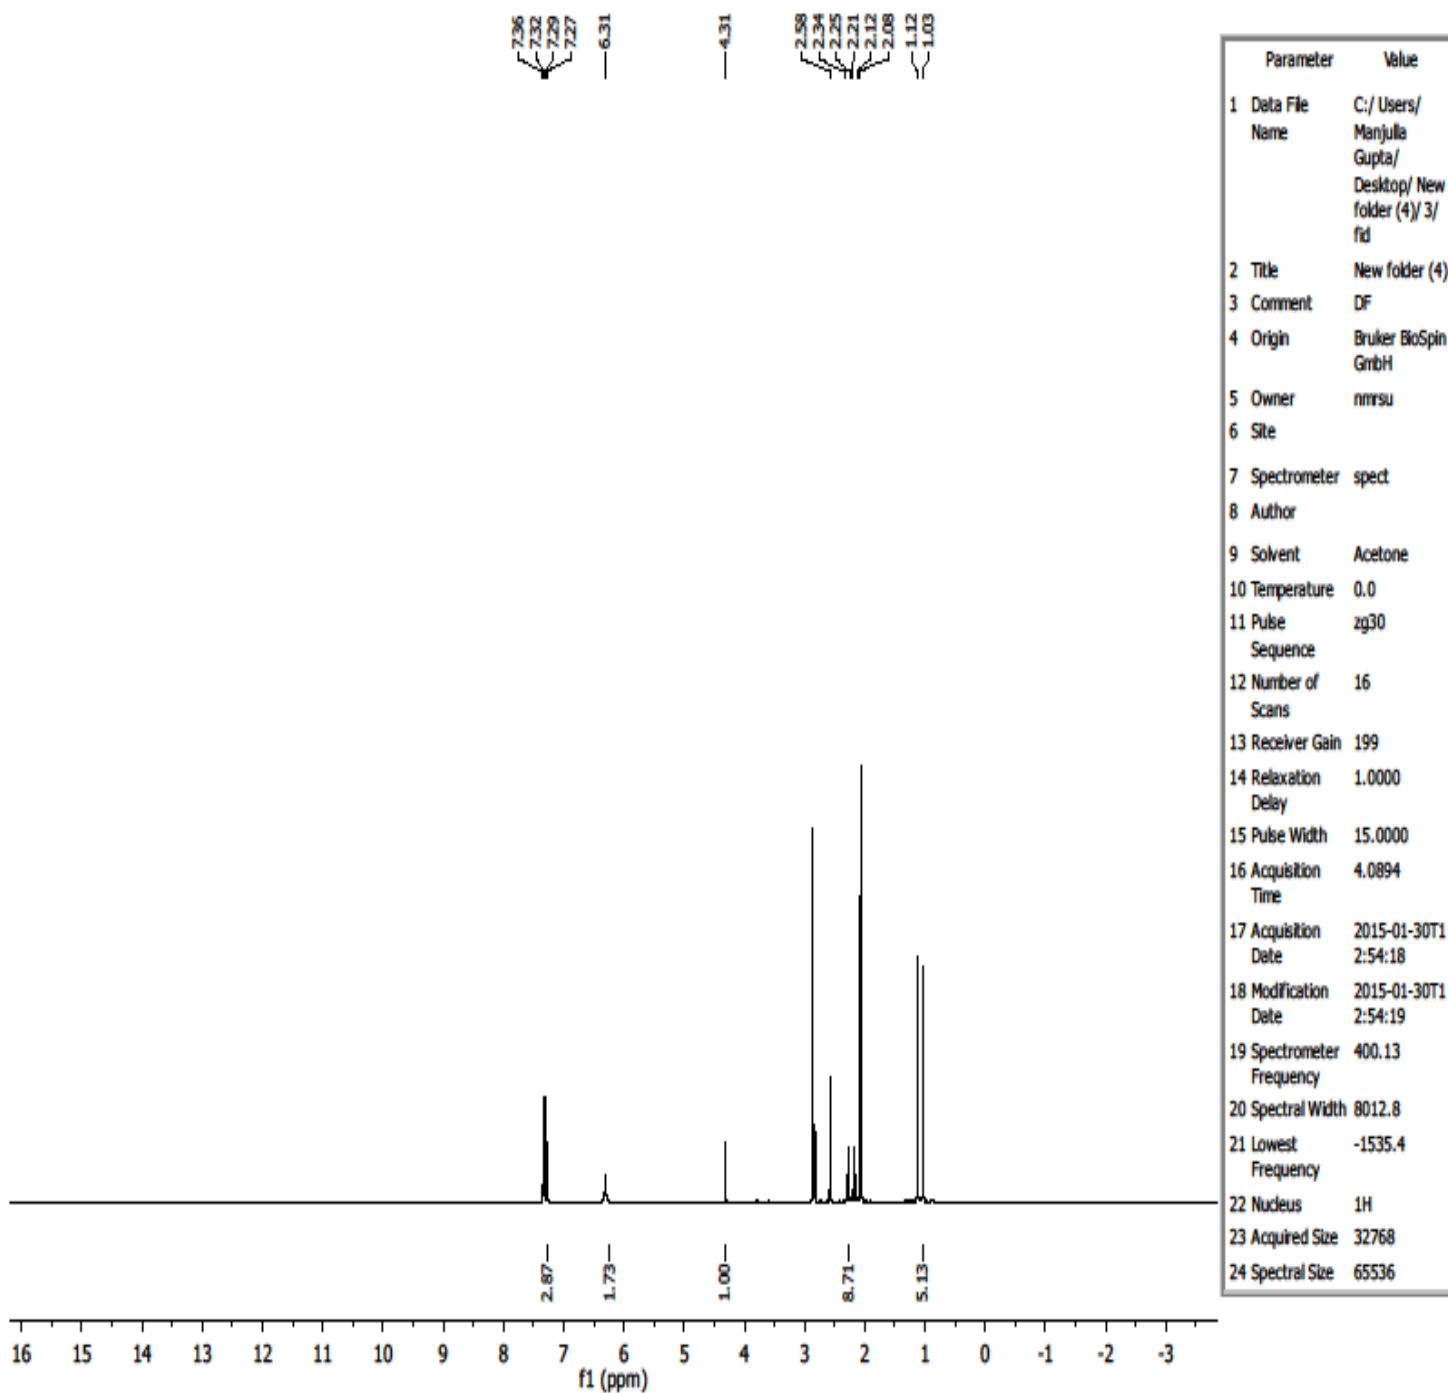

**Fig. 5**  $^1\text{H}$  NMR spectra of 2-amino-4-(4-fluorophenyl)-6,6,8,8-tetrahydro-7,7-dimethyl-5-oxo-4H-chromene-3-carbonitrile

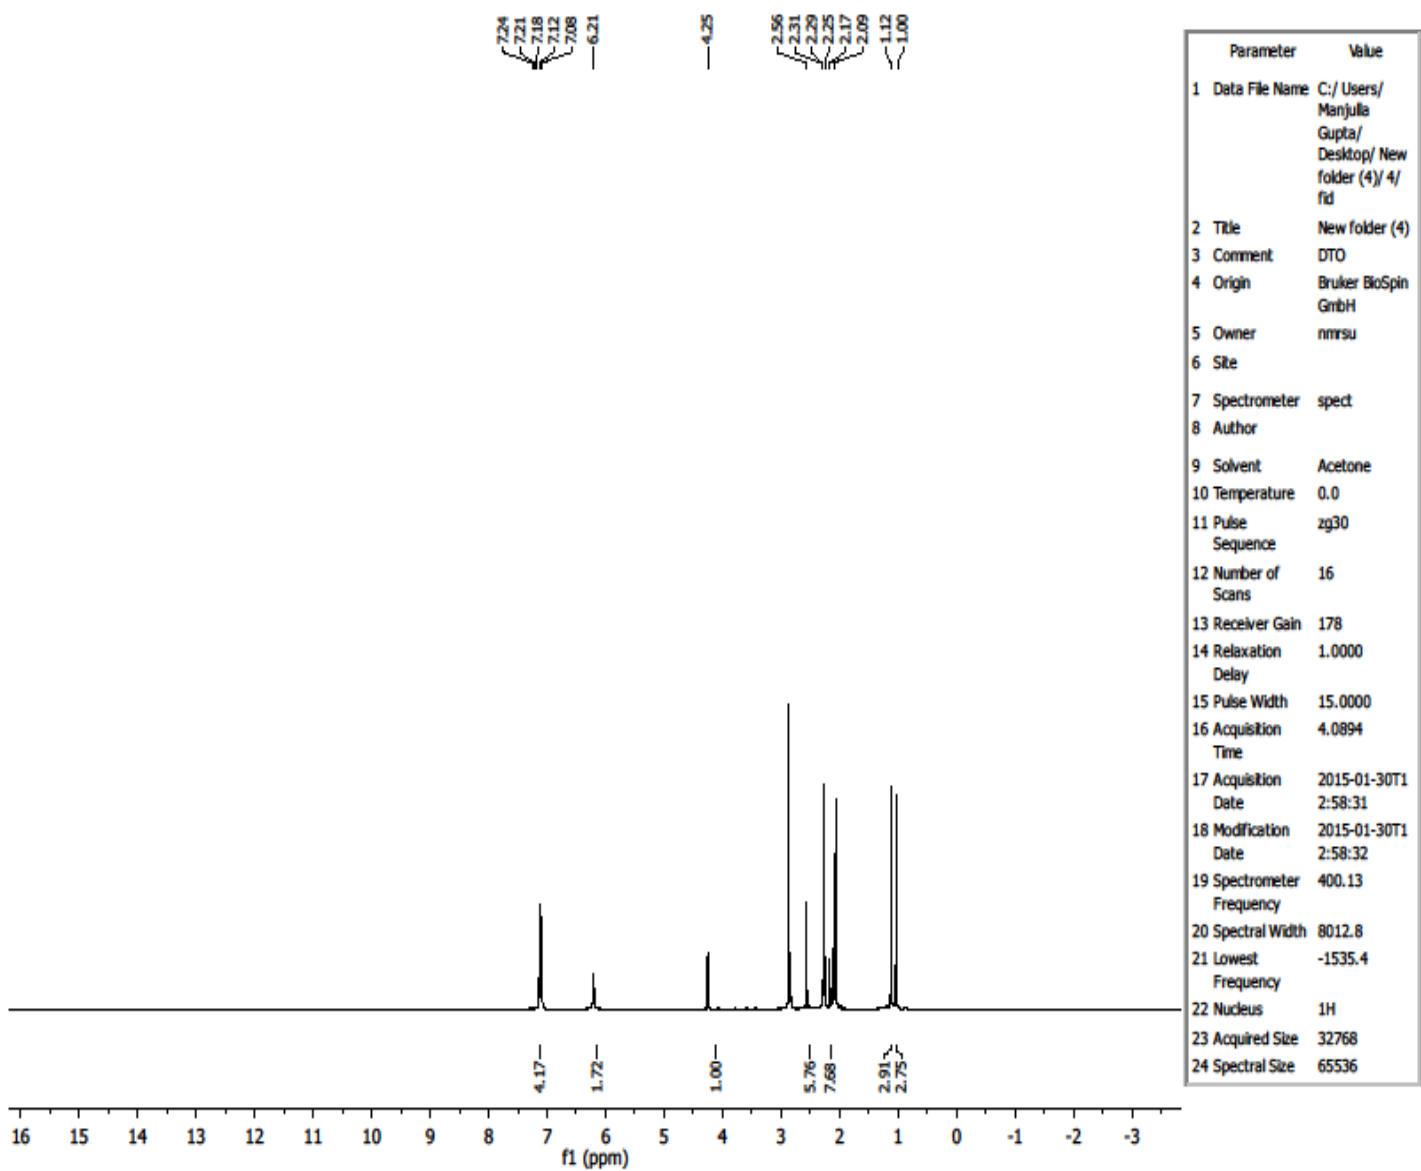

**Fig. 6**  $^1\text{H}$  NMR spectra of 2-amino-4-(4-(dimethylamino)phenyl)-6,6,8,8-tetrahydro-7,7-dimethyl-5-oxo-4*H*-chromene-3-carbonitrile

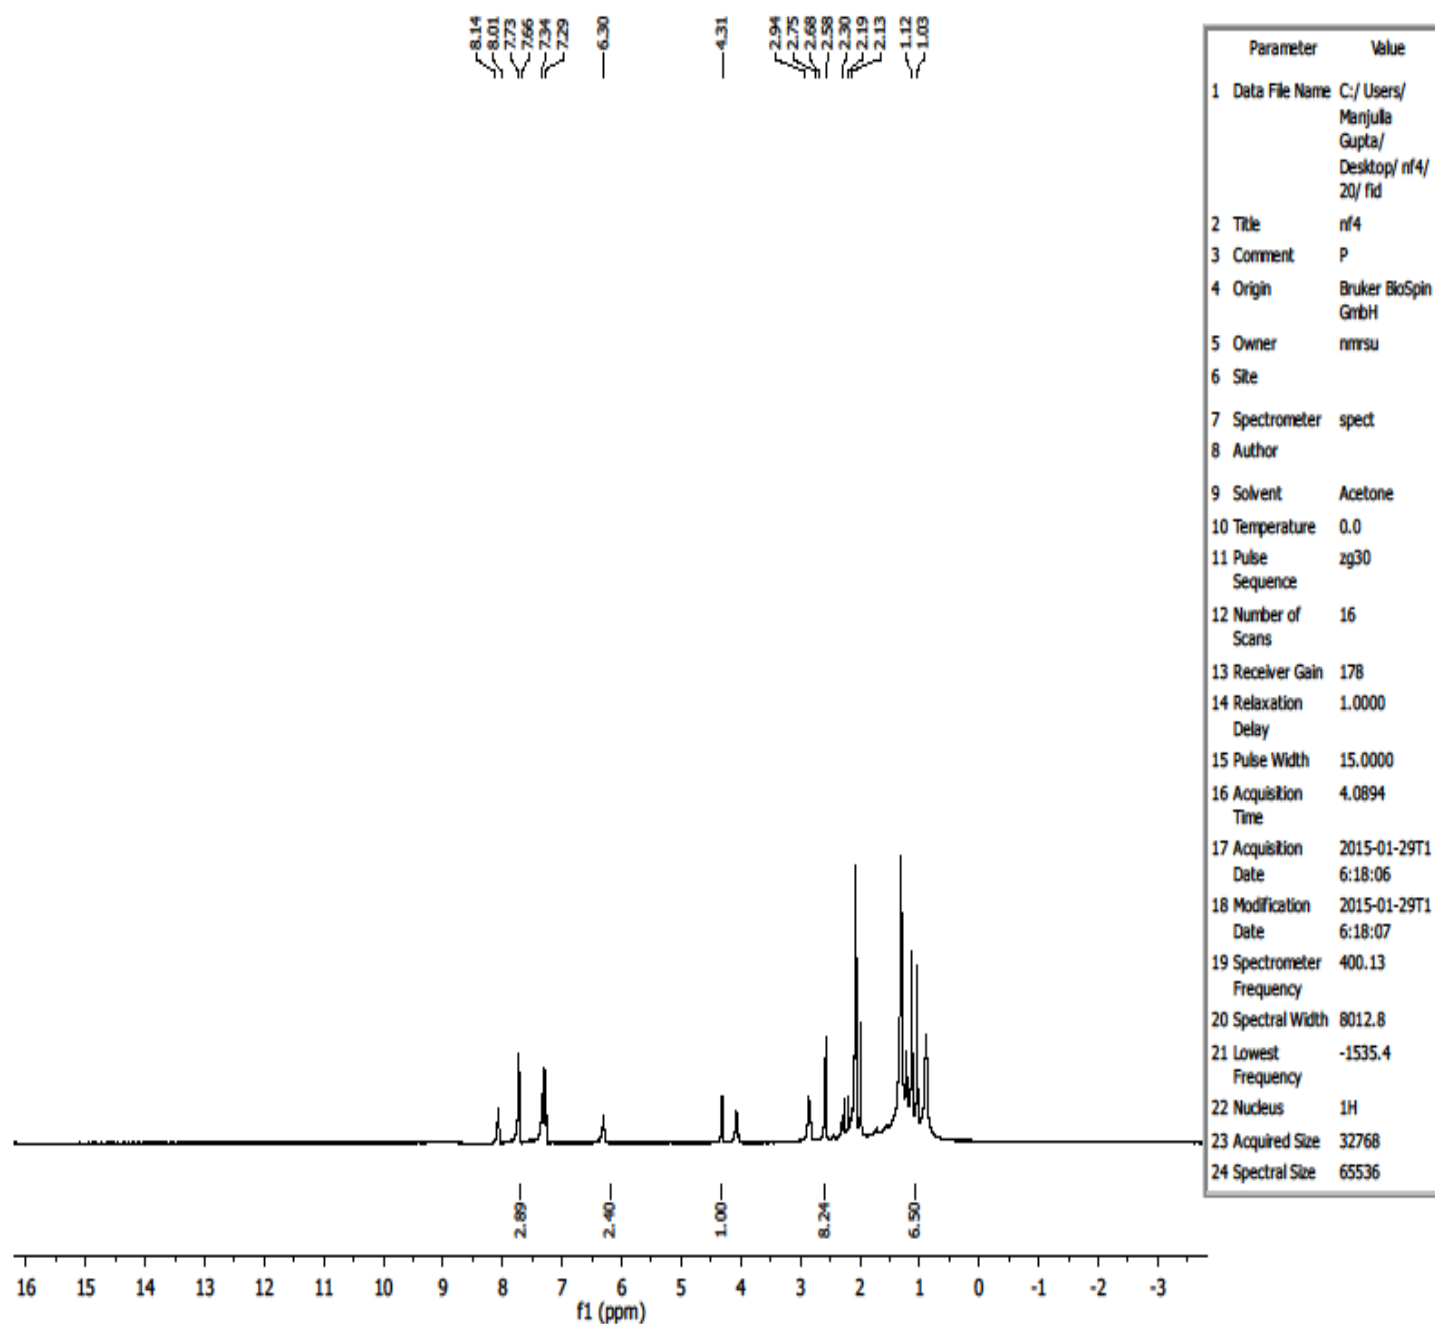

**Fig. 7**  $^1\text{H}$  NMR spectra of 2-amino-4-(furan-2-yl)-6,6,8,8-tetrahydro-7,7-dimethyl-5-oxo-4*H*-chromene-3-carbonitrile

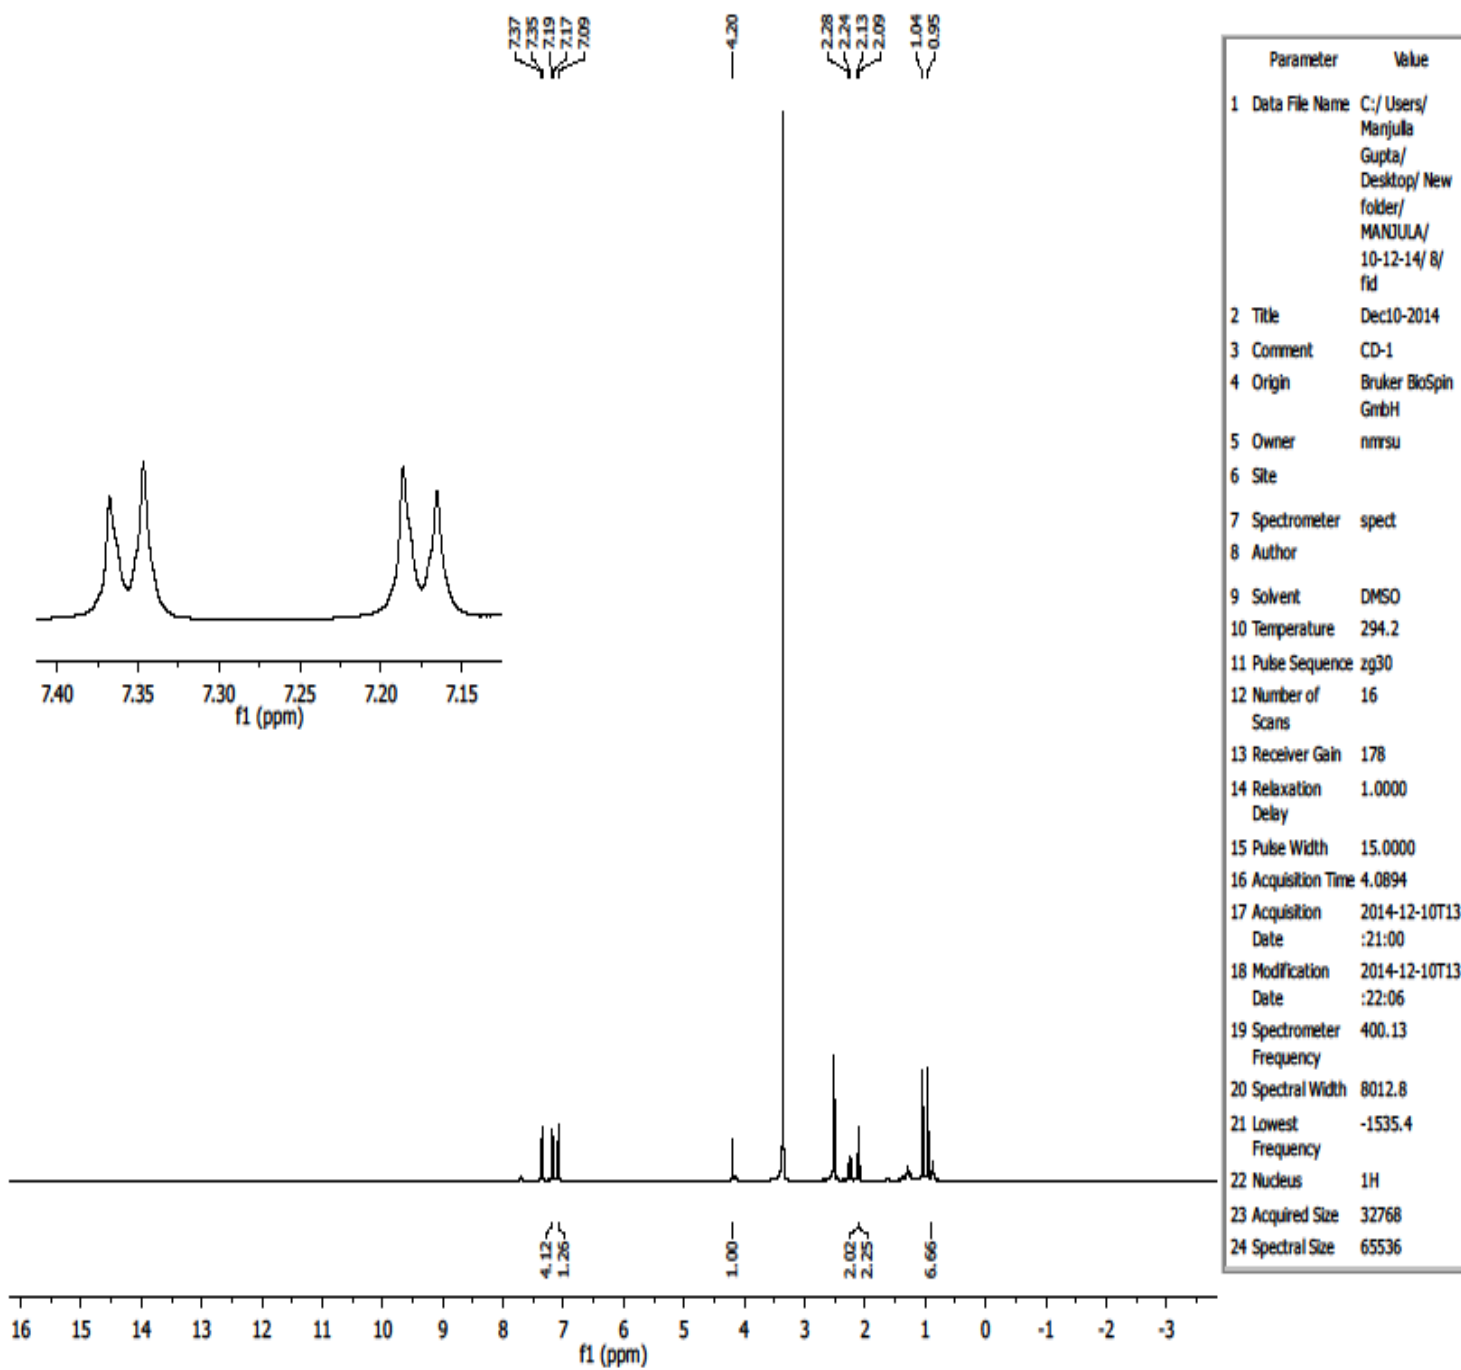

**Fig. 8**  $^1\text{H}$  NMR spectra of 2-amino-4-(4-chlorophenyl)-6,6,8,8-tetrahydro-7,7-dimethyl-5-oxo-4H-chromene-3-carbonitrile



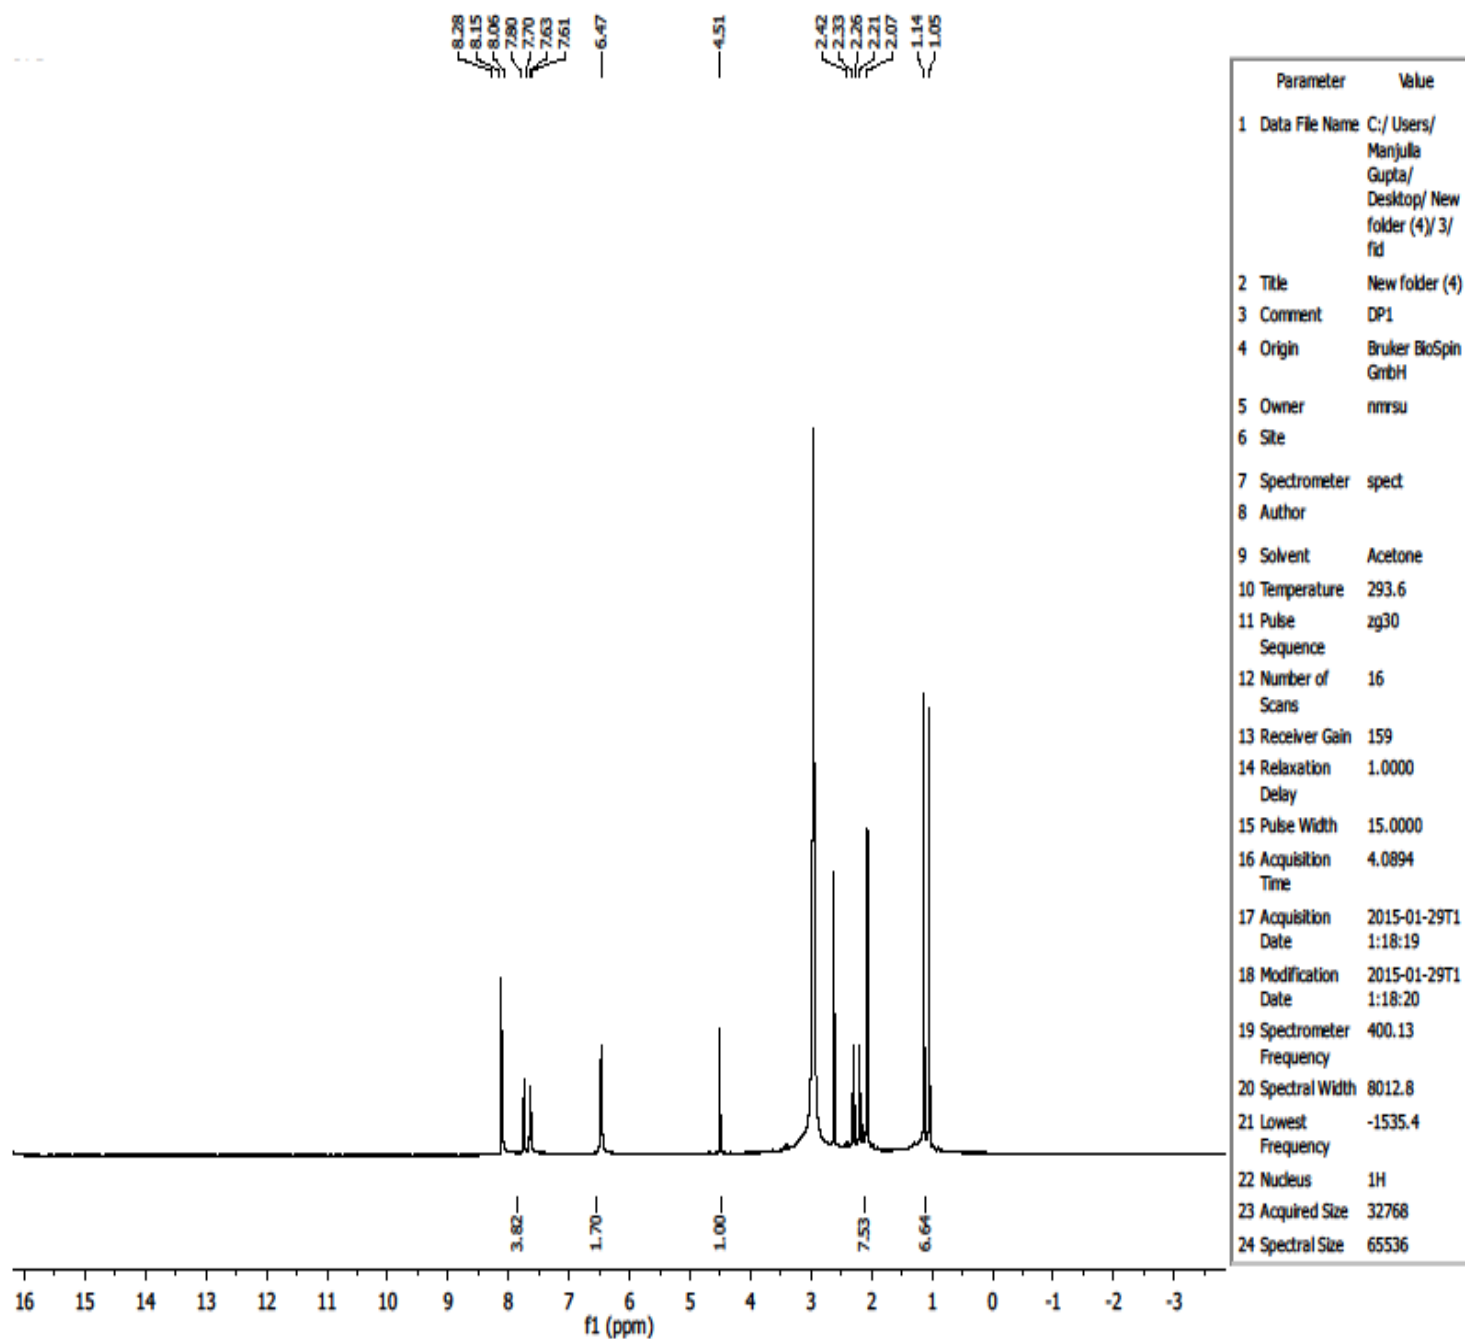

**Fig. 9** <sup>1</sup>H NMR spectra of 2-amino-4-(2-chlorophenyl)-6,6,8,8-tetrahydro-7,7-dimethyl-5-oxo-4*H*-chromene-3-carbonitrile

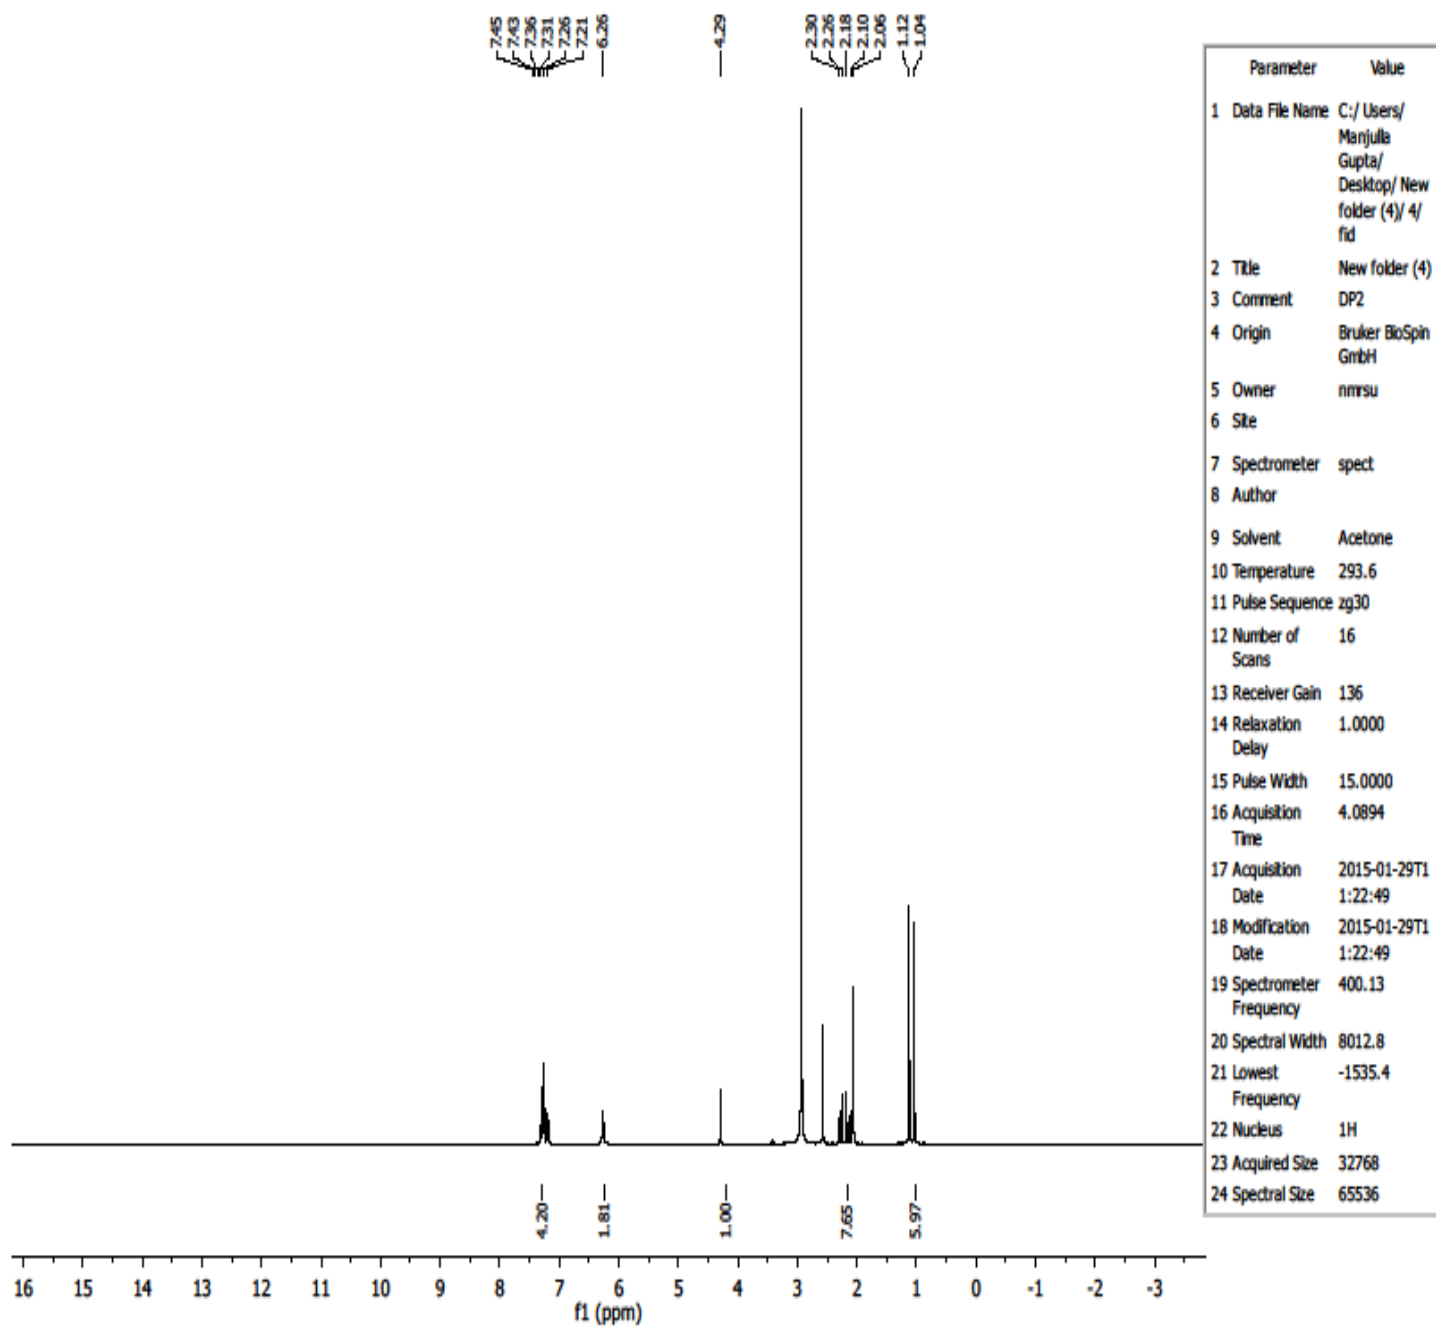

**Fig. 10**  $^1\text{H}$  NMR spectra of 2-amino-4-(4-bromophenyl)-6,6,8,8-tetrahydro-7,7-dimethyl-5-oxo-4*H*-chromene-3-carbonitrile

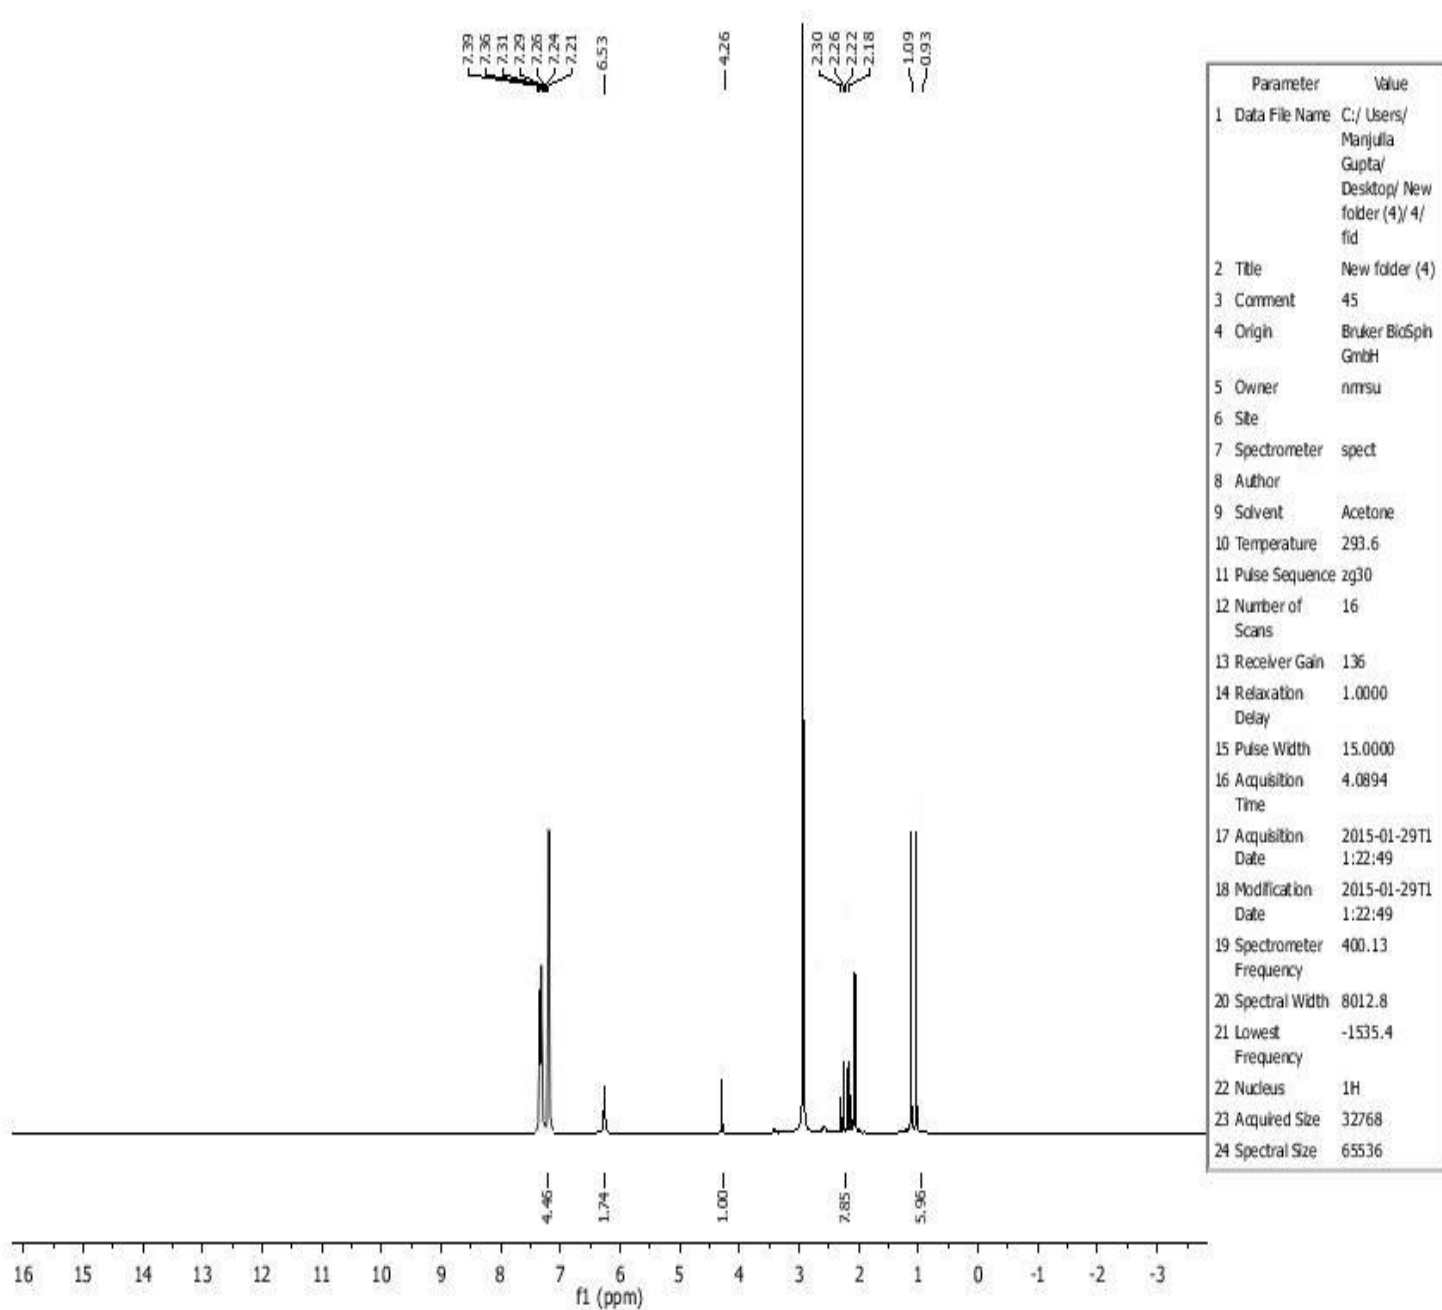

**Fig. 11**  $^1\text{H}$  NMR spectra of 2-amino-4-(4-nitrophenyl)-6,6,8,8-tetrahydro-7,7-dimethyl-5-oxo-4*H*-chromene-3-carbonitrile

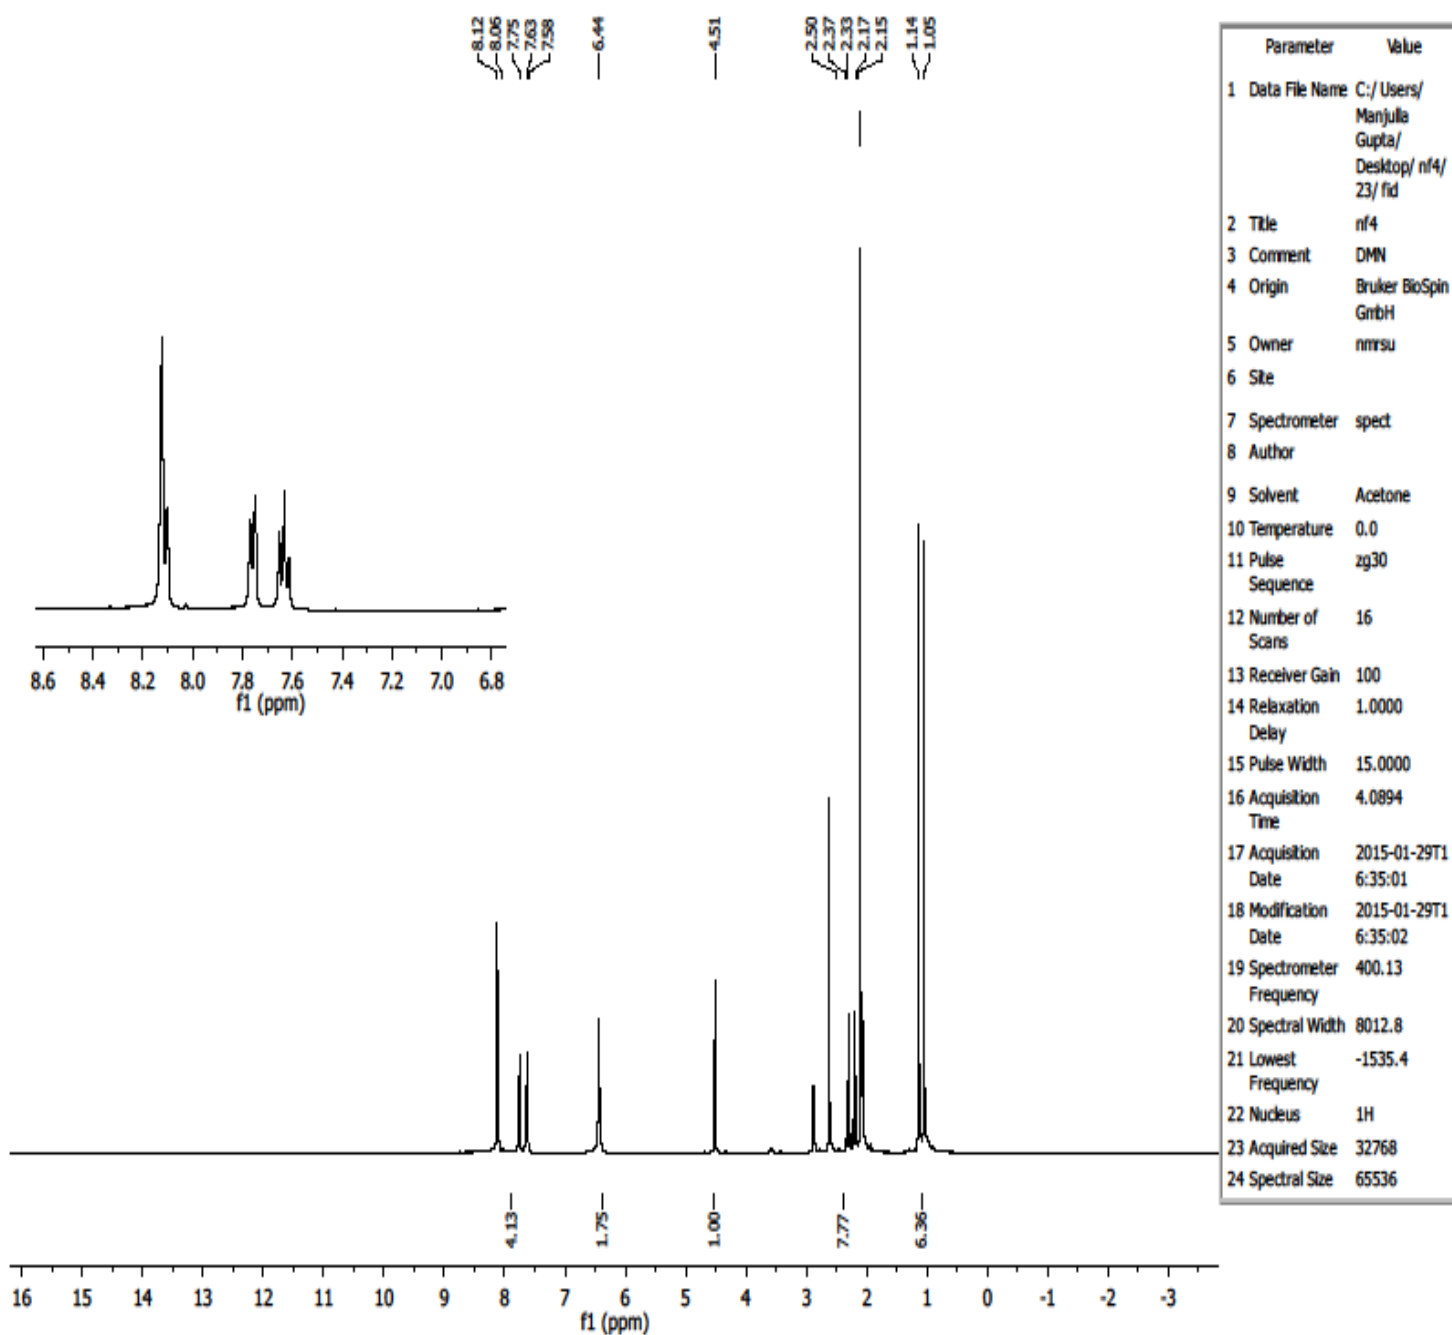

**Fig. 12**  $^1\text{H}$  NMR spectra of 2-amino-4-(3-nitrophenyl)-6,6,8,8-tetrahydro-7,7-dimethyl-5-oxo-4H-chromene-3-carbonitrile

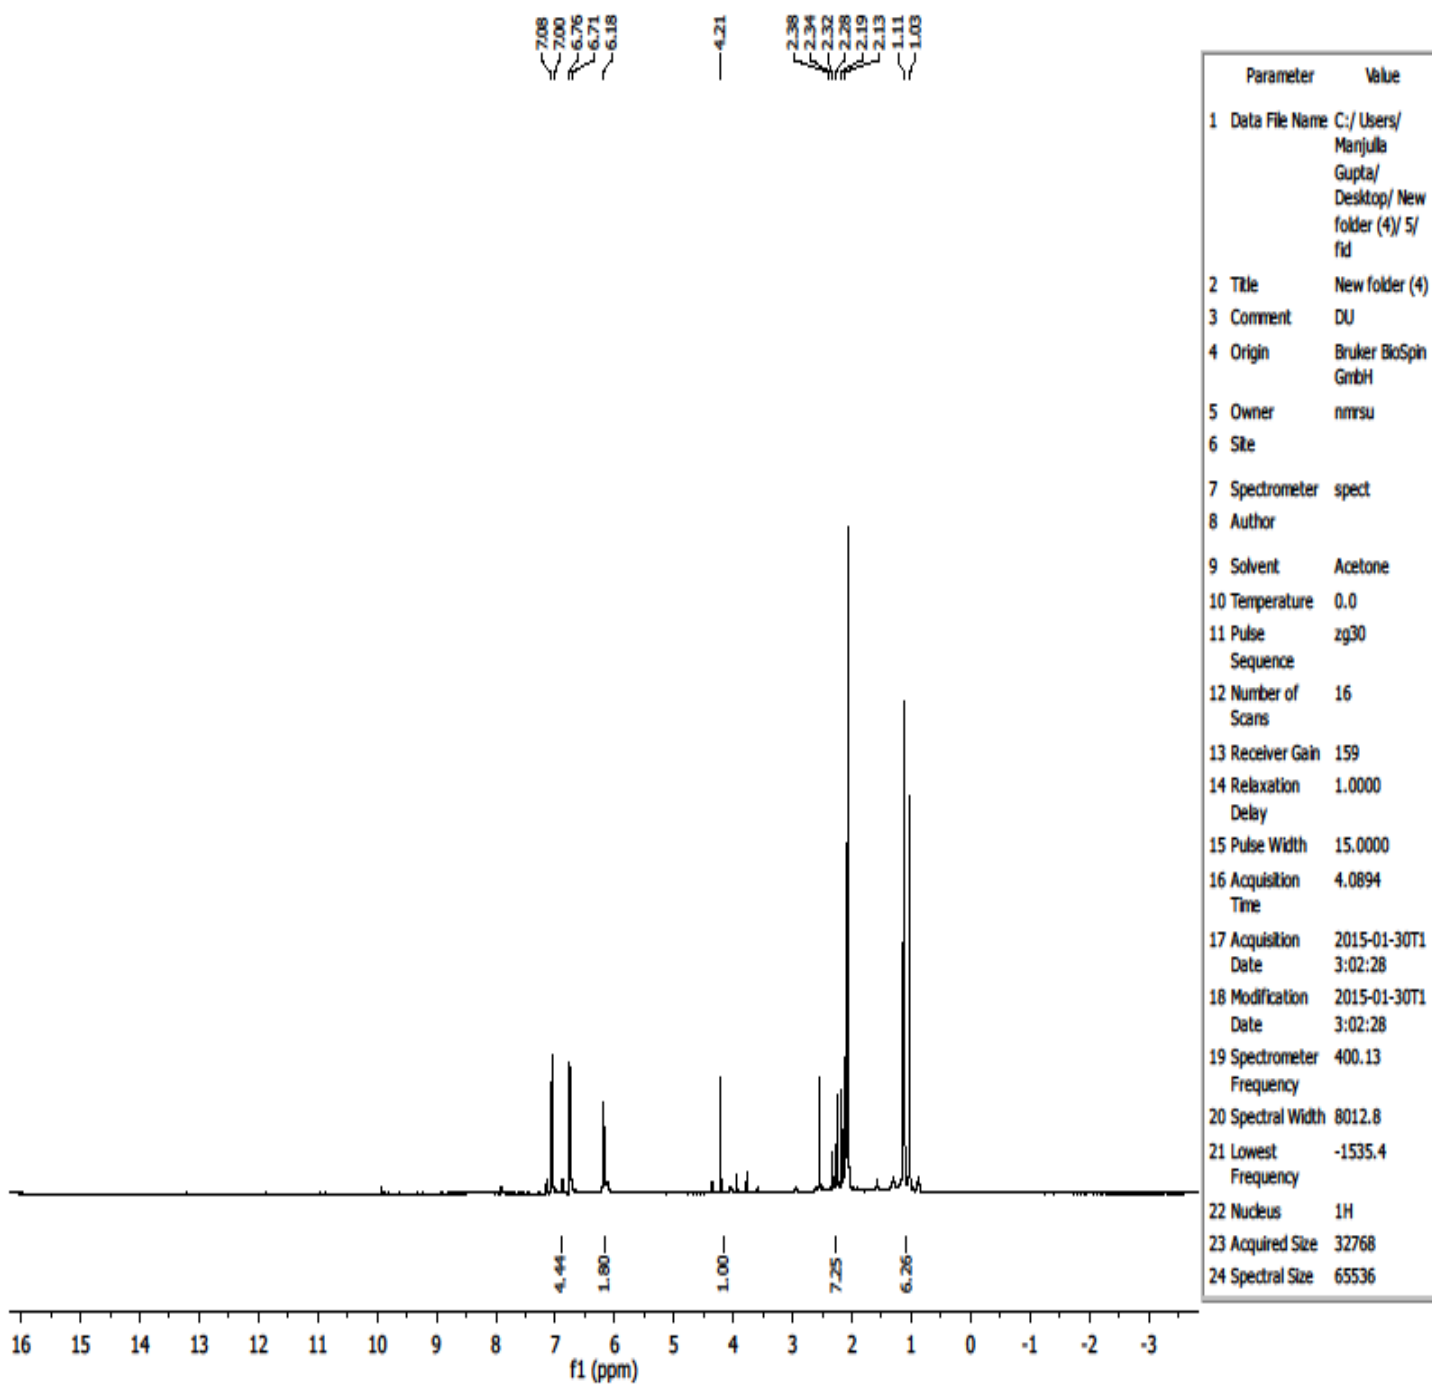

**Fig. 13**  $^1\text{H}$  NMR spectra of 2-amino-4-(2-nitrophenyl)-6,6,8,8-tetrahydro-7,7-dimethyl-5-oxo-4*H*-chromene-3-carbonitrile

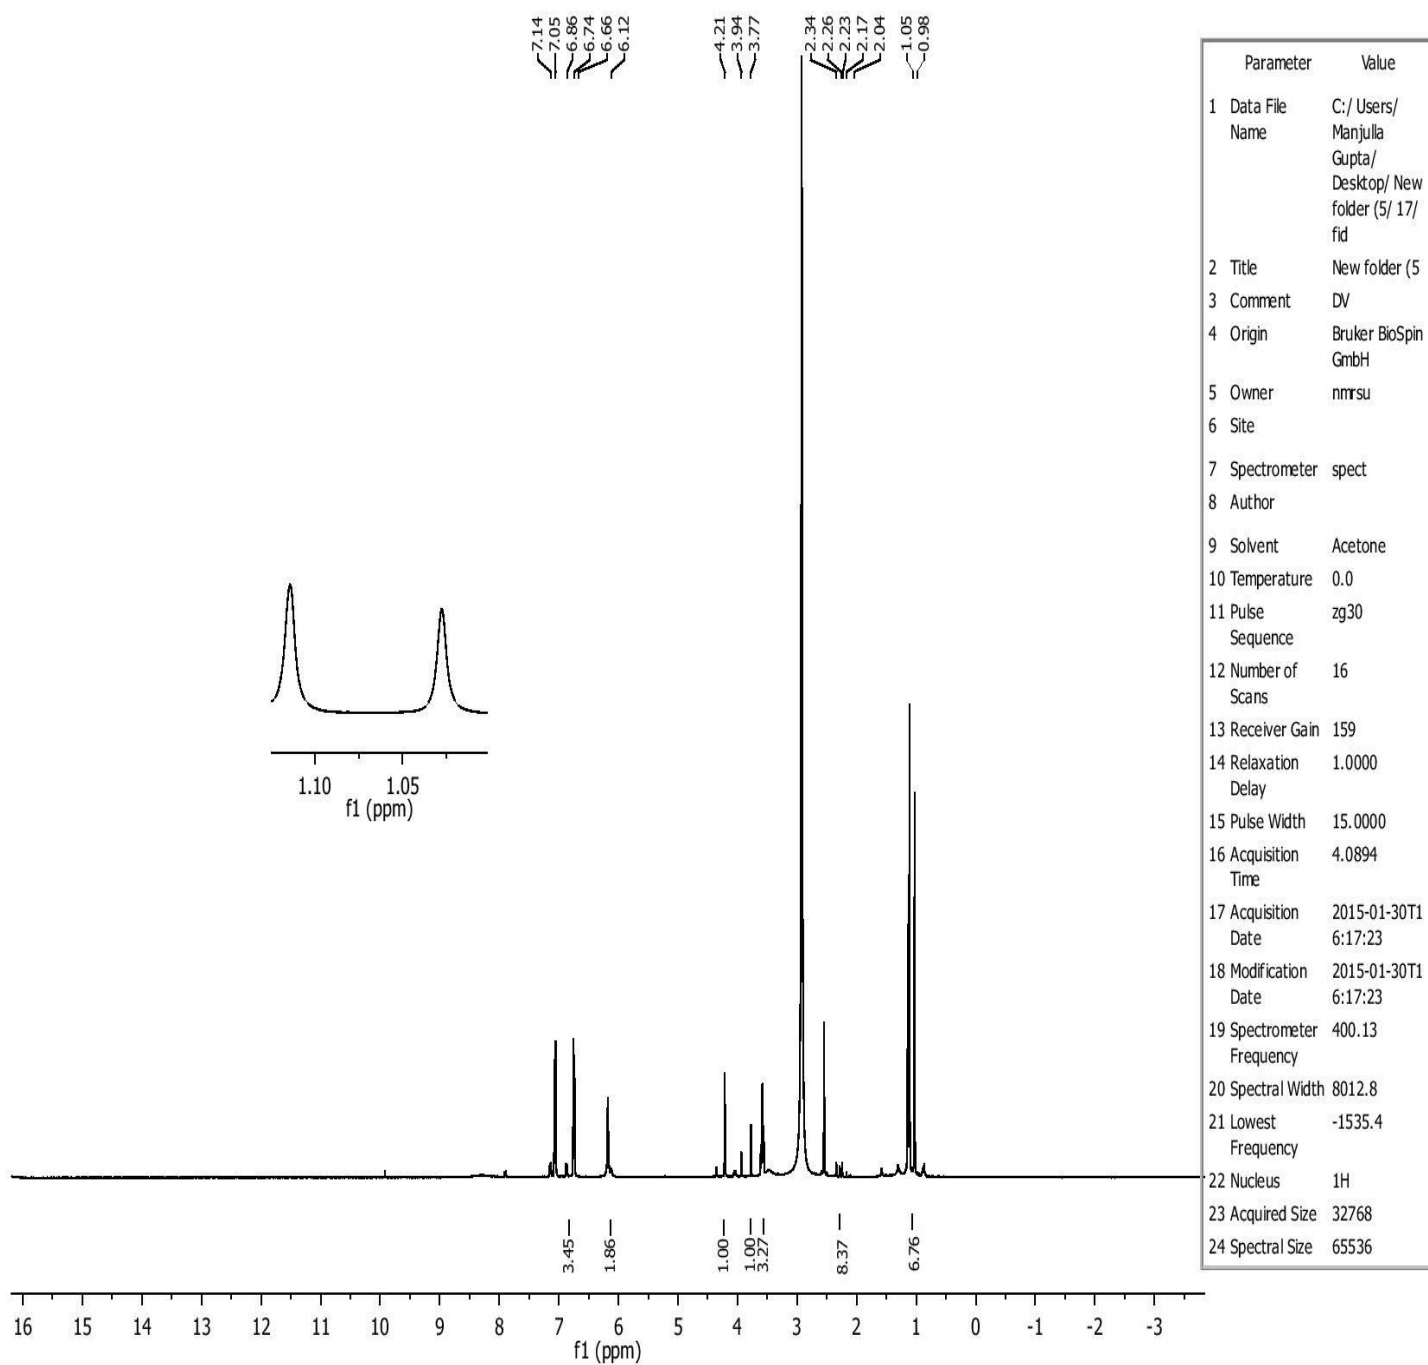

**Fig. 14** <sup>1</sup>H NMR spectra of 2-amino-4-(4-hydroxy-3-methoxyphenyl)-6,6,8,8-tetrahydro-7,7-dimethyl-5-oxo-4H-chromene-3-carbonitrile

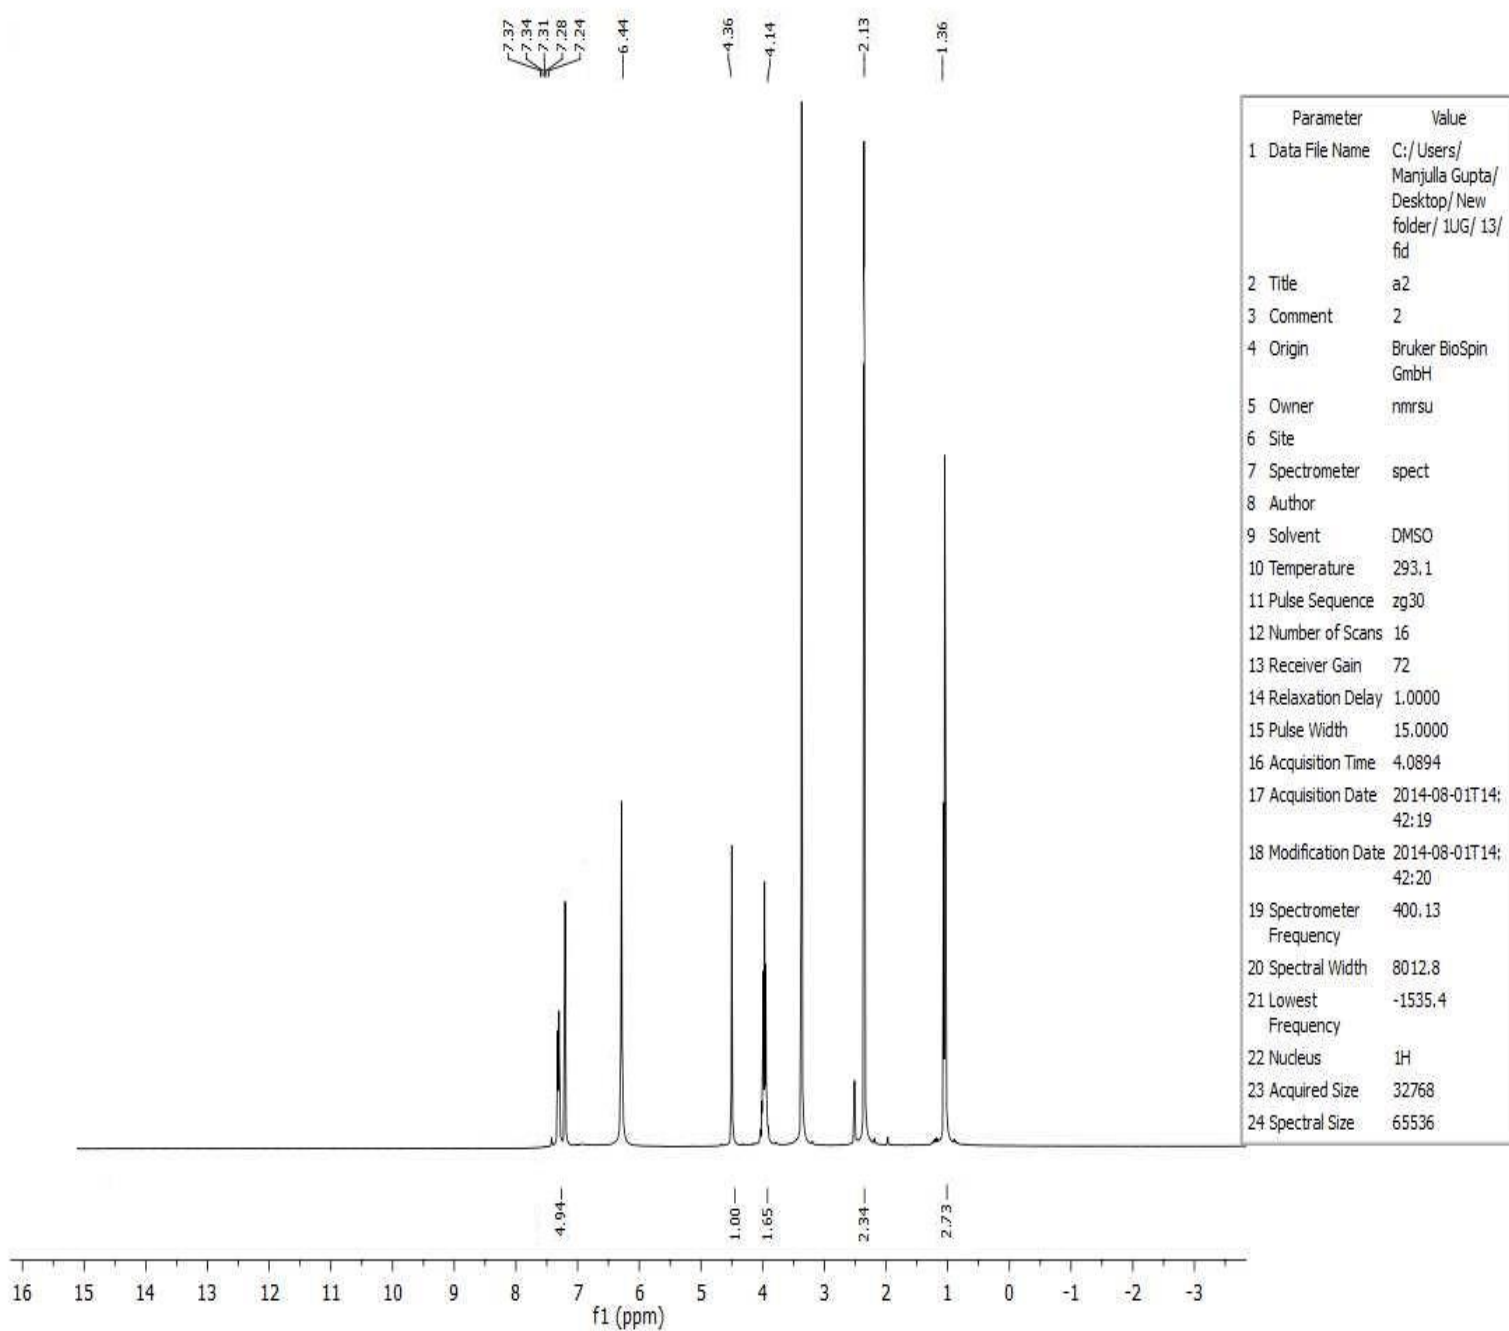

**Fig. 15**  $^1\text{H}$  NMR spectra of Ethyl-6-amino-5-cyano-2-methyl-4-phenyl-4H-pyran-3-carboxylate

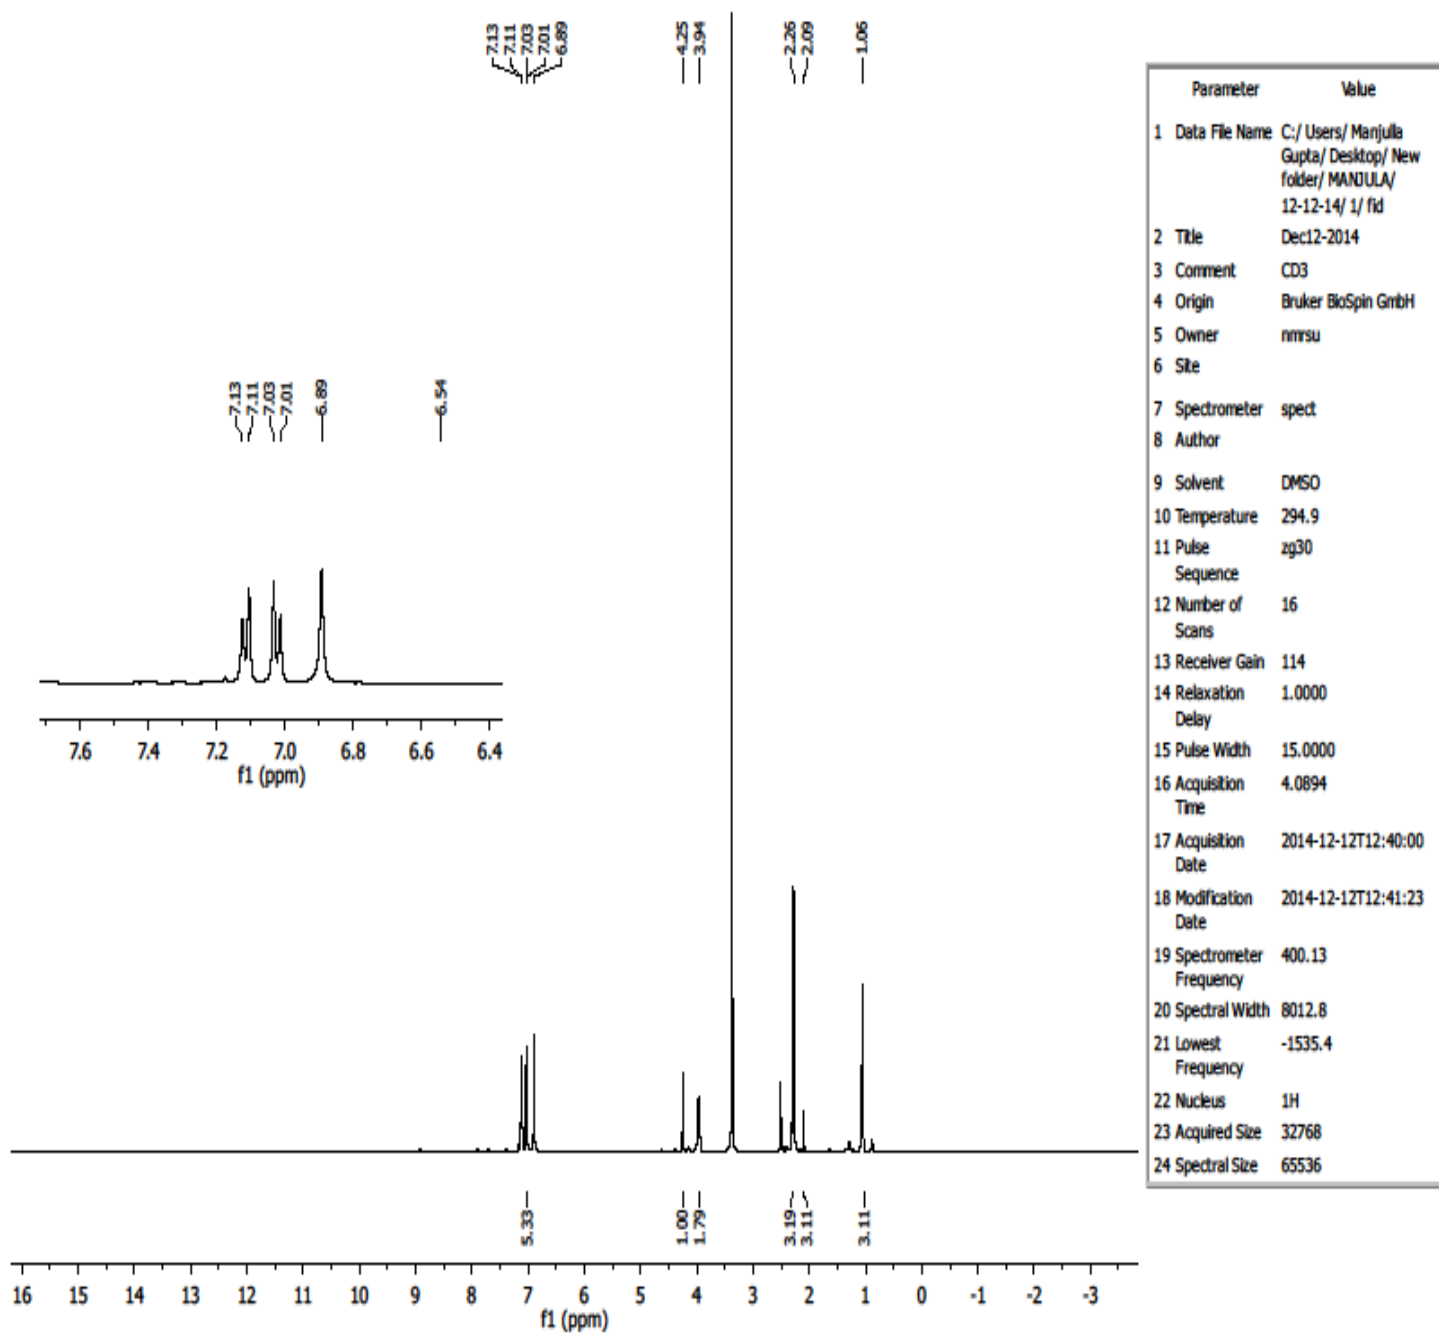

**Fig. 16** <sup>1</sup>H NMR spectra of Ethyl-6-amino-5-cyano-2-methyl-4-*p*-tolyl-4*H*-pyran-3-carboxylate



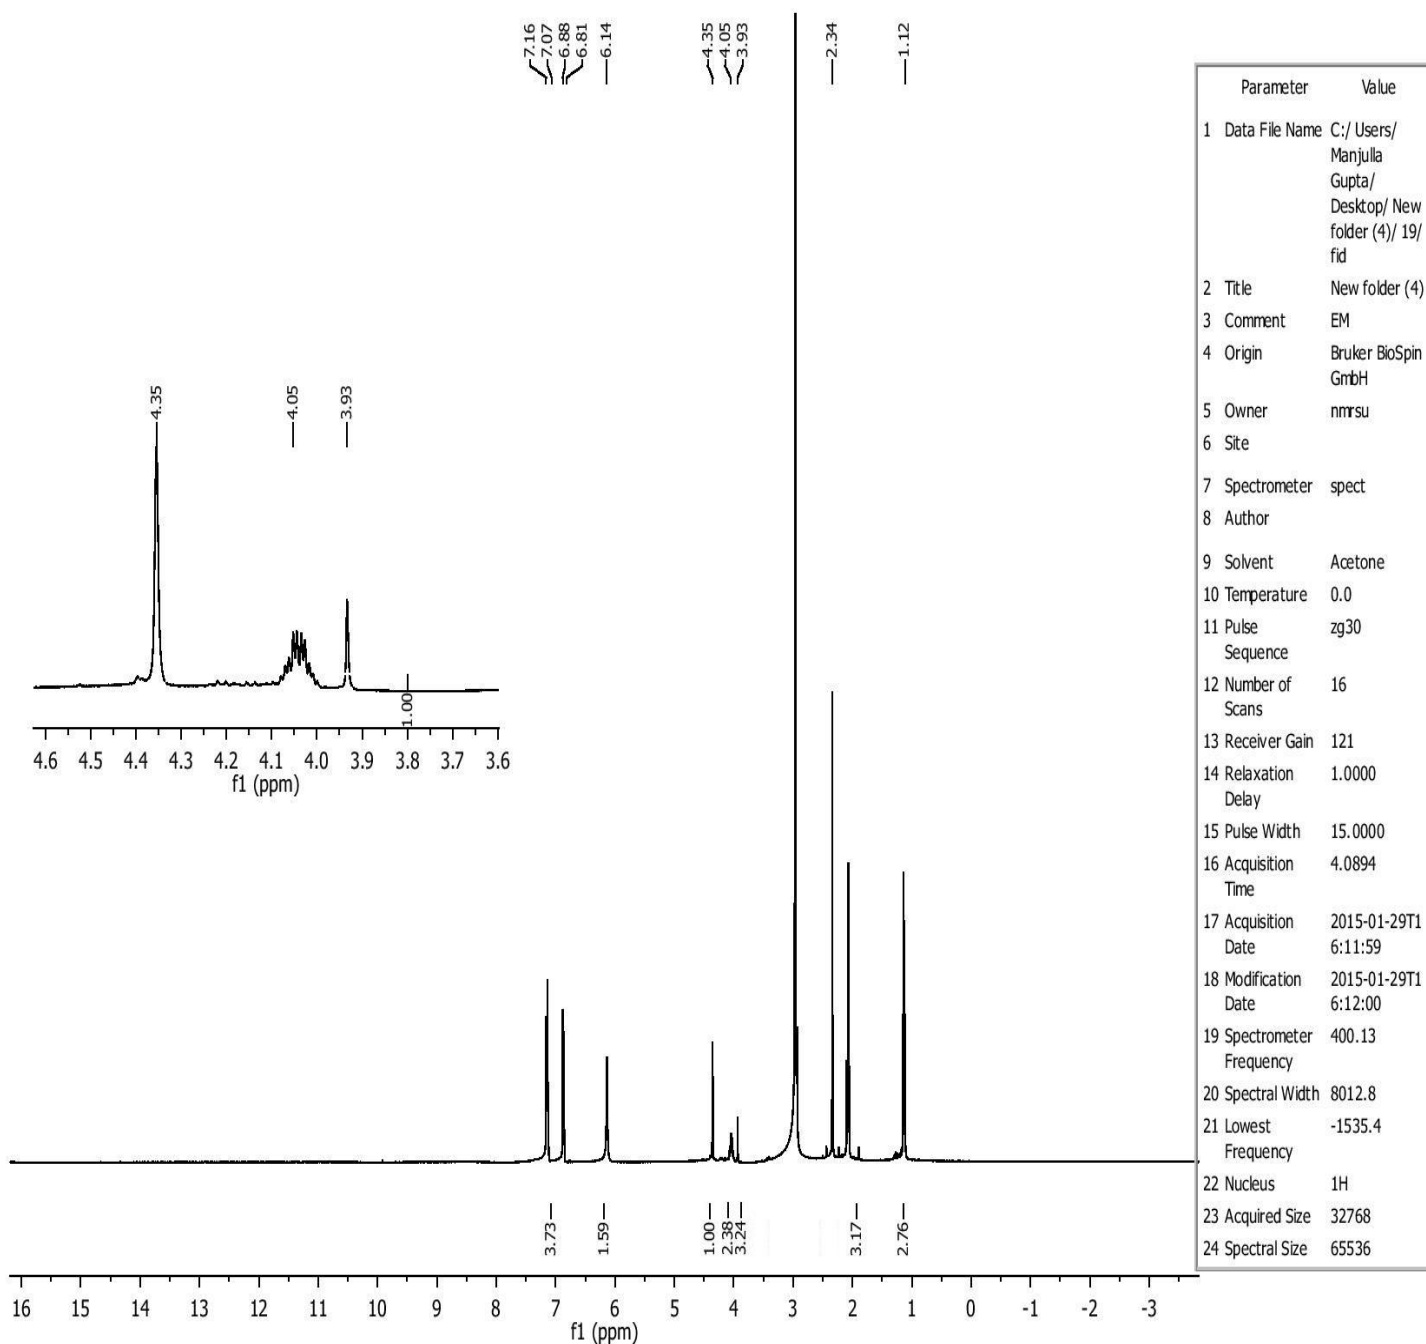

**Fig. 17**  $^1\text{H}$  NMR spectra of Ethyl-6-amino-4-(4-methoxyphenyl)-5-cyano-2-methyl-4*H*-pyran-3-carboxylate

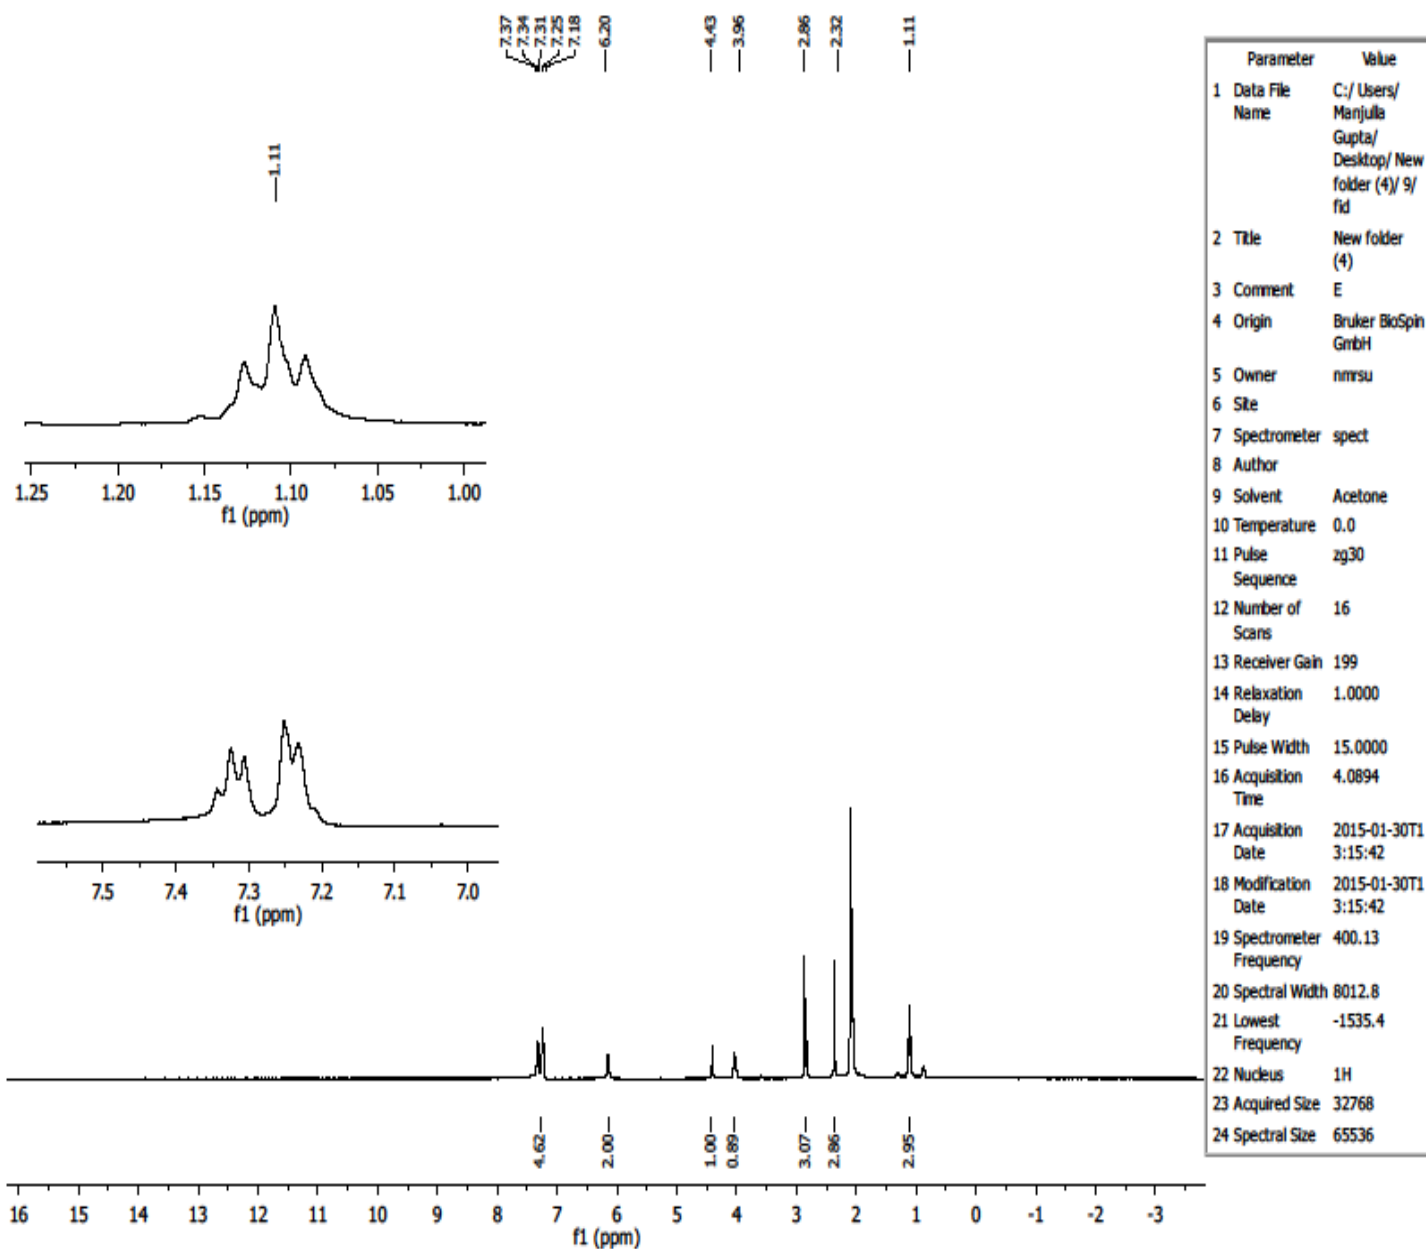

**Fig. 18**  $^1\text{H}$  NMR spectra of Ethyl-6-amino-4-(4-hydroxyphenyl)-5-cyano-2-methyl-4*H*-pyran-3-carboxylate

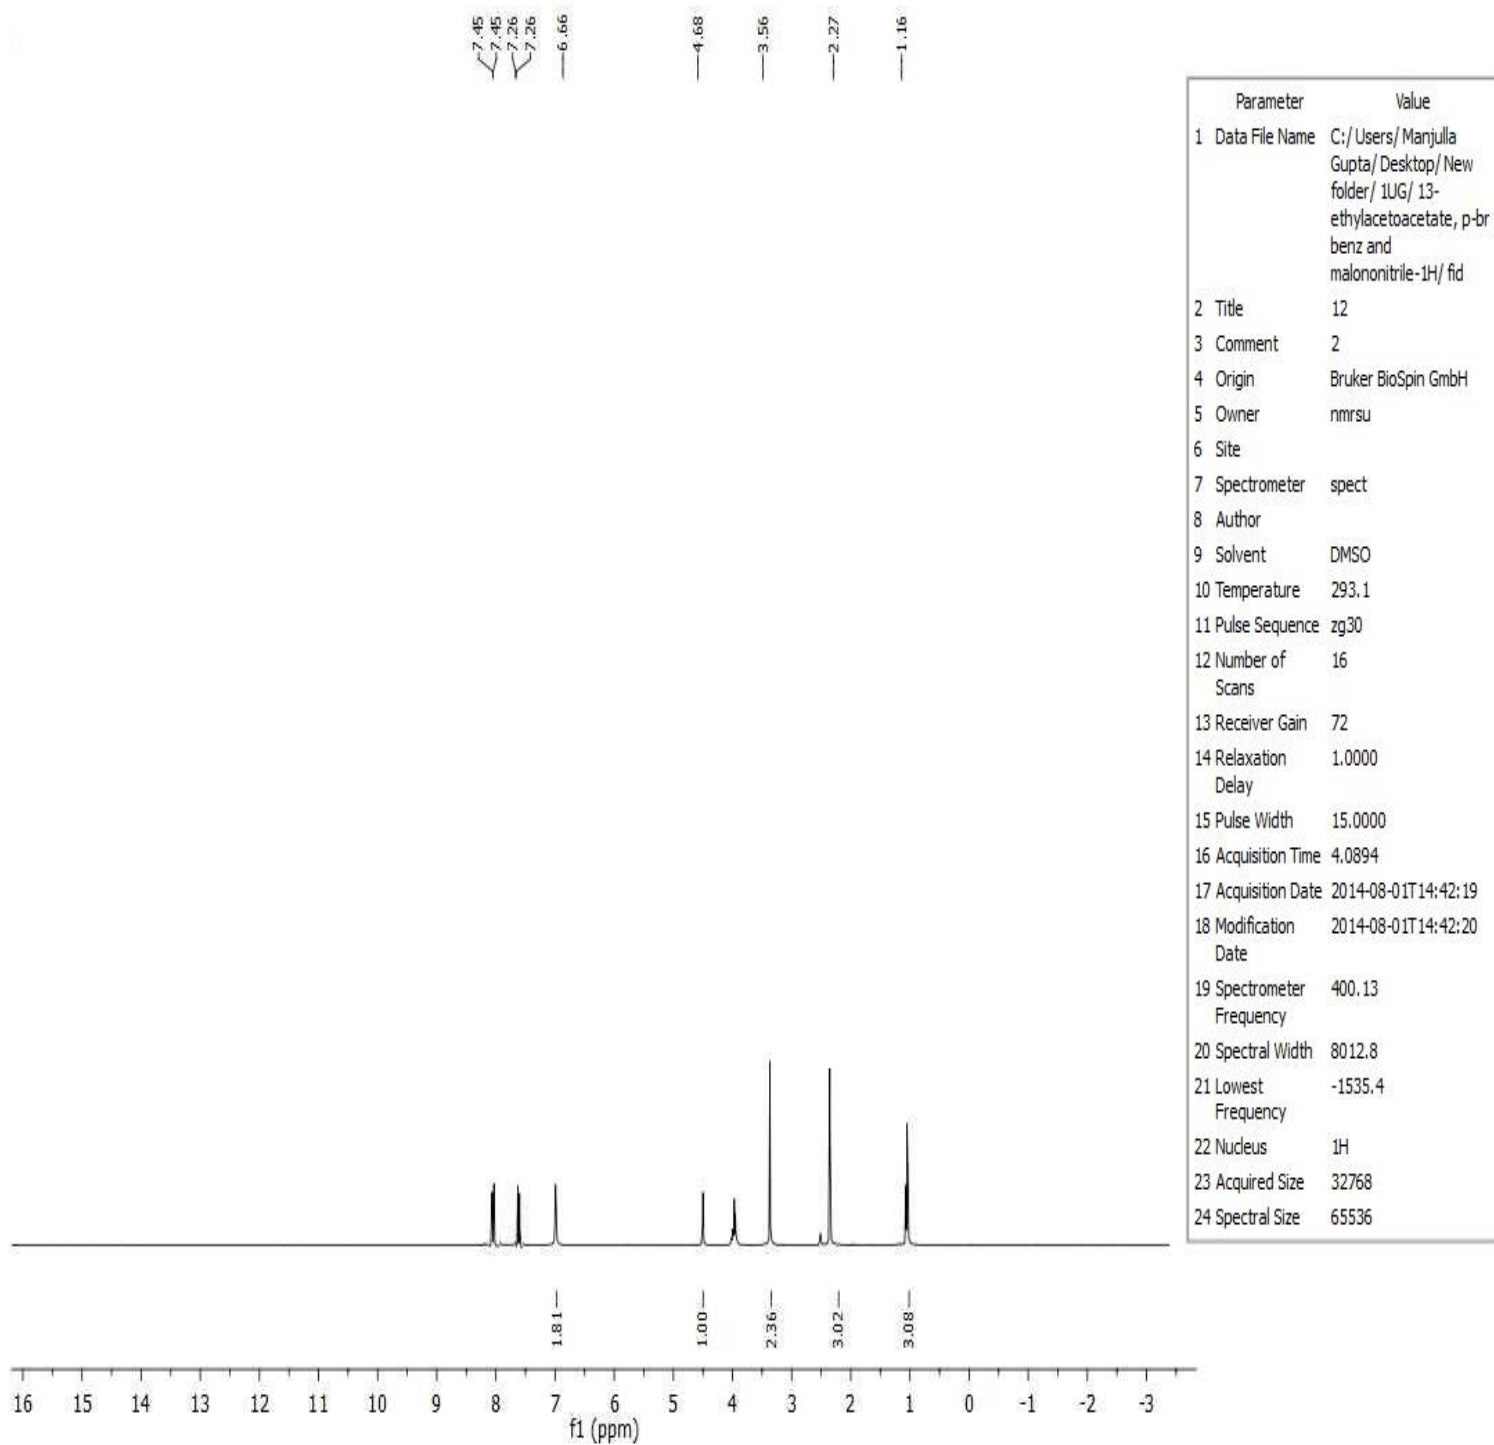

**Fig. 19**  $^1\text{H}$  NMR spectra of Ethyl-6-amino-4-(4-bromophenyl)-5-cyano-2-methyl-4*H*-pyran-3-carboxylate

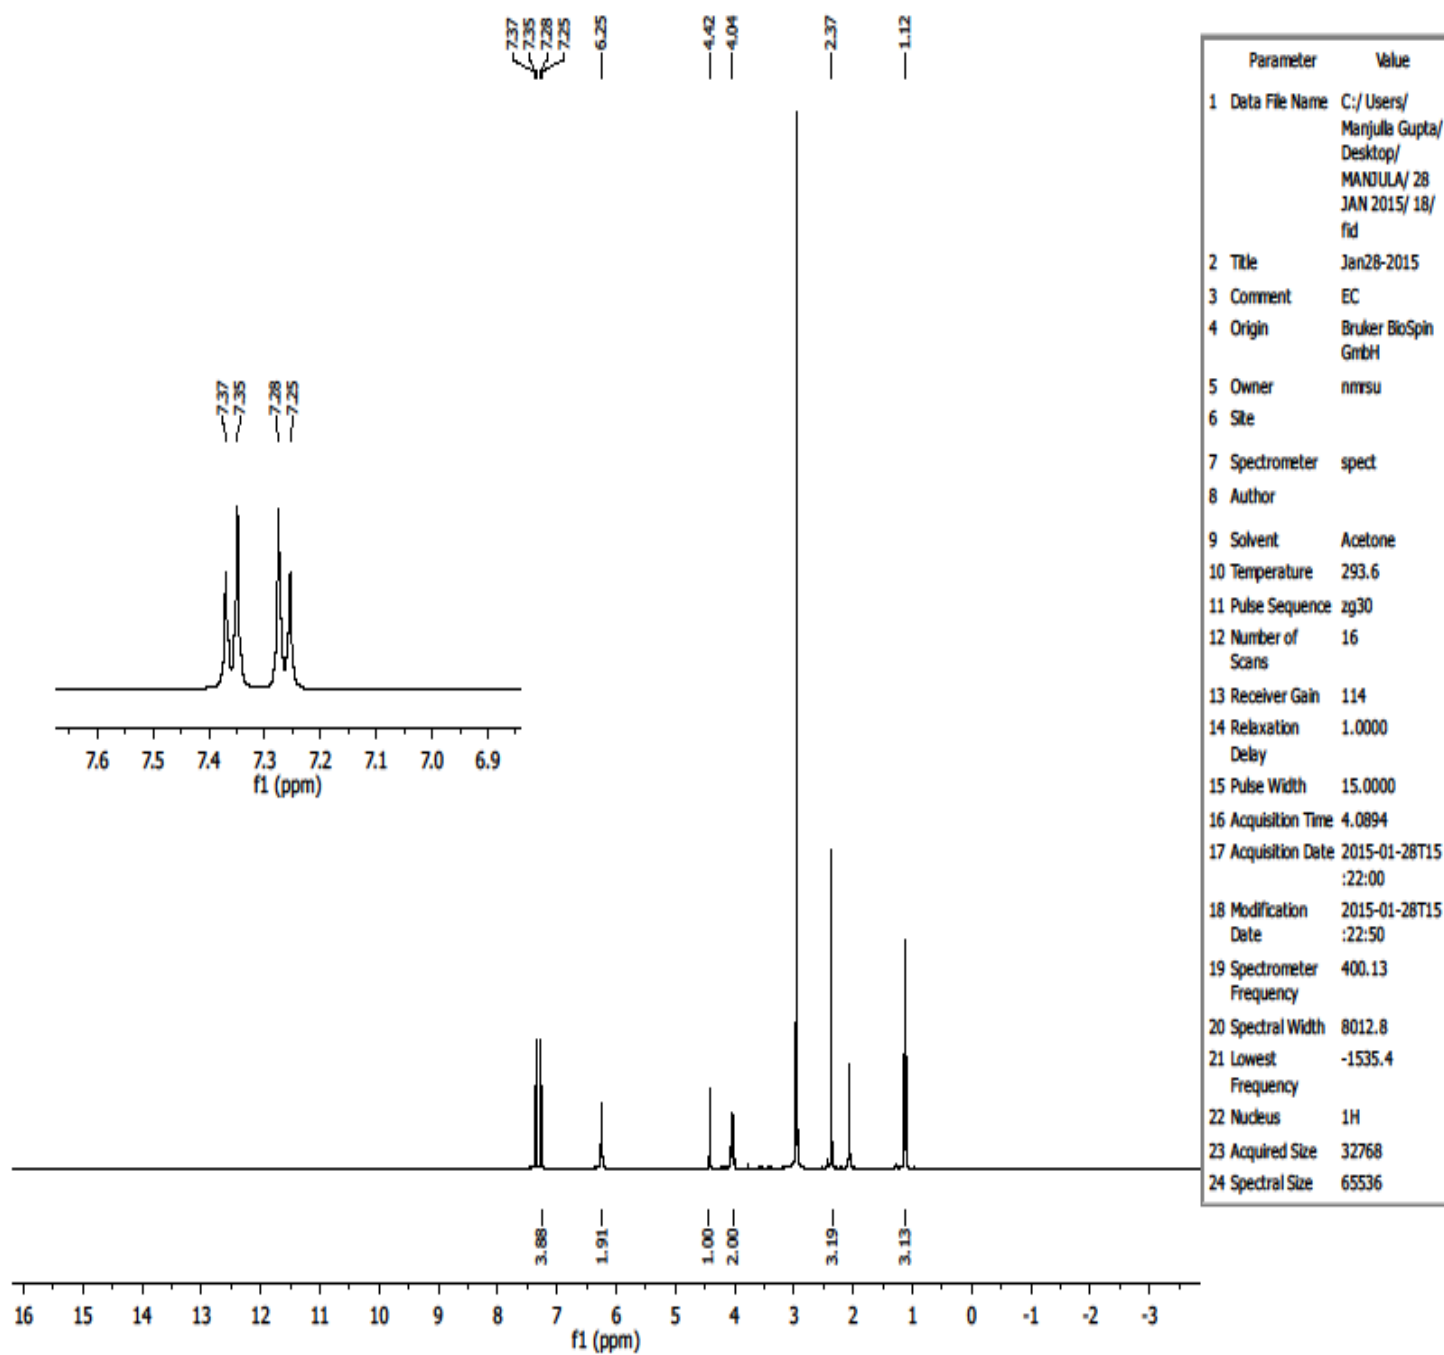

**Fig. 20** <sup>1</sup>H NMR spectra of Ethyl-6-amino-4-(4-chlorophenyl)-5-cyano-2-methyl-4*H*-pyran-3-carboxylate

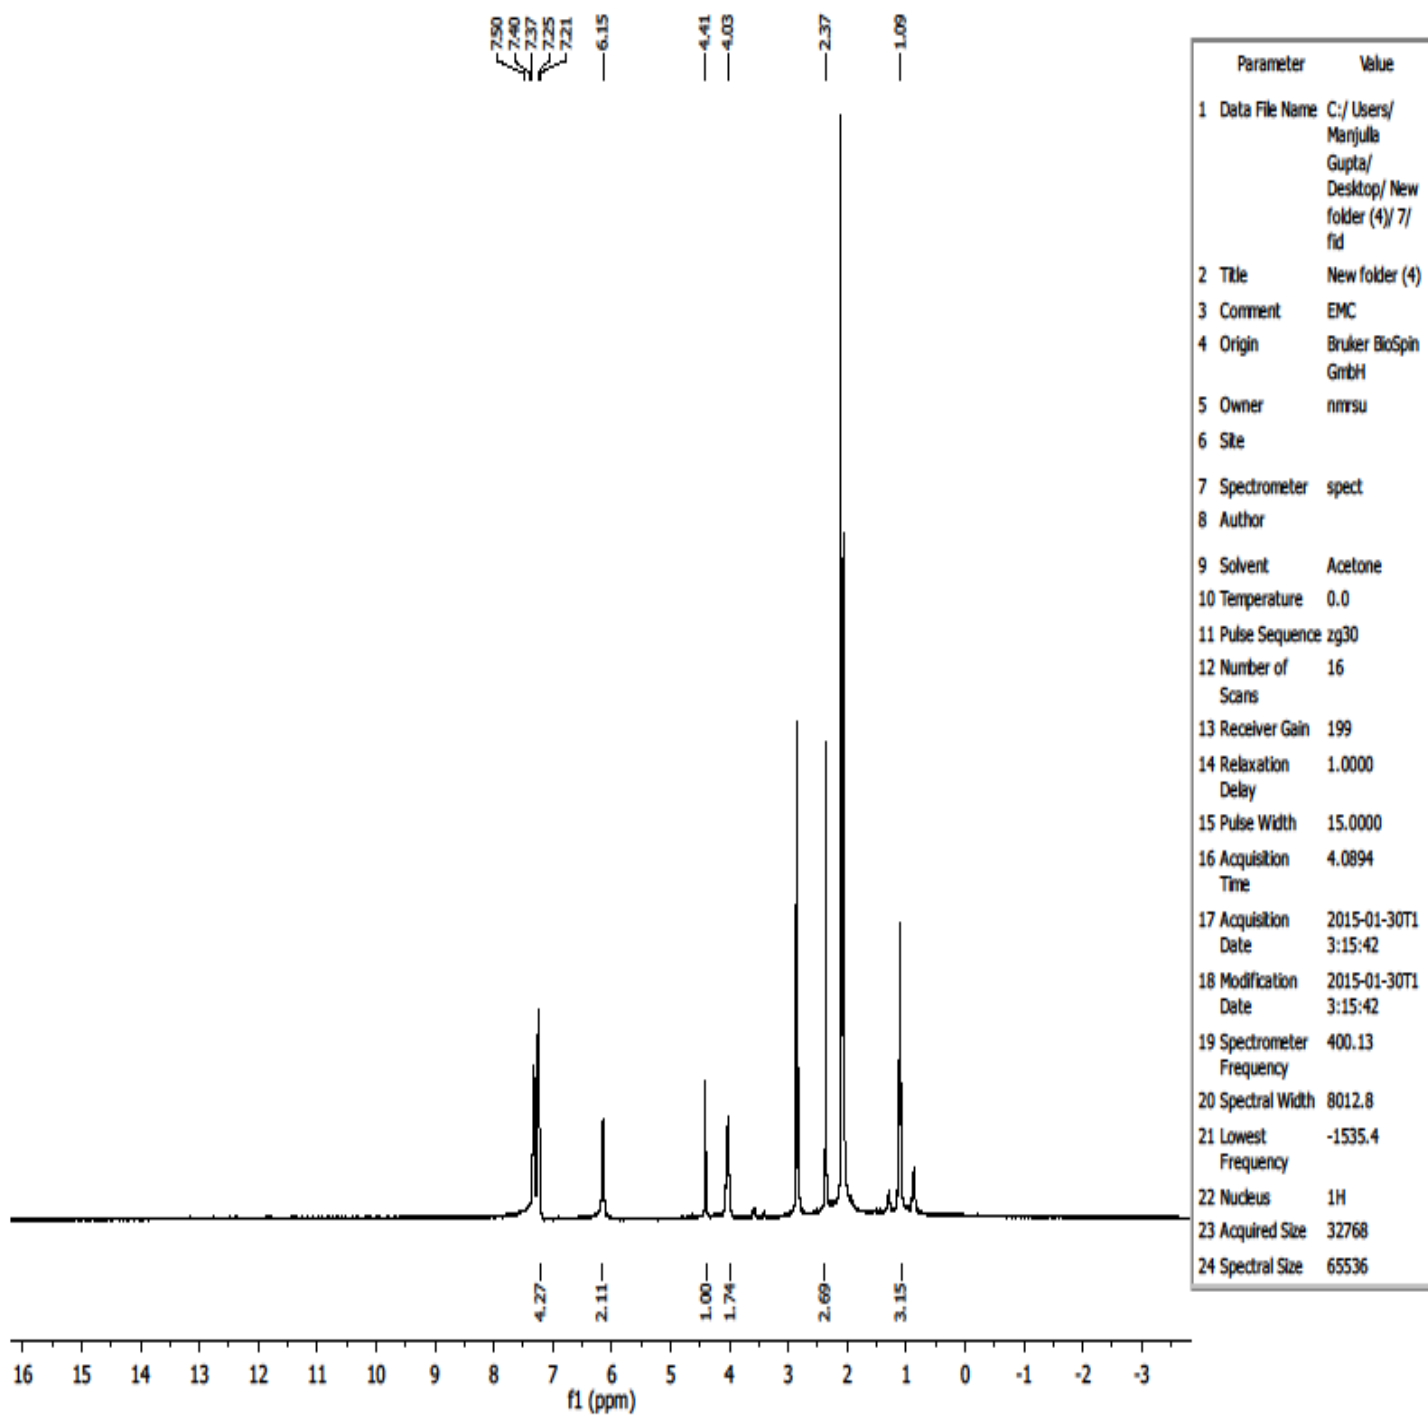

**Fig. 21**  $^1\text{H}$  NMR spectra of Ethyl-6-amino-4-(2-chlorophenyl)-5-cyano-2-methyl-4*H*-pyran-3-carboxylate

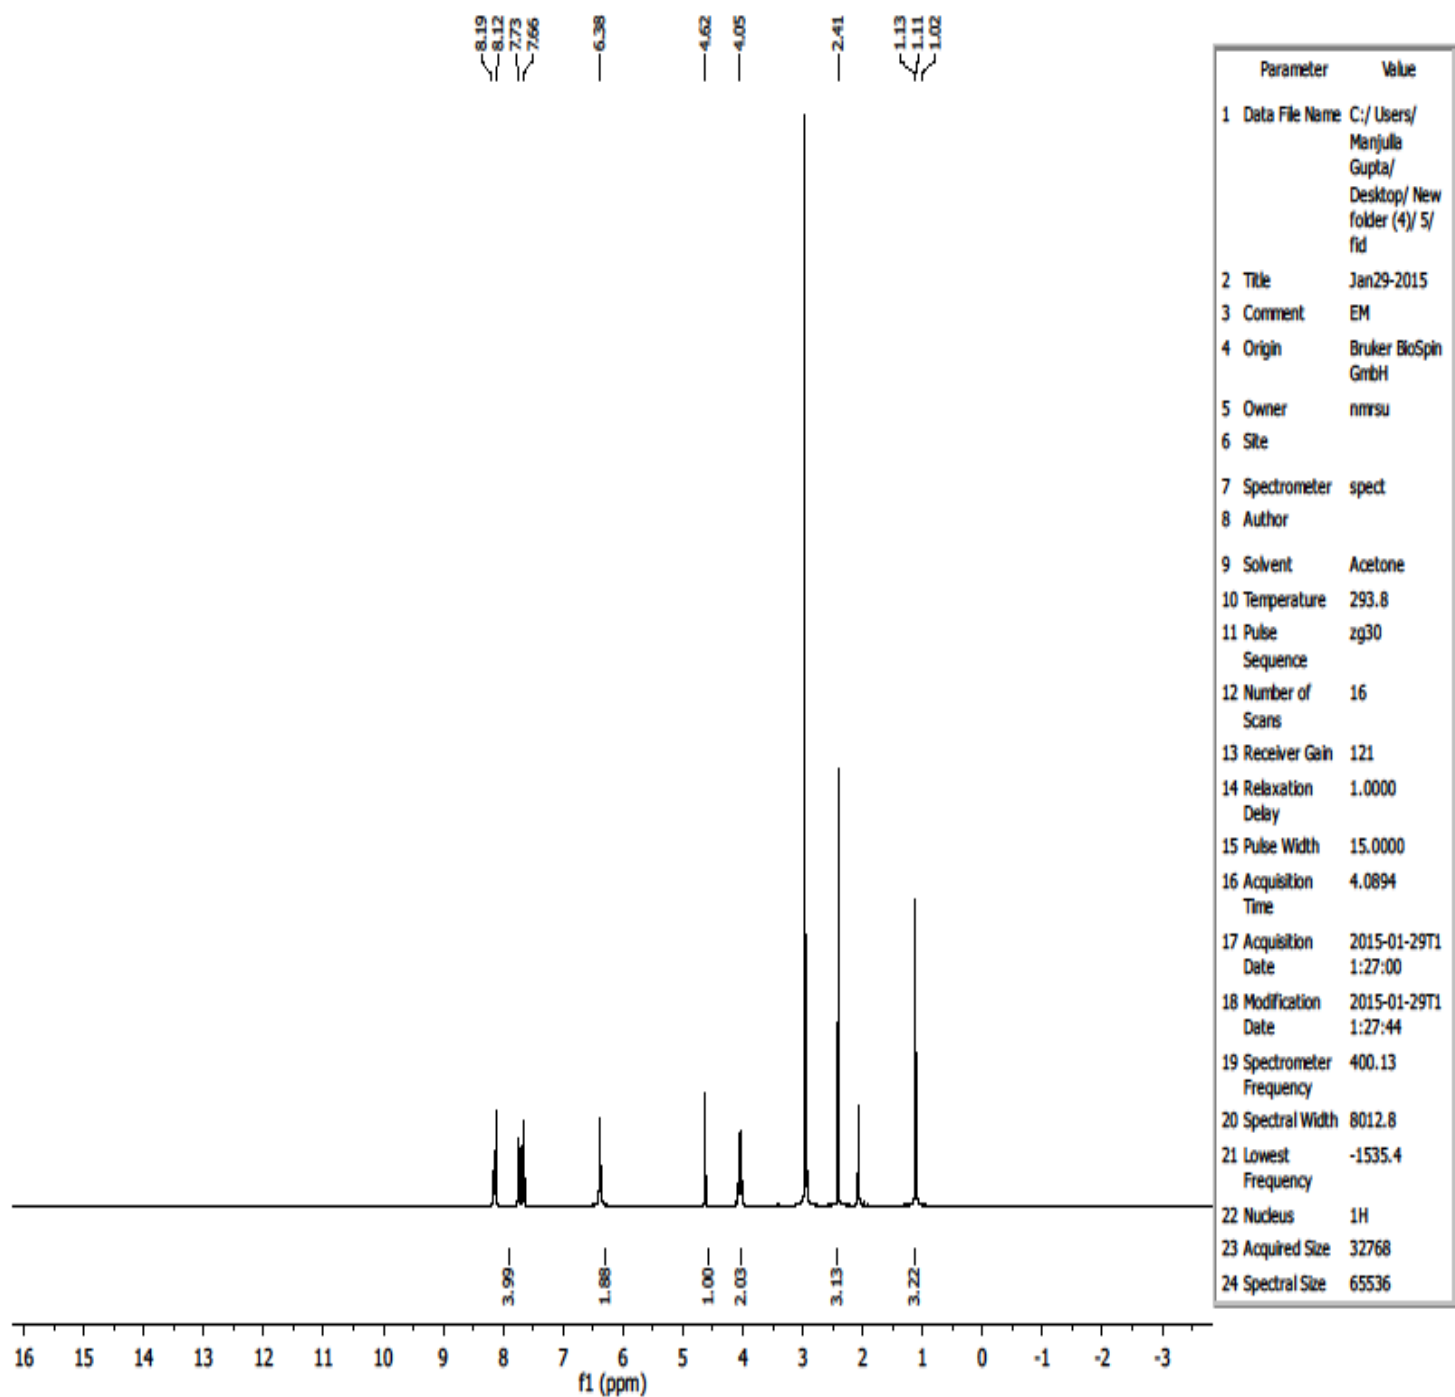

**Fig. 22**  $^1\text{H}$  NMR spectra of Ethyl-6-amino-4-(4-nitrophenyl)-5-cyano-2-methyl-4*H*-pyran-3-carboxylate

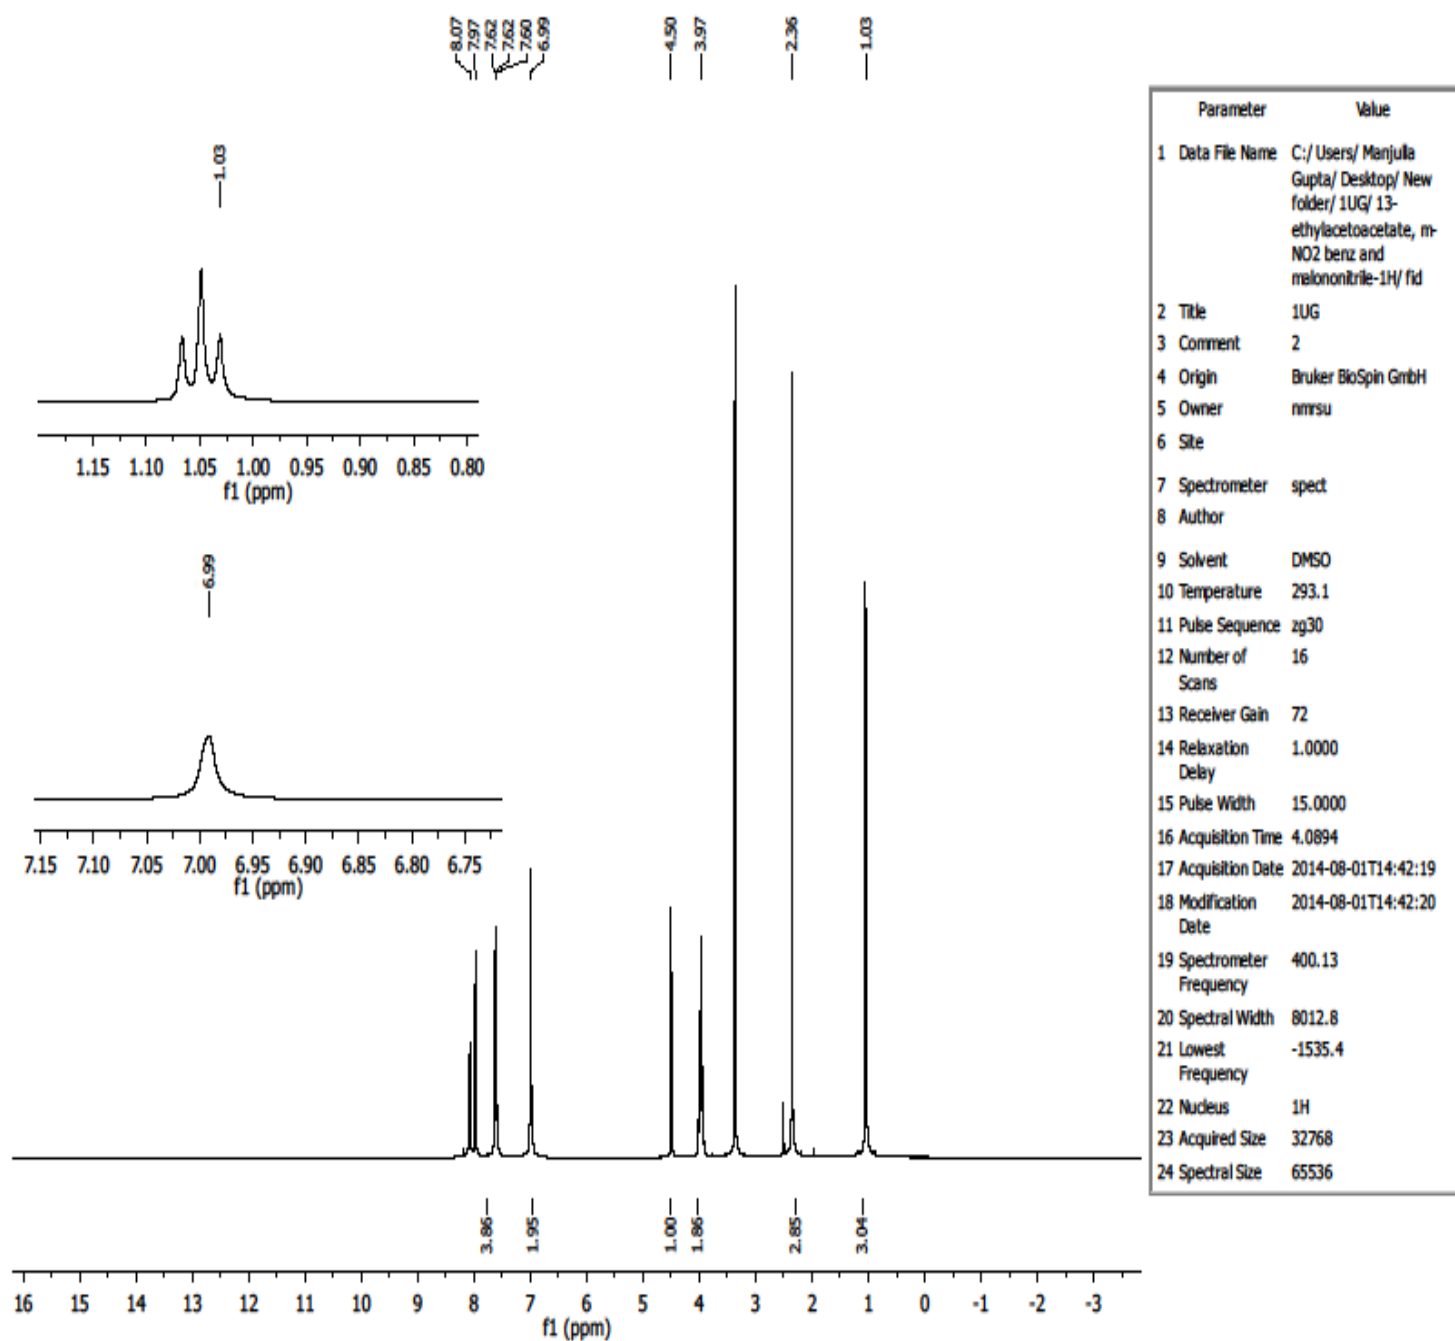

**Fig. 23**  $^1\text{H}$  NMR spectra of Ethyl-6-amino-4-(3-nitrophenyl)-5-cyano-2-methyl-4*H*-pyran-3-carboxylate

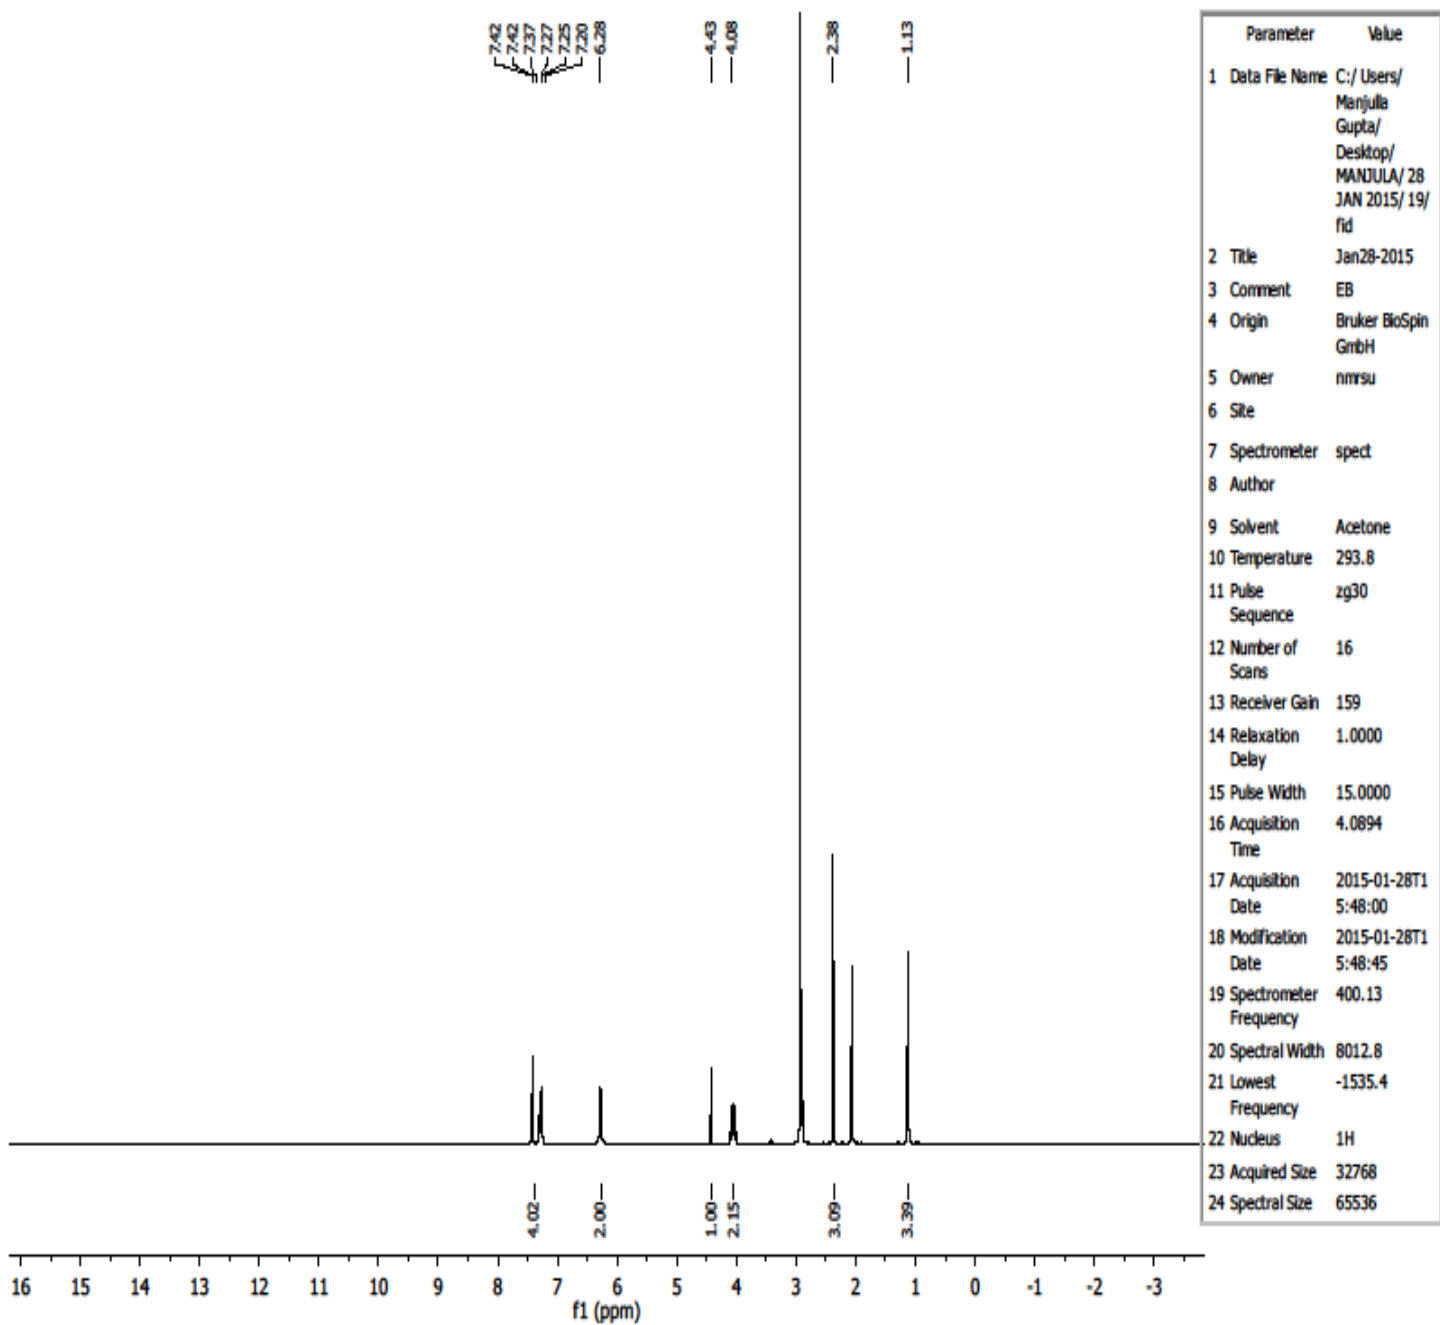

**Fig. 24**  $^1\text{H}$  NMR spectra of Ethyl-6-amino-4-(2-nitrophenyl)-5-cyano-2-methyl-4*H*-pyran-3-carboxylate



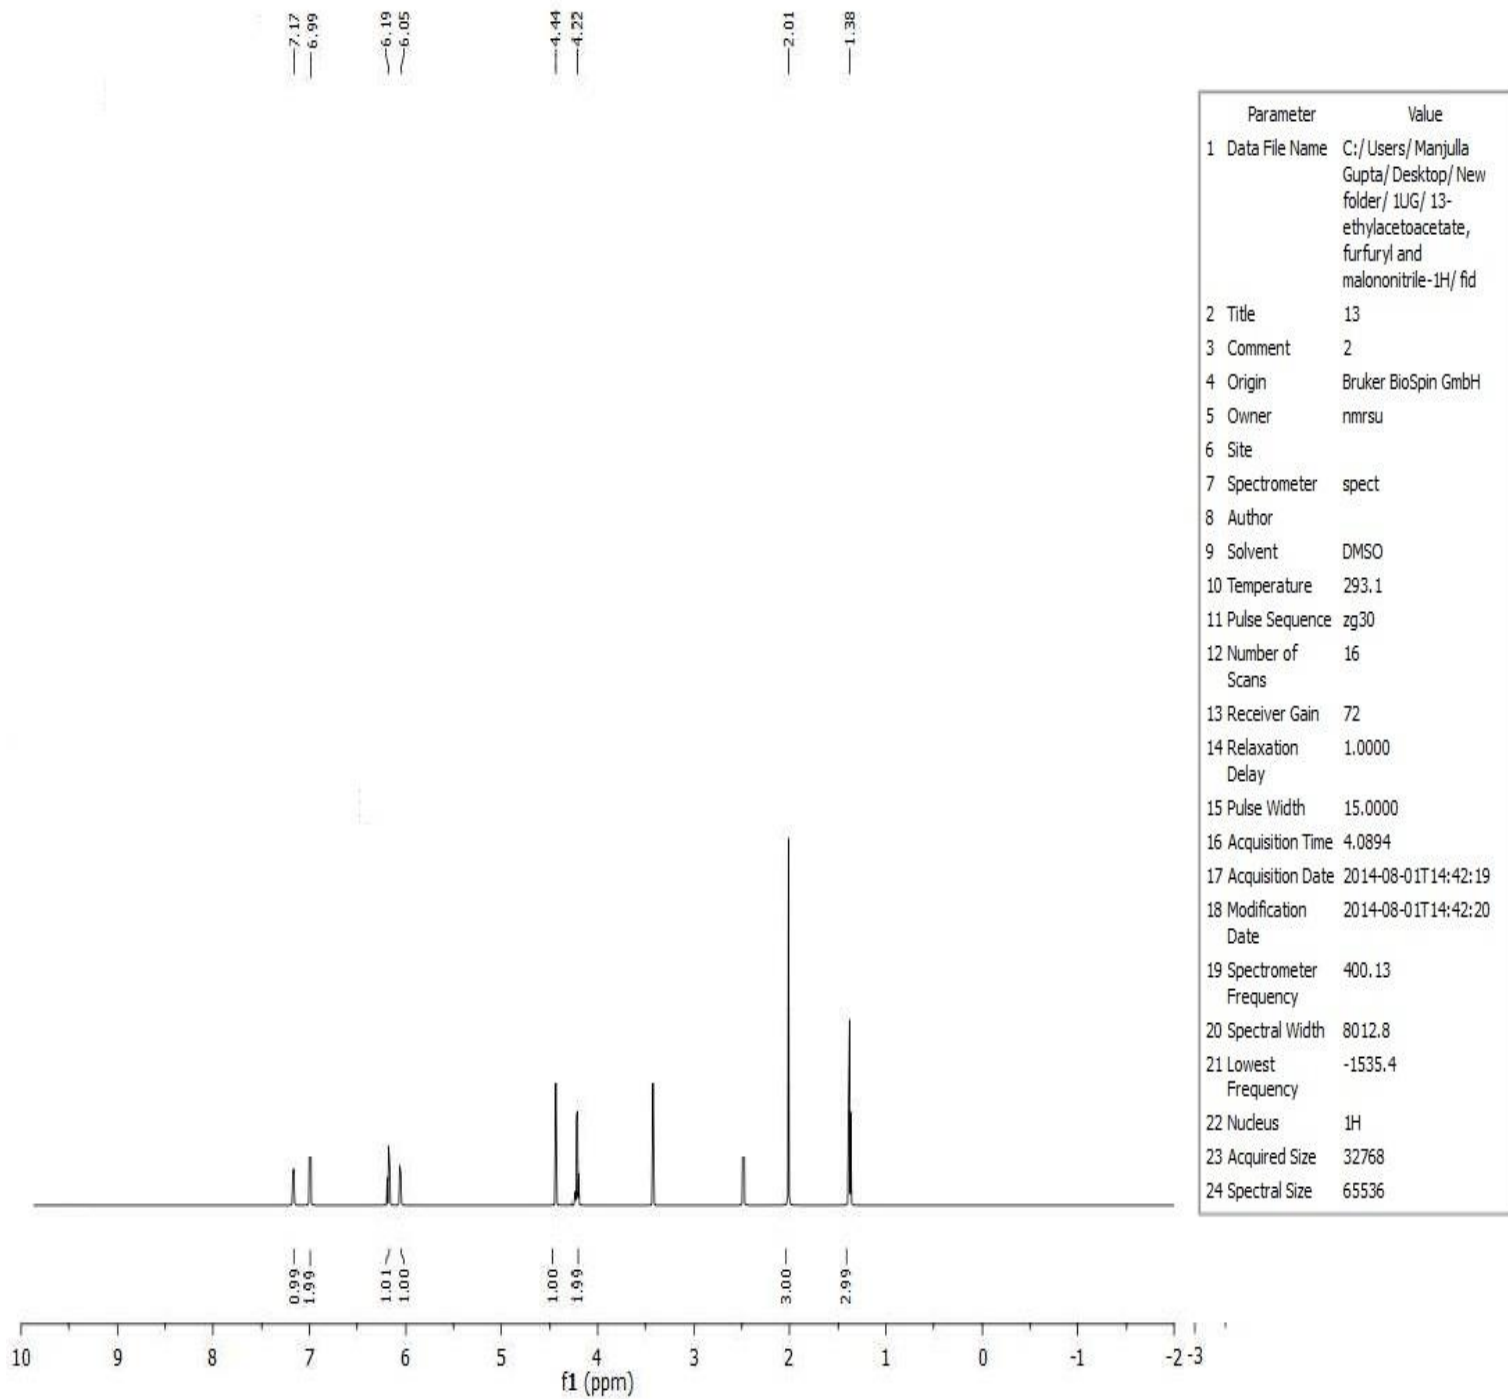

**Fig. 25**  $^1\text{H}$  NMR spectra of Ethyl-6-amino-5-cyano-4-(furan-2-yl)-2-methyl-4*H*-pyran-3-carboxylate

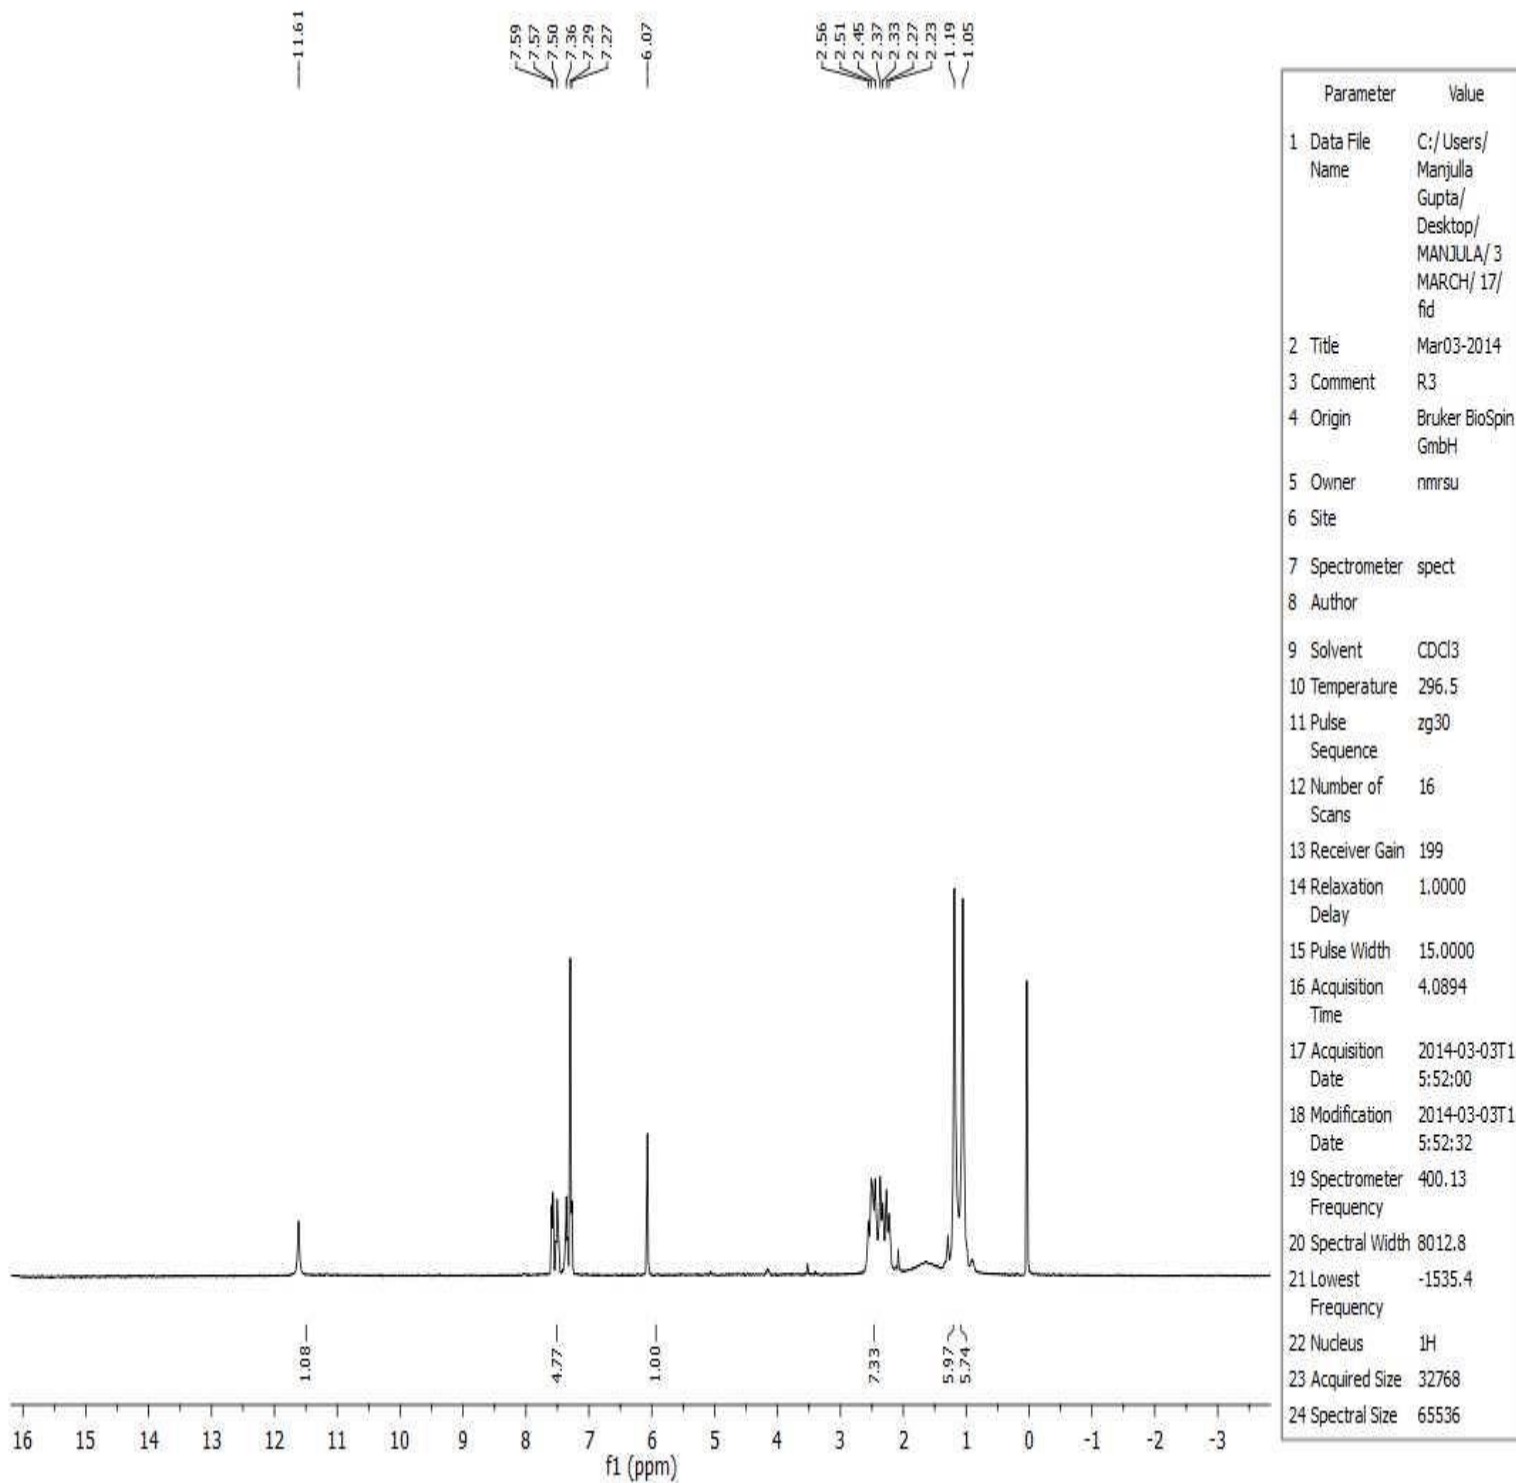

**Fig. 26**  $^1\text{H}$  NMR spectra of 3,3,6,6-Tetramethyl-9-phenyl-1,8-dioxodecahydroacridine

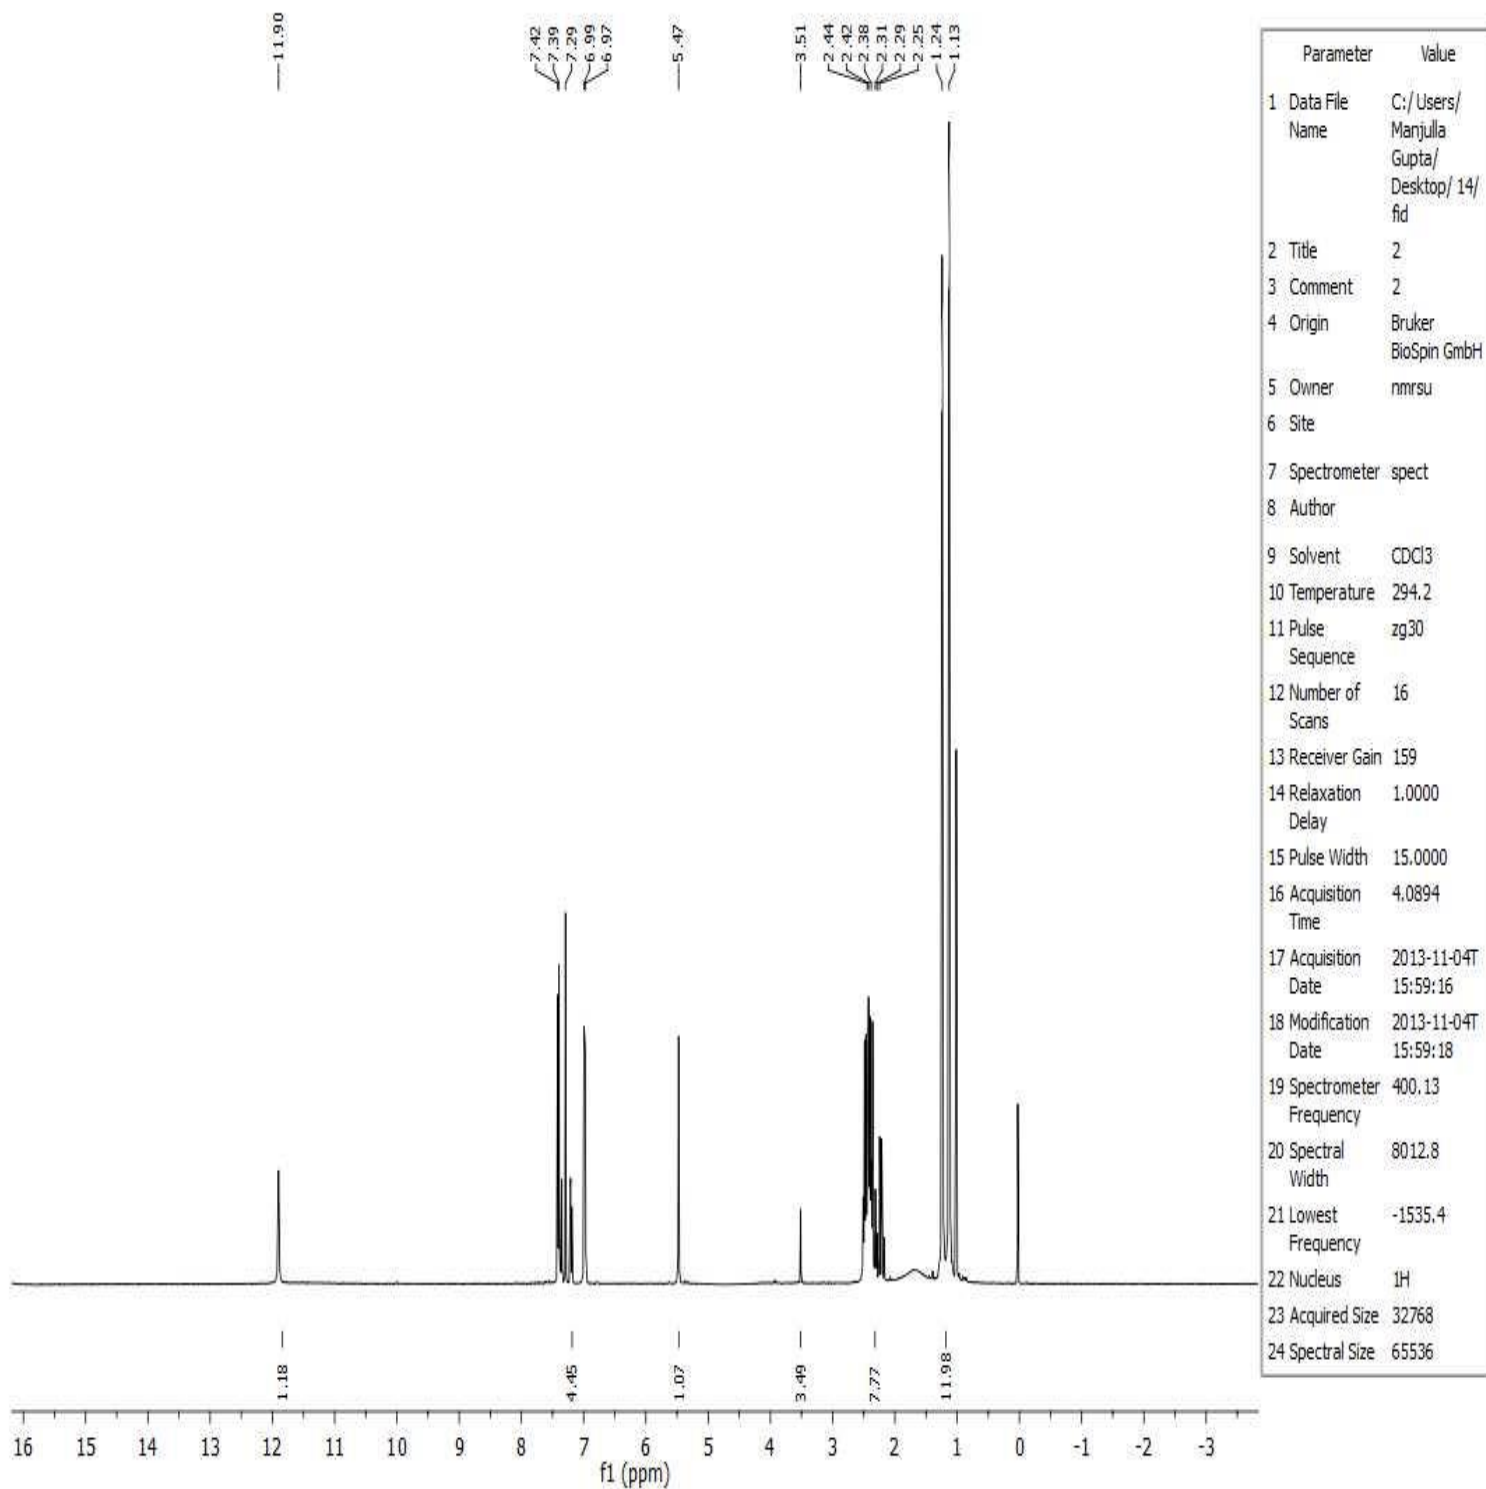

**Fig. 27** <sup>1</sup>H NMR spectra of 3,3,6,6-Tetramethyl -9-(4-methylphenyl)-1,8-dioxodecahydroacridine

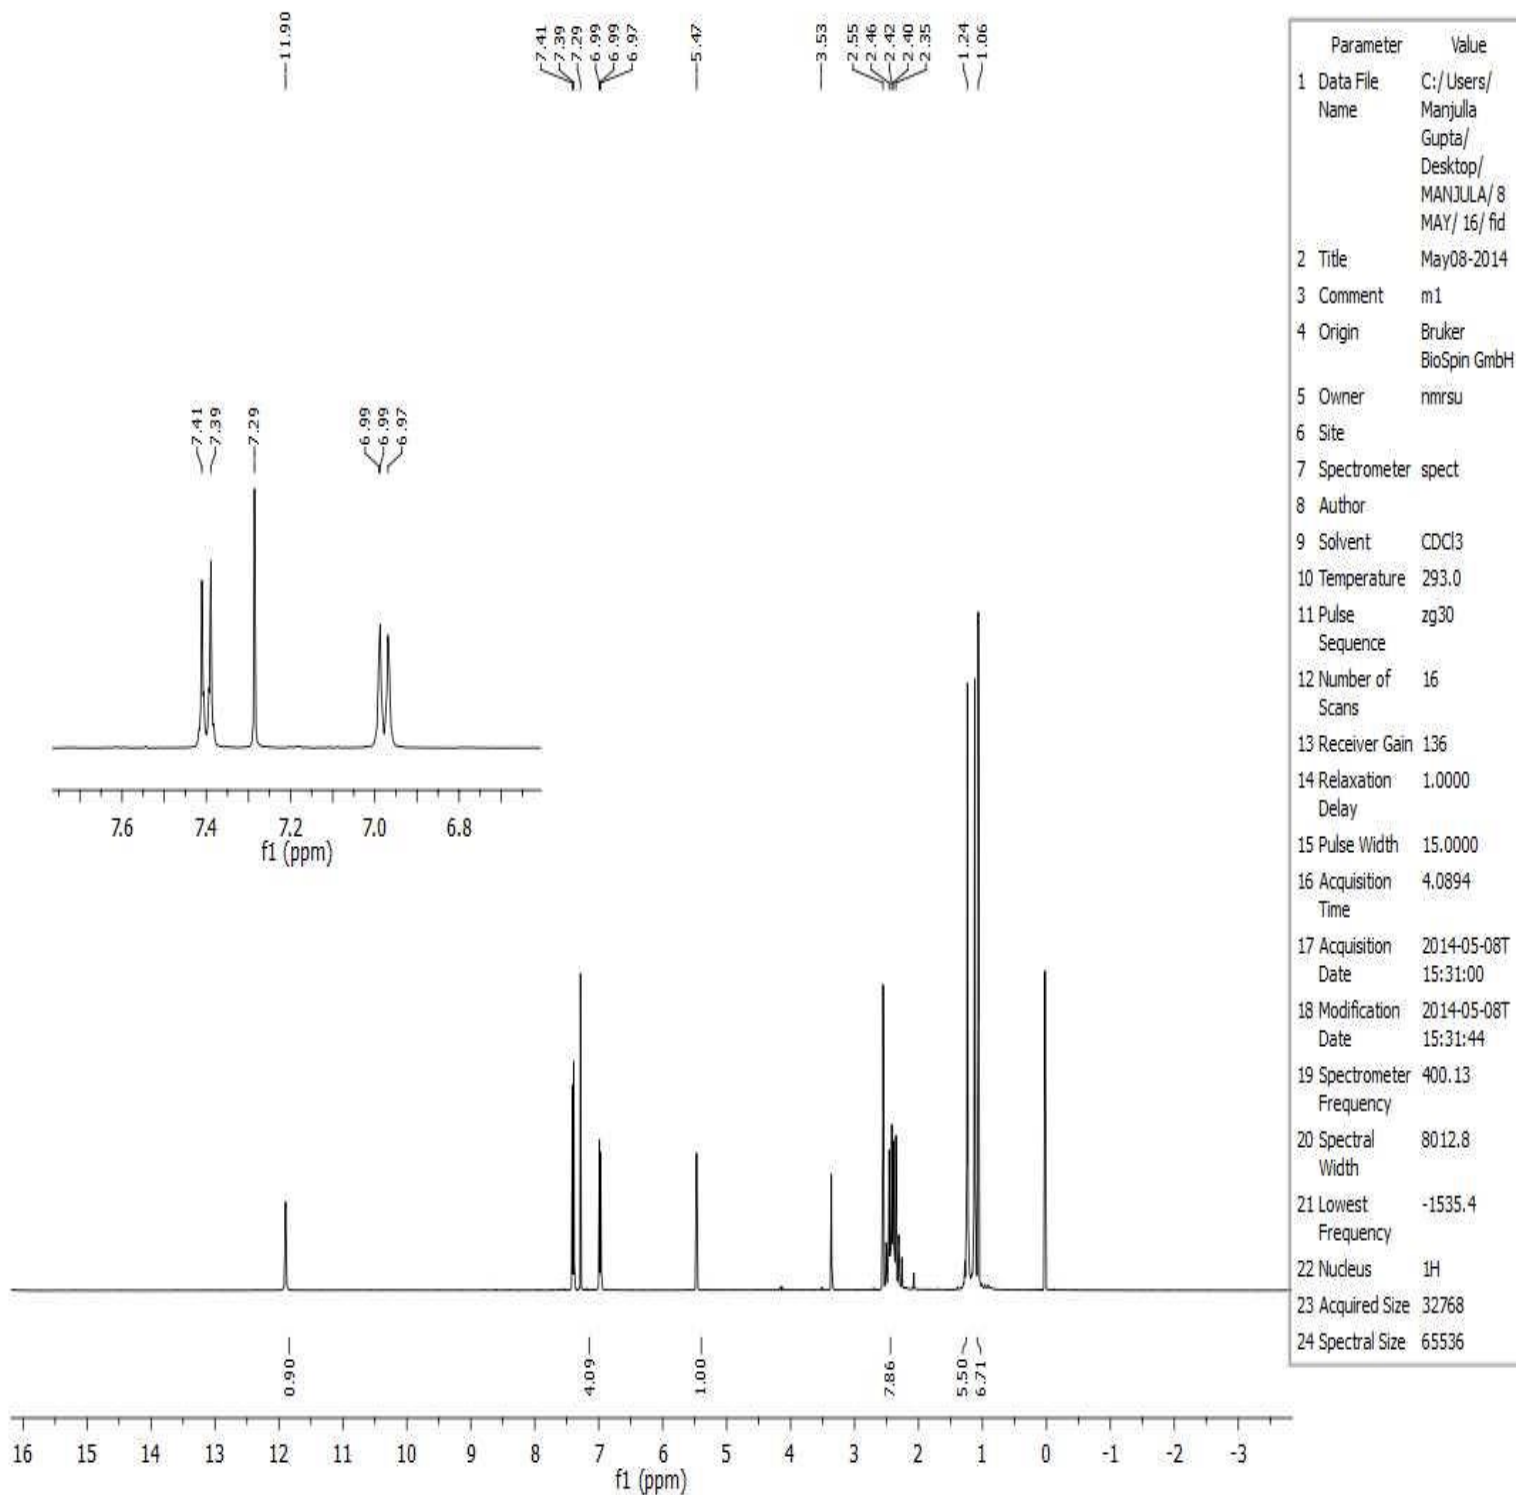

**Fig. 28**  $^1\text{H}$  NMR spectra of 3,3,6,6-Tetramethyl-9-(4-methoxyphenyl)-1,8-dioxodecahydroacridine

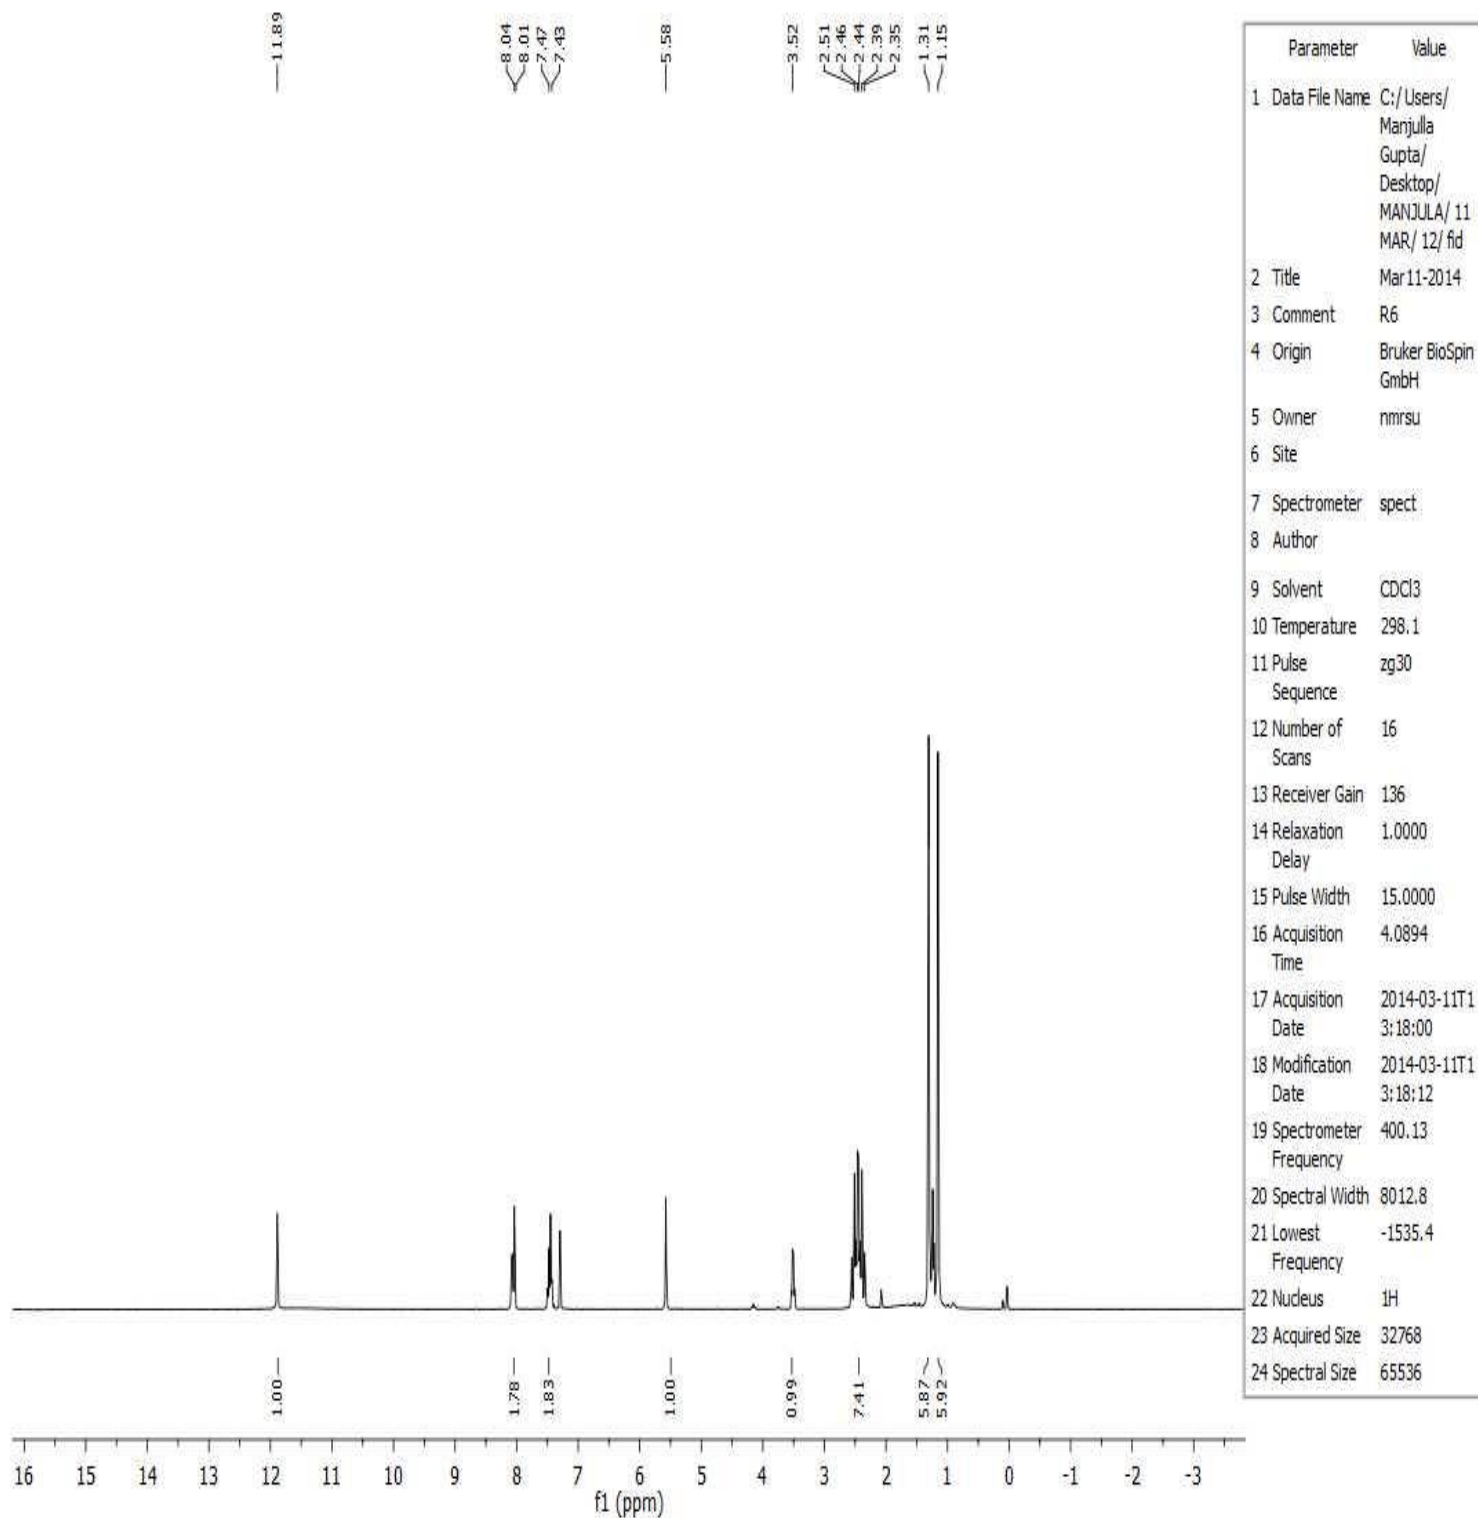

**Fig. 29** <sup>1</sup>H NMR spectra of 3,3,6,6-Tetramethyl-9-(4-hydroxyphenyl)-1,8-dioxodecahydroacridine

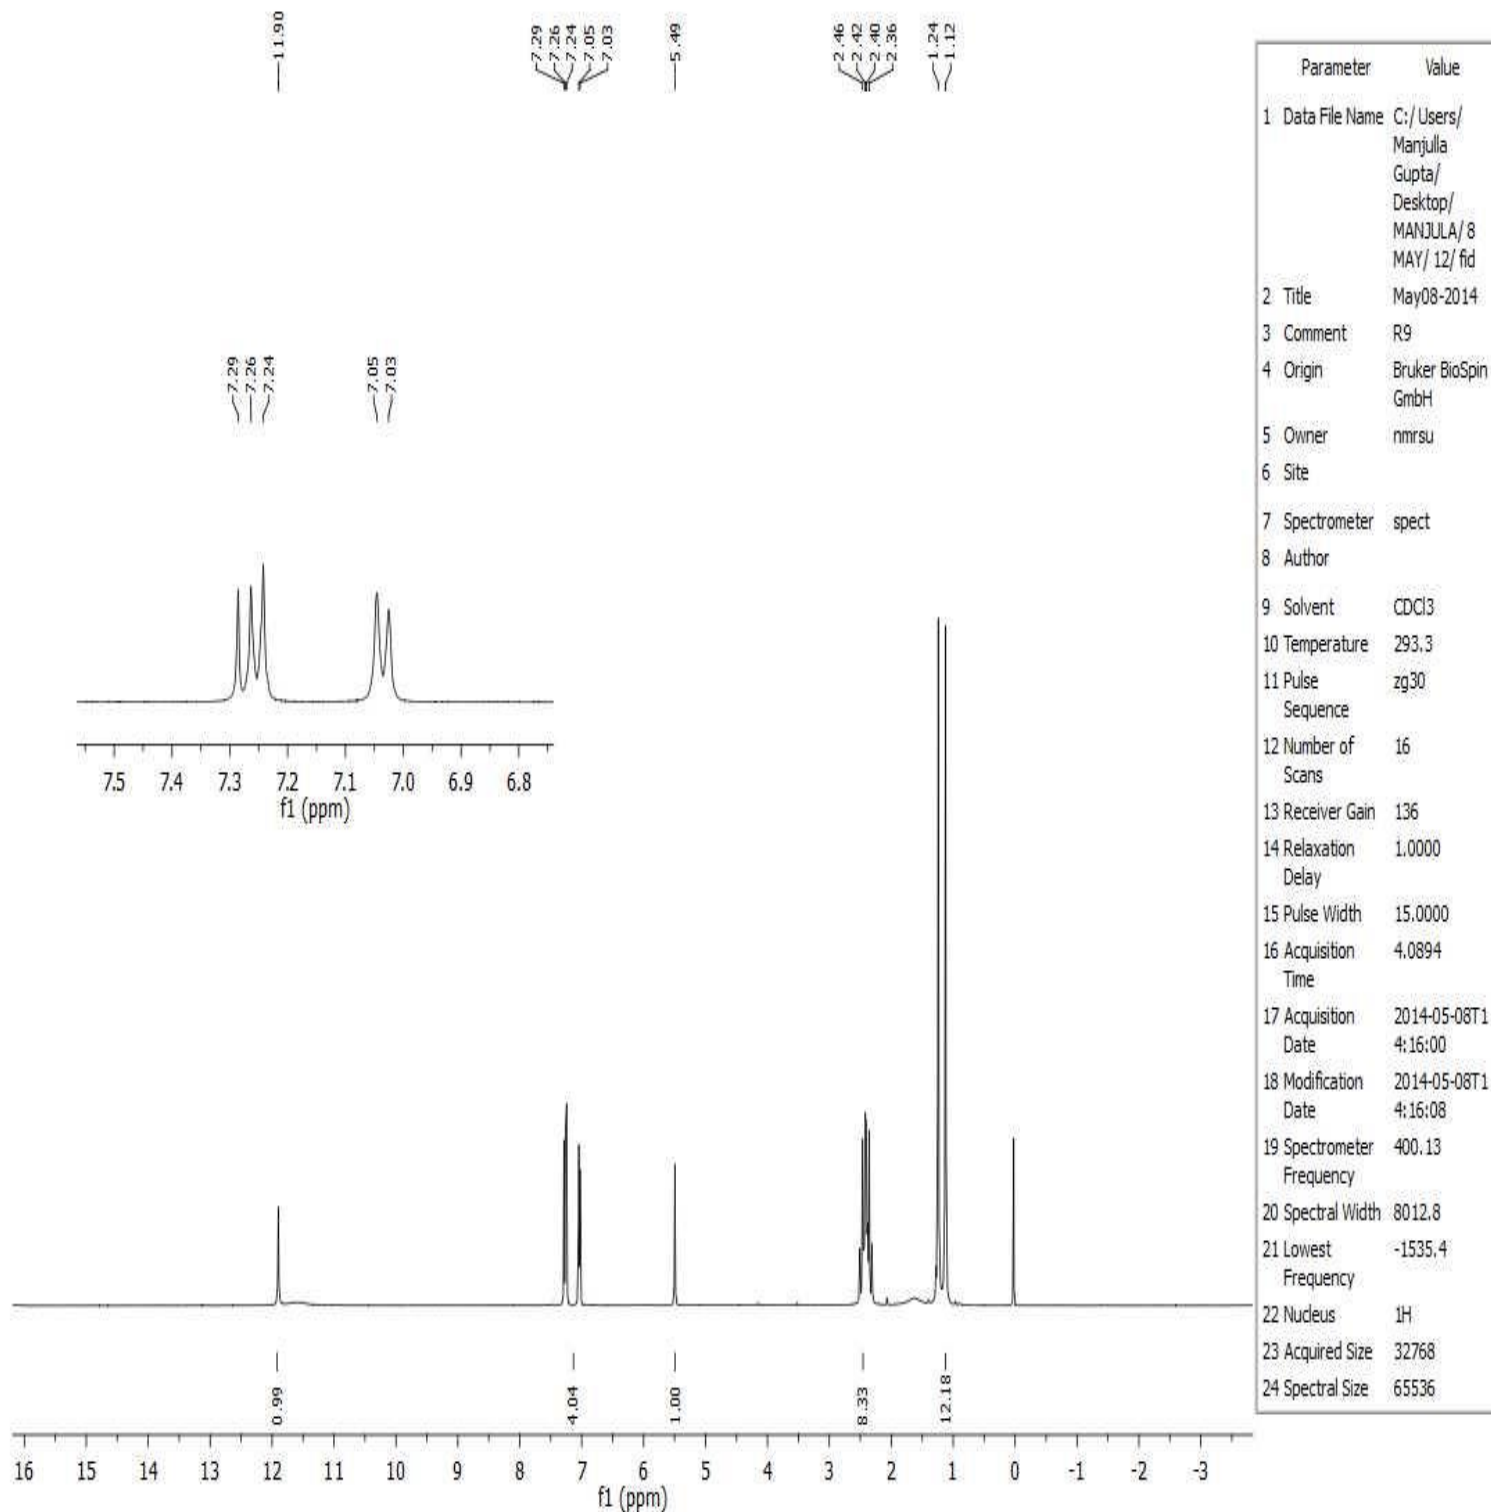

**Fig. 30**  $^1\text{H}$  NMR spectra of 3,3,6,6-Tetramethyl-9-(4-fluorophenyl)-1,8-dioxodecahydroacridine

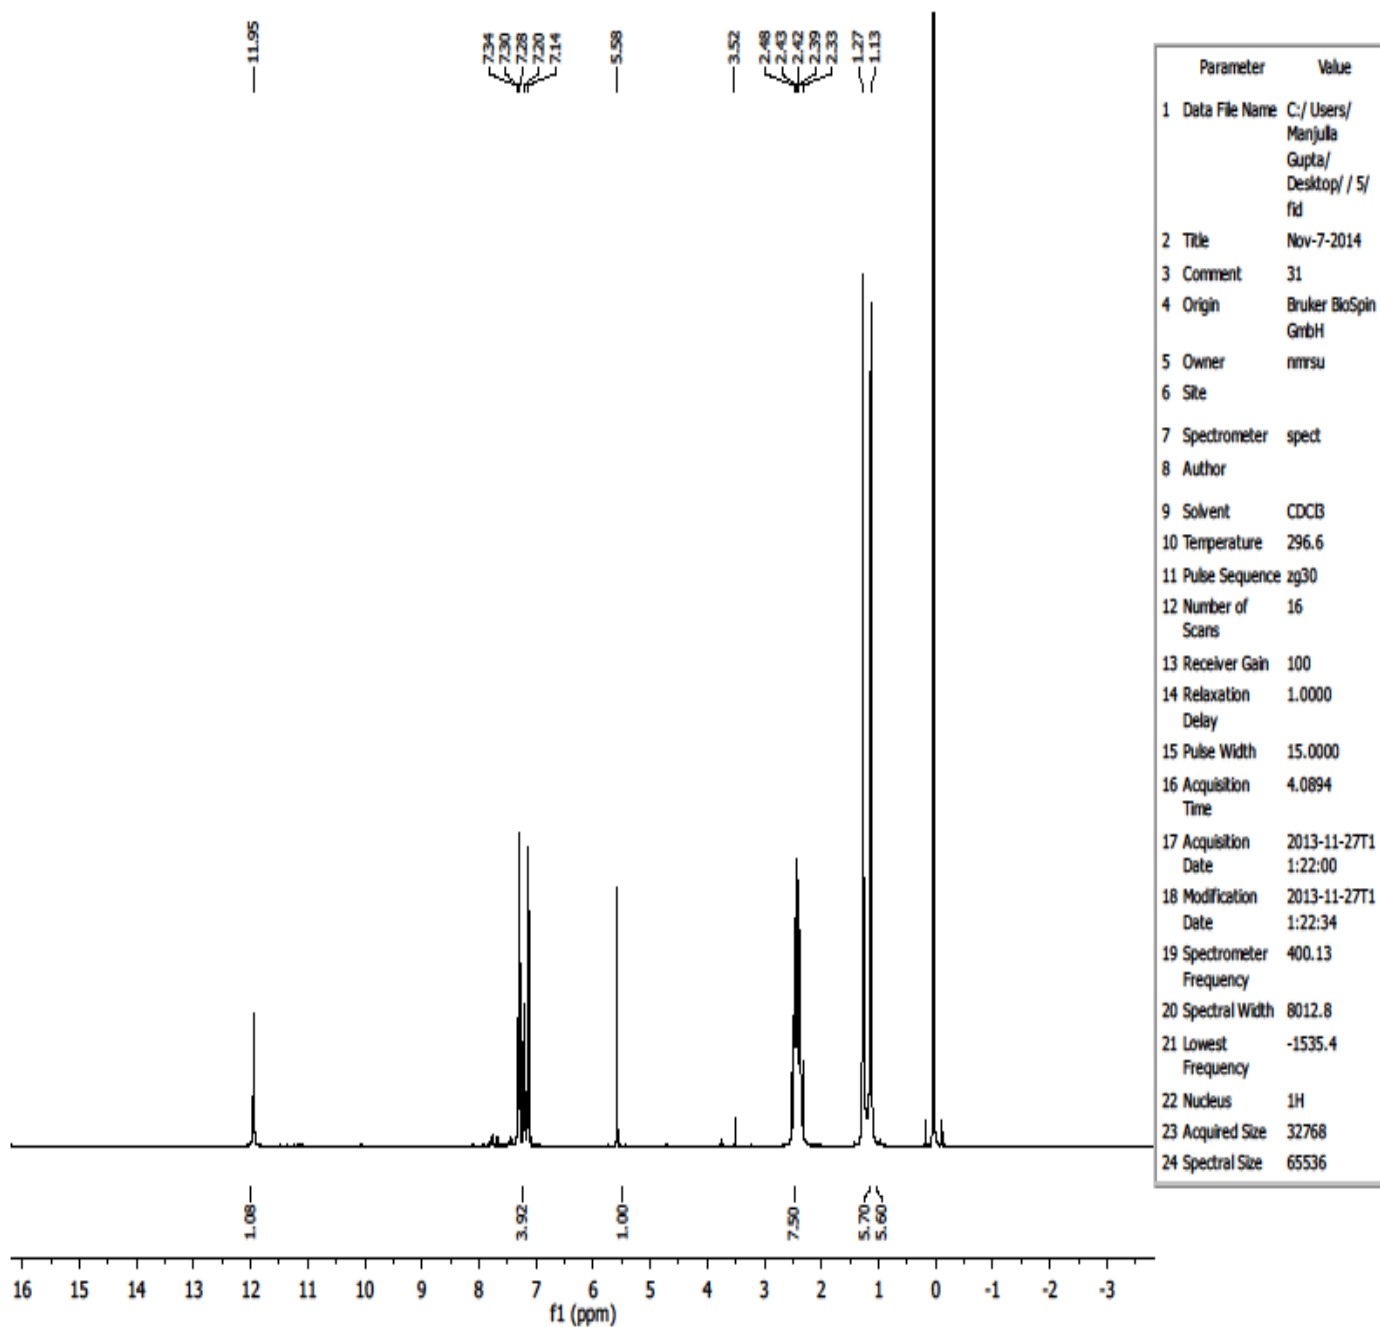

**Fig. 31**  $^1\text{H}$  NMR spectra of 3,3,6,6-Tetramethyl-9-(4-(dimethylamino)phenyl)-1,8-dioxodecahydroacridine

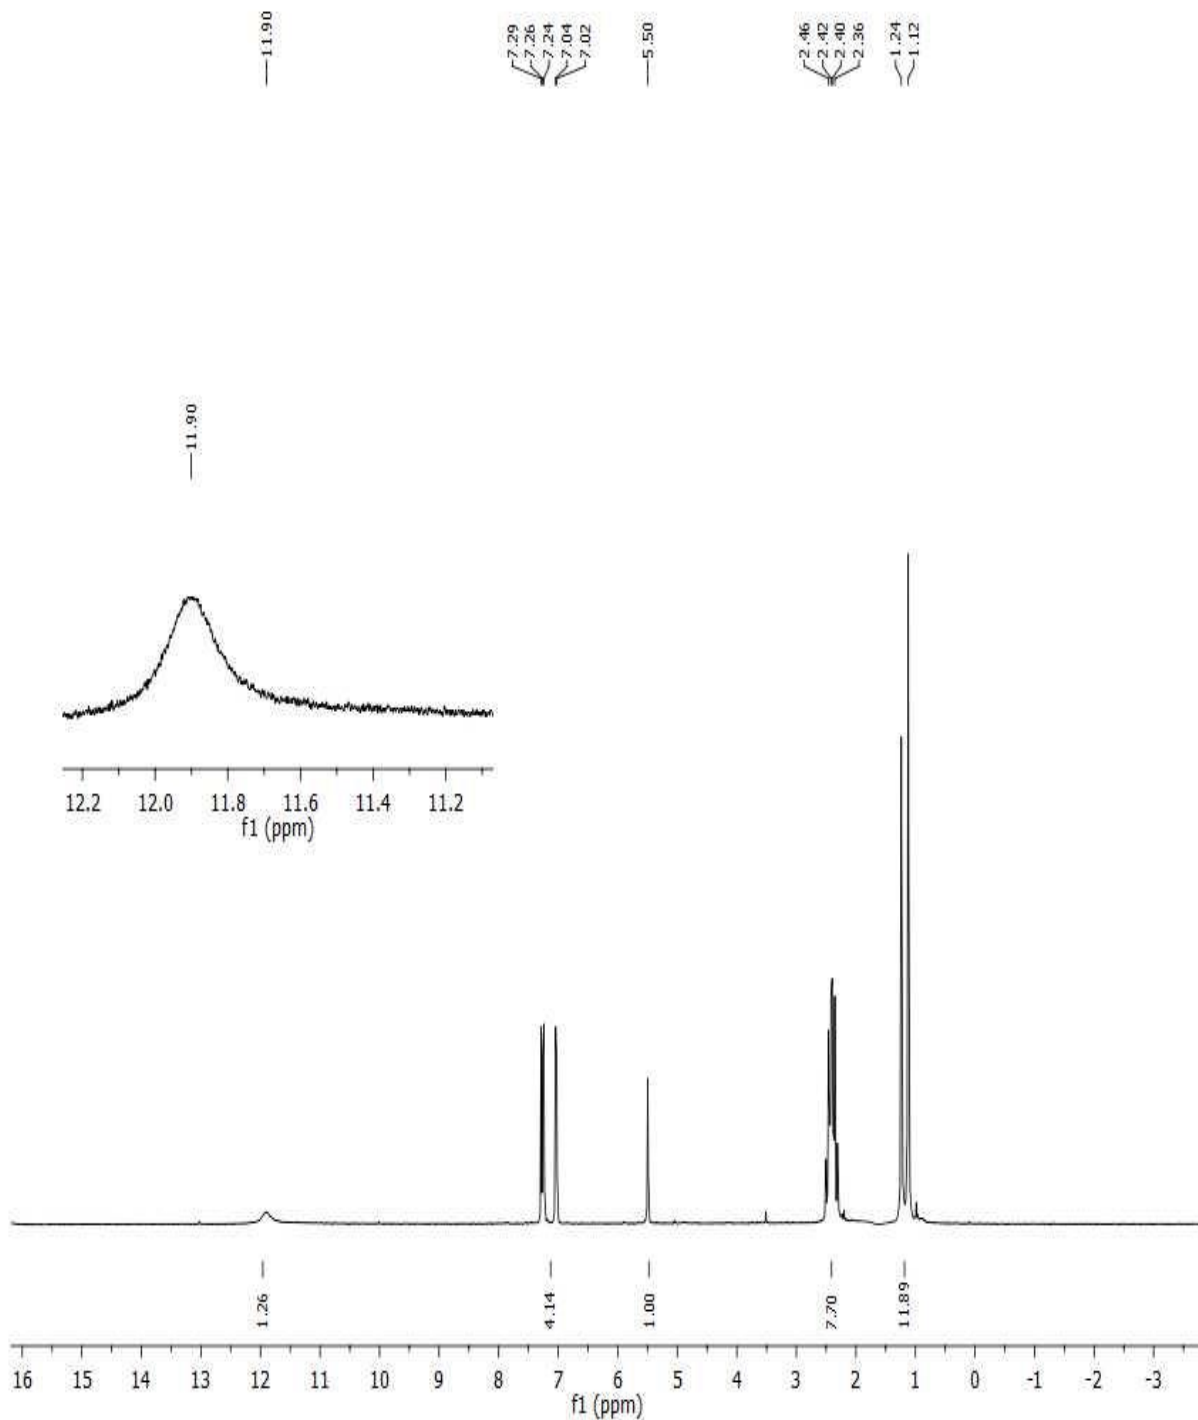

| Parameter                 | Value                                                    |
|---------------------------|----------------------------------------------------------|
| 1 Data File Name          | C:/Users/Manjulla Gupta/Desktop/New folder/MANJULA/3/fid |
| 2 Title                   | Sep16-2014                                               |
| 3 Comment                 | A1                                                       |
| 4 Origin                  | Bruker BioSpin GmbH                                      |
| 5 Owner                   | nmsu                                                     |
| 6 Site                    |                                                          |
| 7 Spectrometer            | spect                                                    |
| 8 Author                  |                                                          |
| 9 Solvent                 | CDCl <sub>3</sub>                                        |
| 10 Temperature            | 292.8                                                    |
| 11 Pulse Sequence         | zg30                                                     |
| 12 Number of Scans        | 16                                                       |
| 13 Receiver Gain          | 178                                                      |
| 14 Relaxation Delay       | 1.0000                                                   |
| 15 Pulse Width            | 15.0000                                                  |
| 16 Acquisition Time       | 4.0894                                                   |
| 17 Acquisition Date       | 2014-09-16T11:46:00                                      |
| 18 Modification Date      | 2014-09-16T11:46:09                                      |
| 19 Spectrometer Frequency | 400.13                                                   |
| 20 Spectral Width         | 8012.8                                                   |
| 21 Lowest Frequency       | -1535.4                                                  |
| 22 Nucleus                | <sup>1</sup> H                                           |
| 23 Acquired Size          | 32768                                                    |
| 24 Spectral Size          | 65536                                                    |

**Fig. 32** <sup>1</sup>H NMR spectra of 3,3,6,6-Tetramethyl-9-(4-chlorophenyl)-1,8-dioxodecahydroacridine



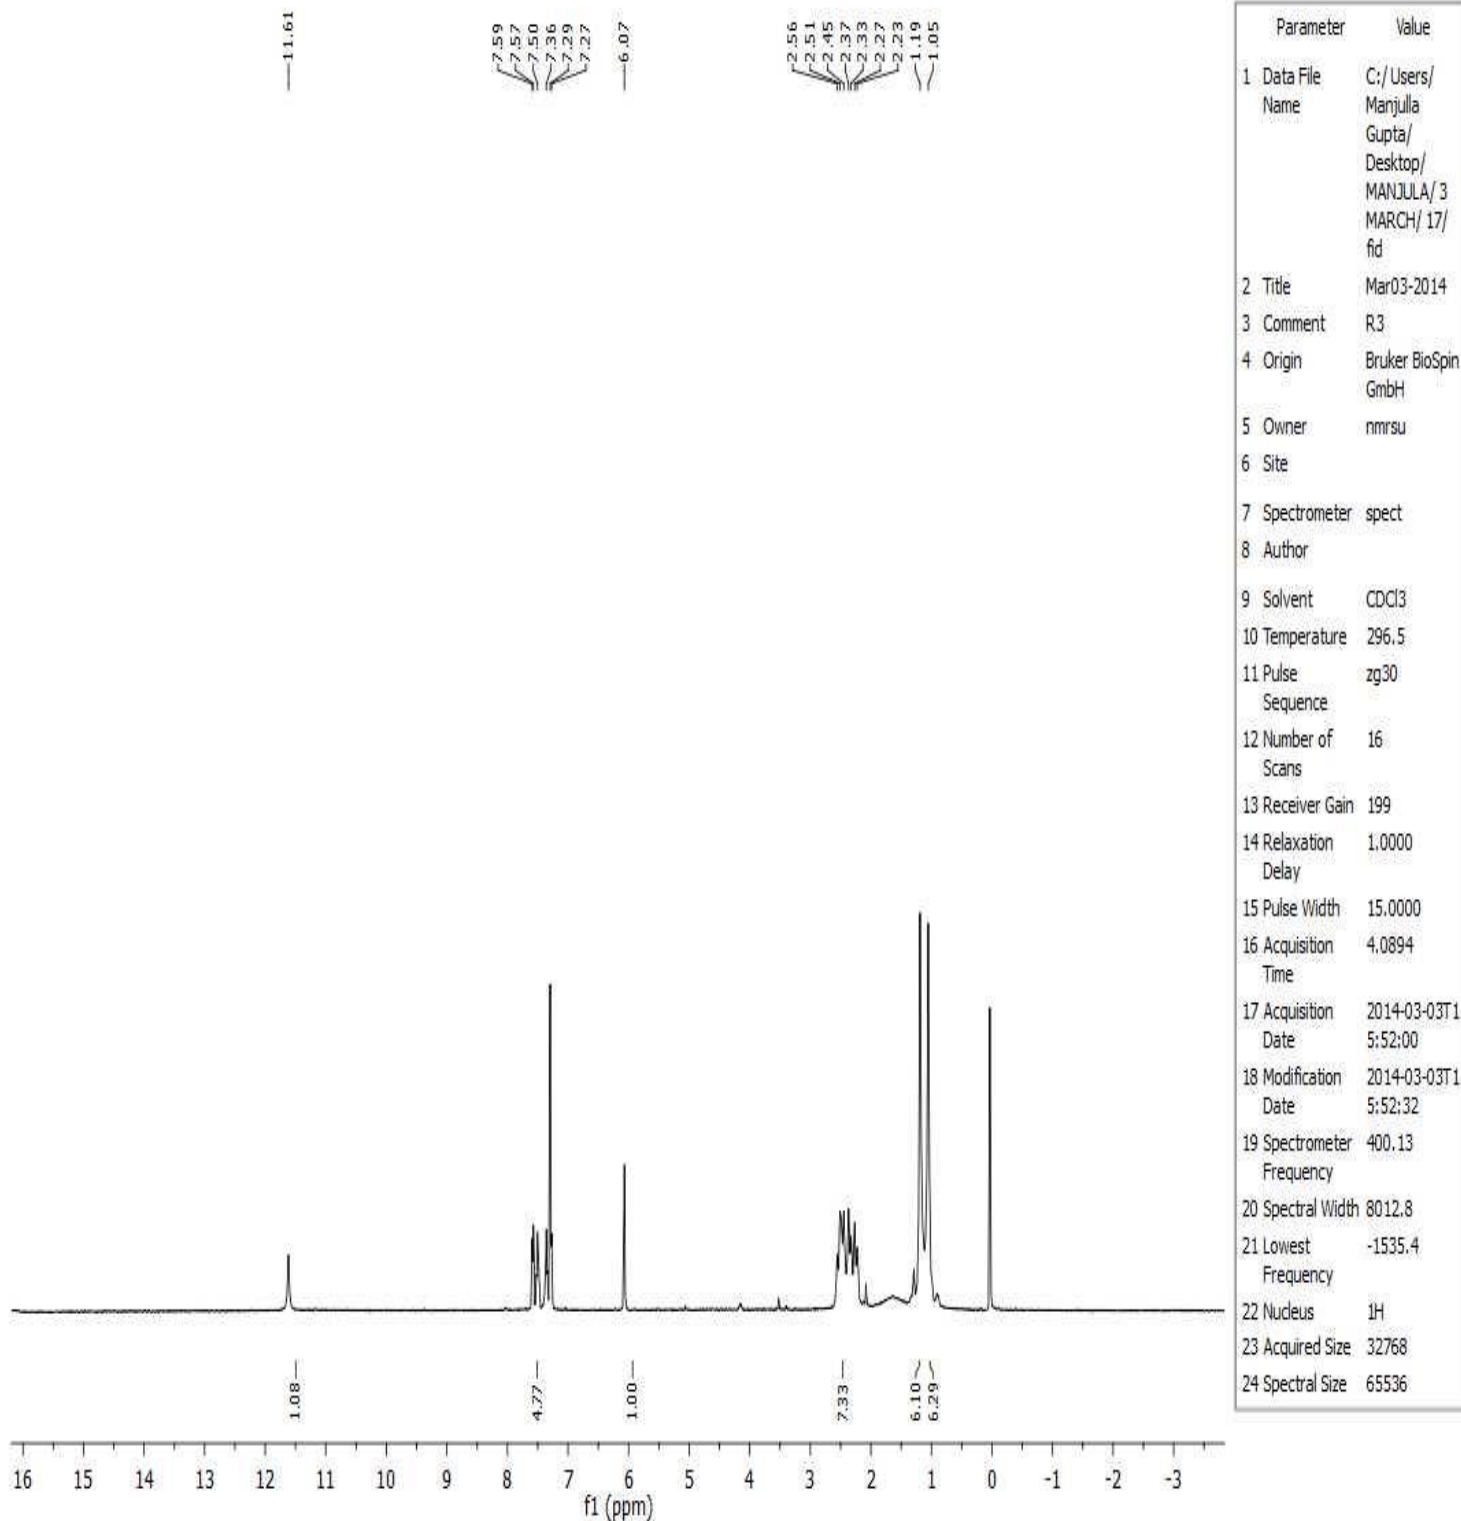

**Fig. 33**  $^1\text{H}$  NMR spectra of 3,3,6,6-Tetramethyl -9-(2-chlorophenyl)-1,8-dioxodecahydroacridine

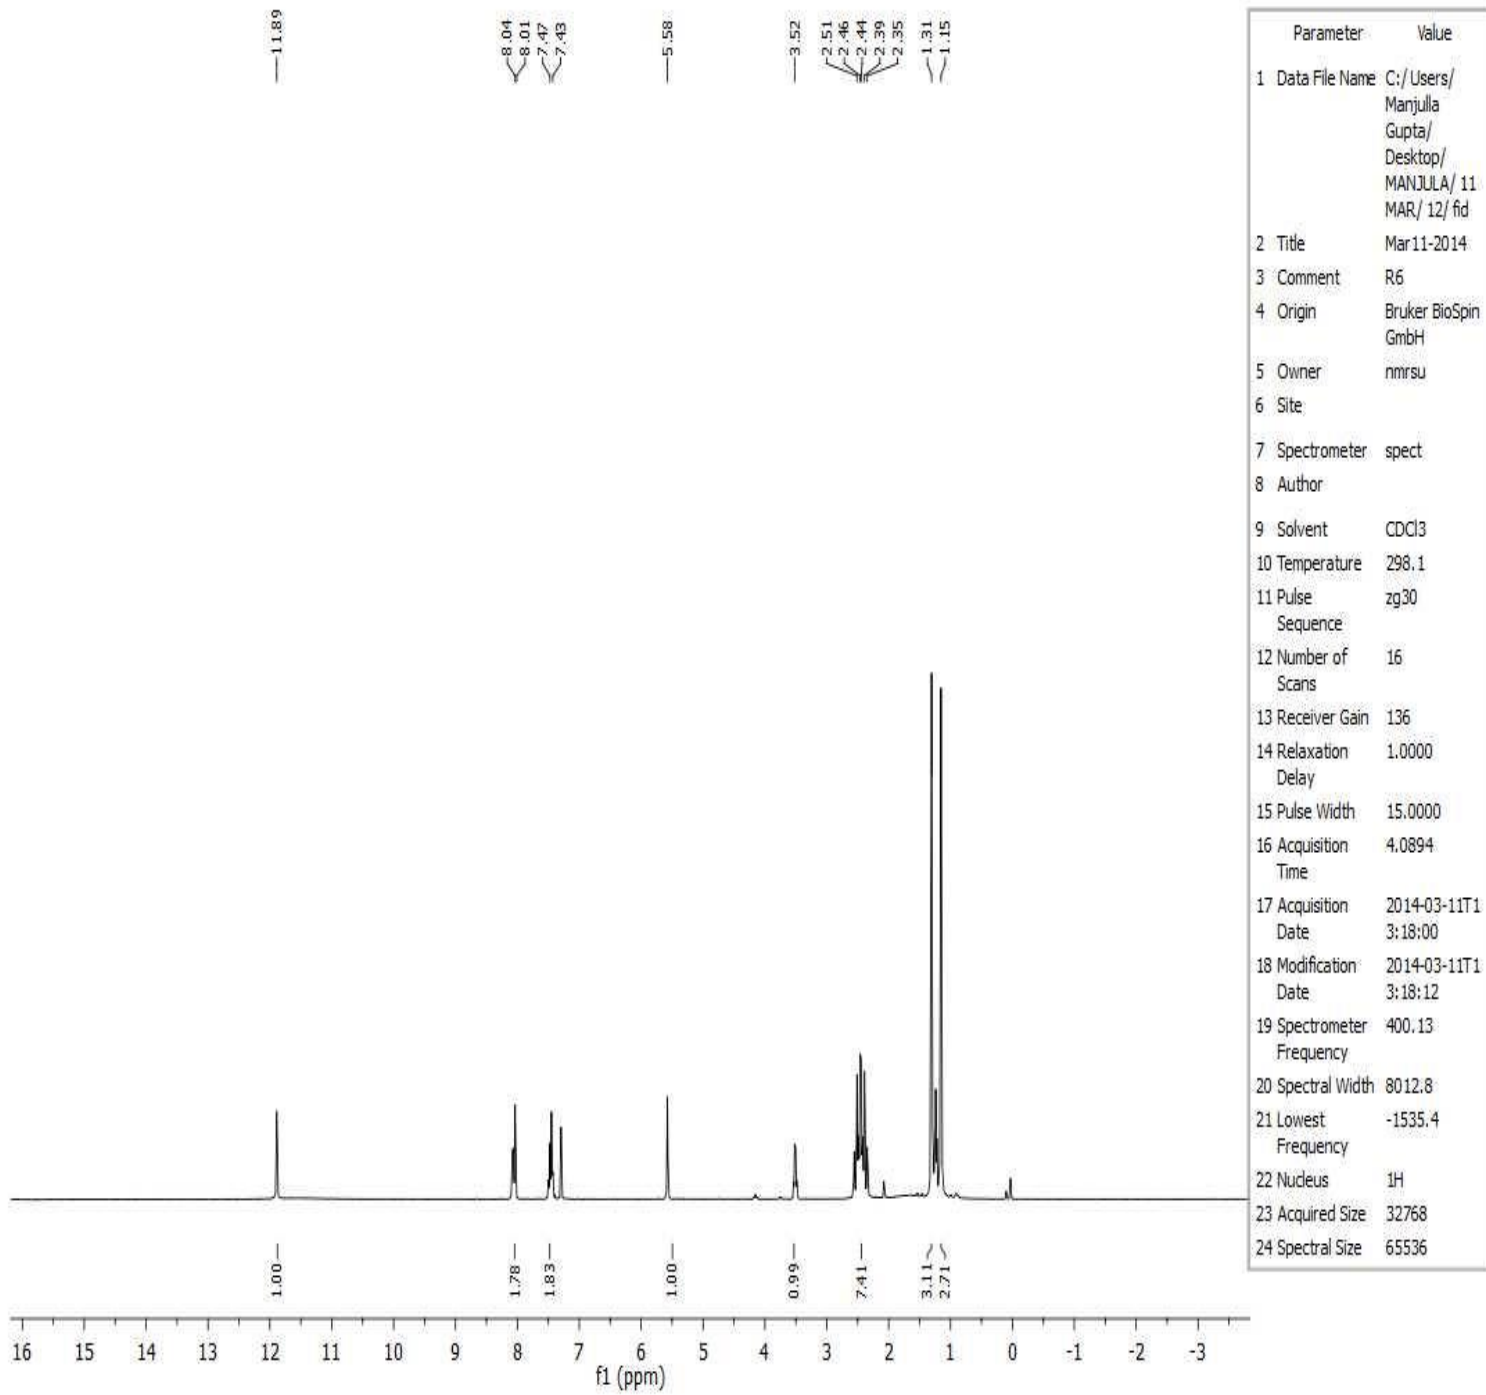

**Fig. 34**  $^1\text{H}$  NMR spectra of 3,3,6,6-Tetramethyl -9-(3-chlorophenyl)-1,8-dioxodecahydroacridine

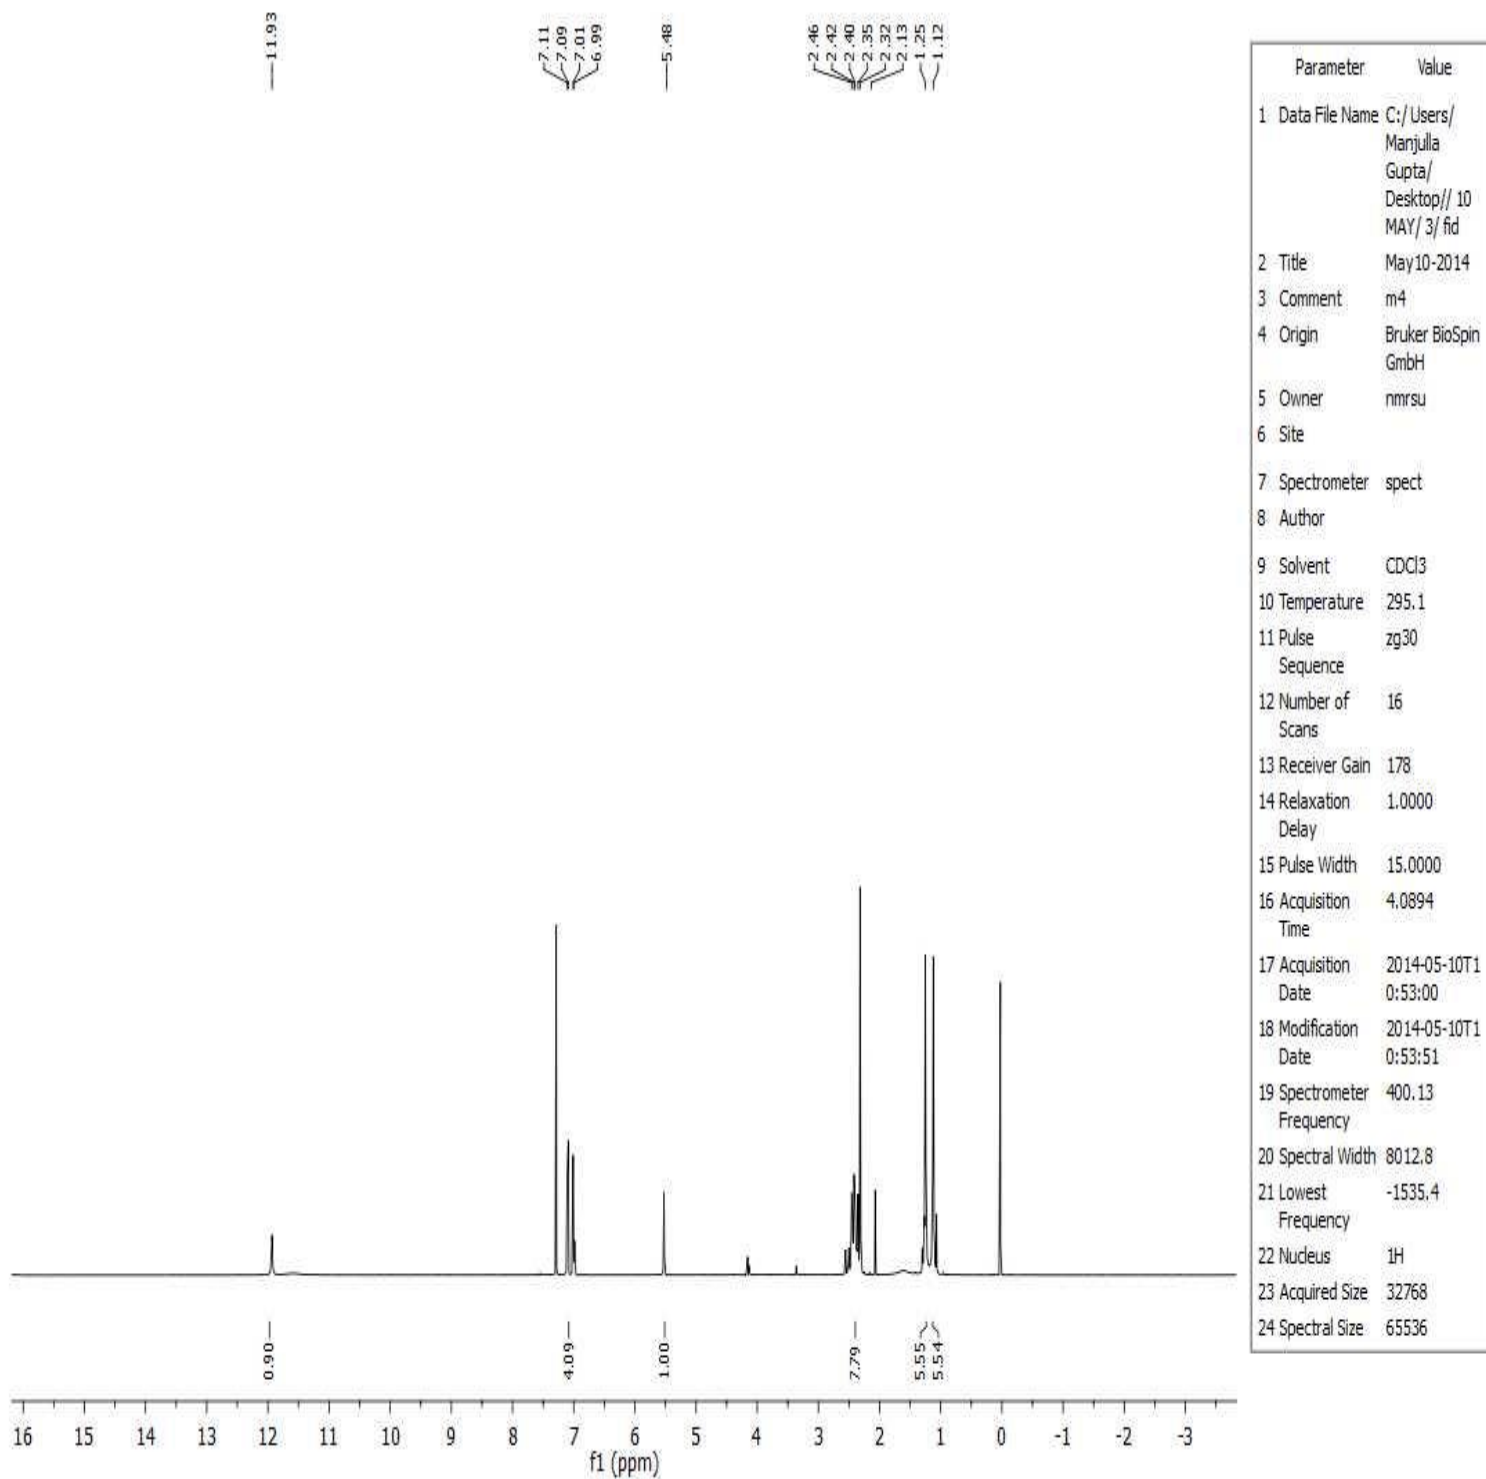

**Fig. 35** <sup>1</sup>H NMR spectra of 3,3,6,6-Tetramethyl-9-(4-bromophenyl)-1,8-dioxodecahydroacridine

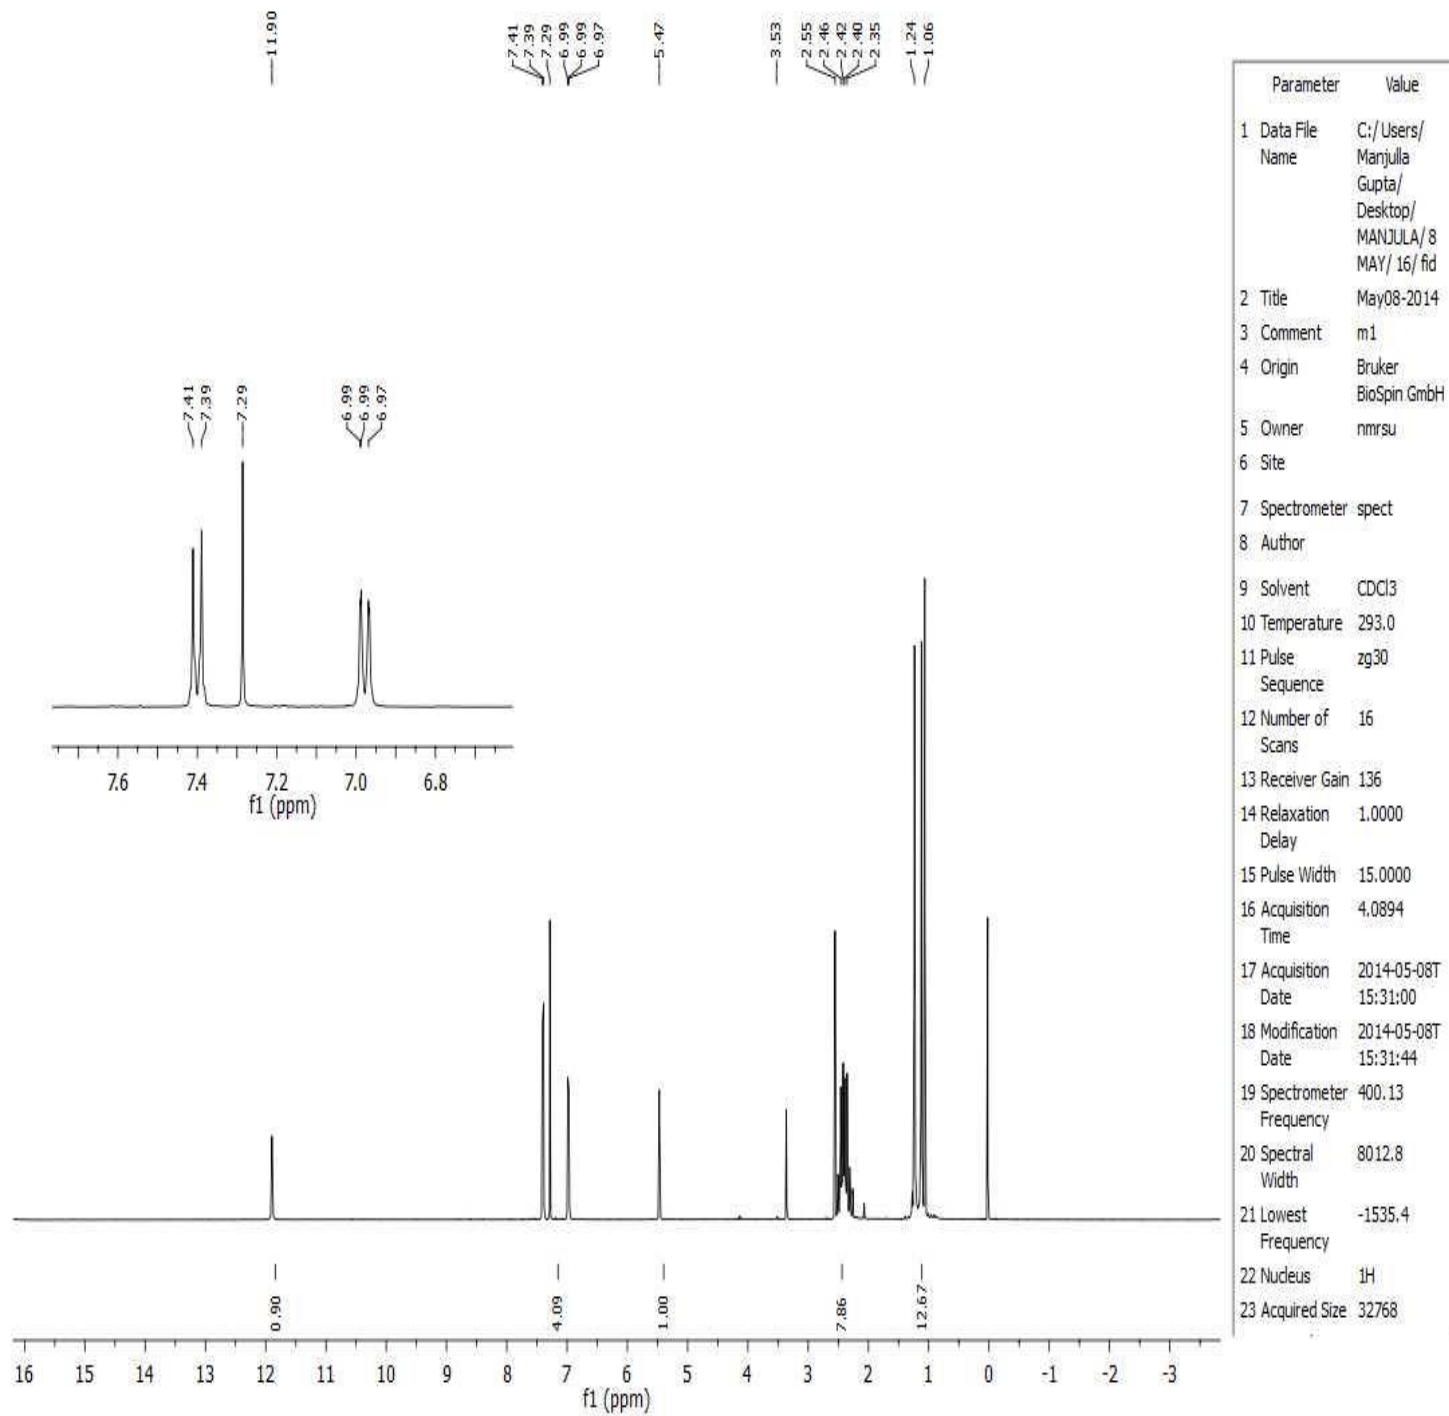

**Fig. 36**  $^1\text{H}$  NMR spectra of 3,3,6,6-Tetramethyl-9-(4-nitrophenyl)-1,8-dioxodecahydroacridine

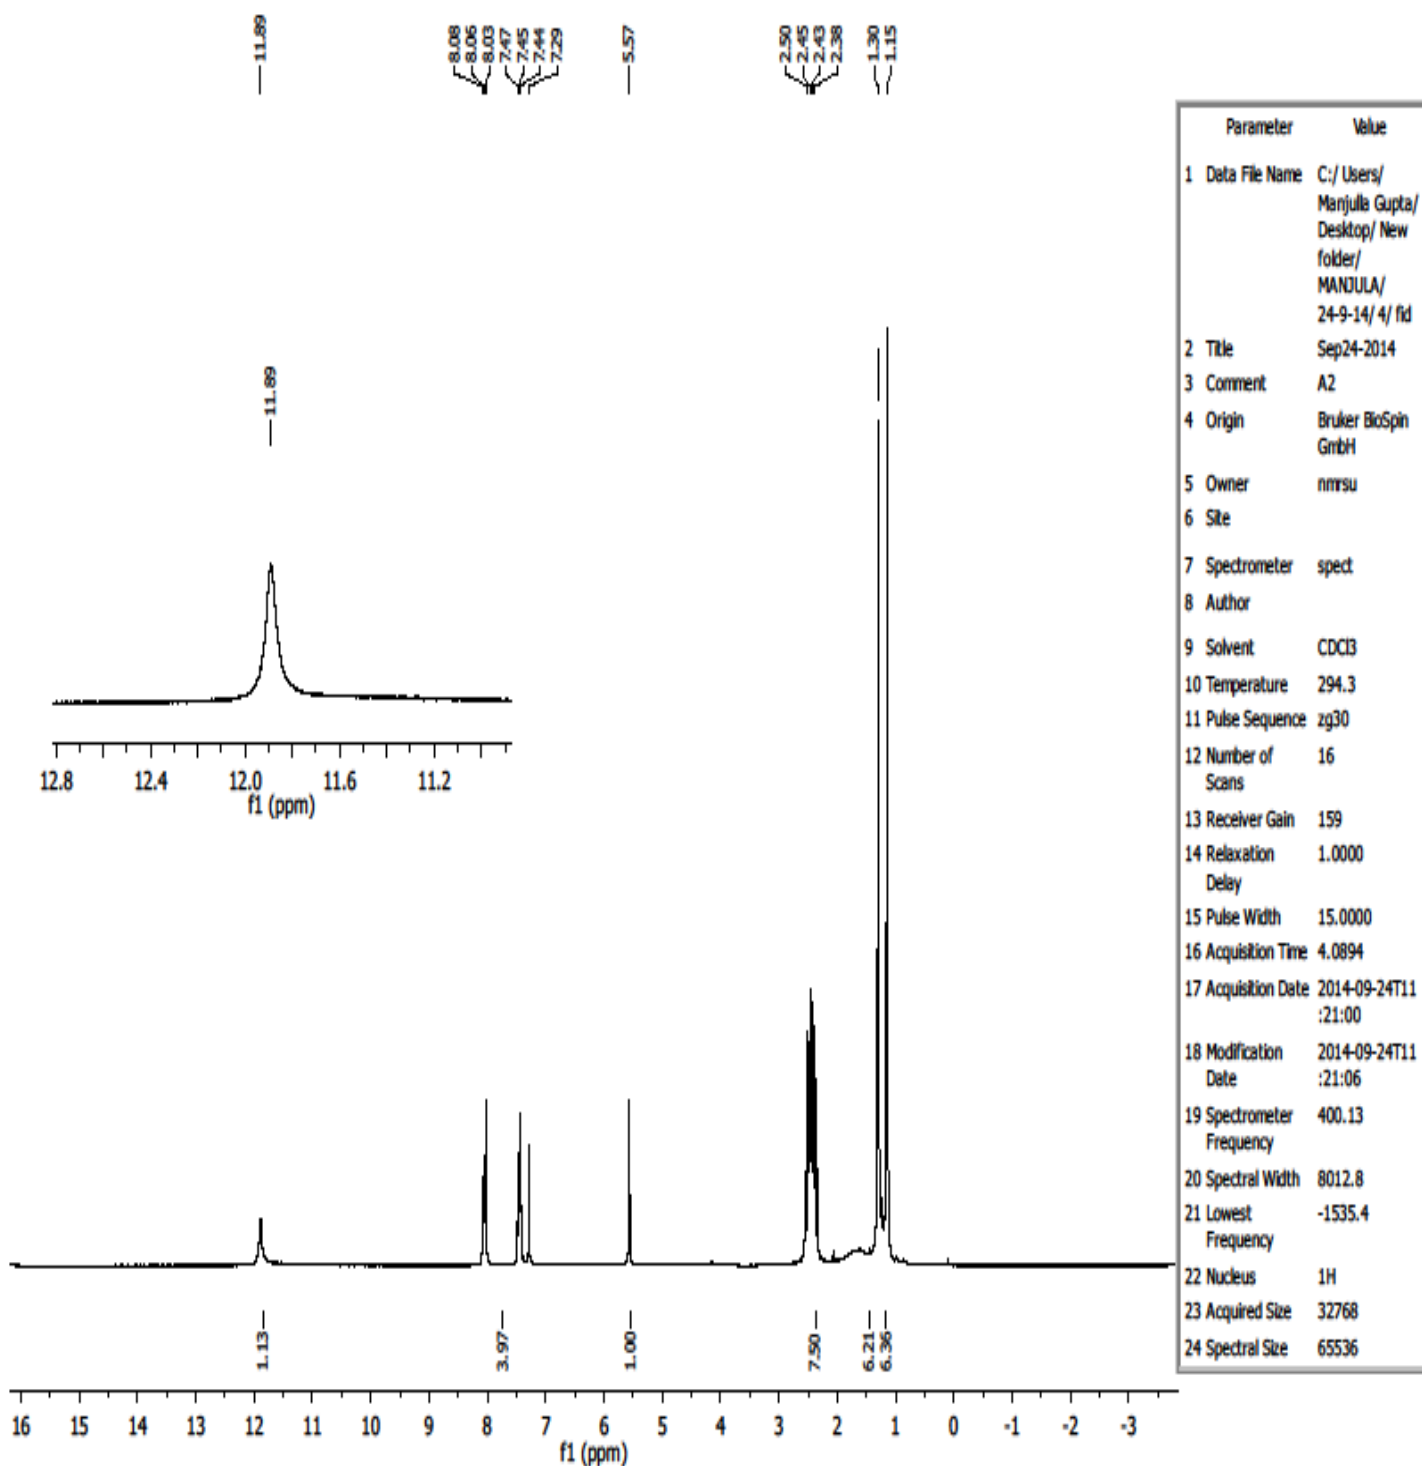

**Fig. 37**  $^1\text{H}$  NMR spectra of 3,3,6,6-Tetramethyl -9-(3-nitrophenyl)-1,8-dioxodecahydroacridine
